# Supplementary material
Source: publisher figshare collection journal article supplement (https://acs.figshare.com/ndownloader/files/7269419)
Supplement: Supplementary file 1 [file 7269419]

## **Polycyclic Ring Formation Using Bis-Diazolactams for Cascade Stitching**

Sara A. Bonderoff and Albert Padwa\*

*Department of Chemistry, Emory University, Atlanta Georgia 30322 USA*

[chemap@emory.edu](mailto:chemap@emory.edu)

### ***Table of Contents for Spectra***

|         |                                                                         |
|---------|-------------------------------------------------------------------------|
| Page 3  | <sup>1</sup> H-NMR (400 MHz, CDCl <sub>3</sub> ) of compound <b>14</b>  |
| Page 4  | <sup>13</sup> C-NMR (100 MHz, CDCl <sub>3</sub> ) of compound <b>14</b> |
| Page 5  | <sup>1</sup> H-NMR (400 MHz, CDCl <sub>3</sub> ) of compound <b>15</b>  |
| Page 6  | <sup>13</sup> C-NMR (100 MHz, CDCl <sub>3</sub> ) of compound <b>15</b> |
| Page 7  | <sup>1</sup> H-NMR (400 MHz, CDCl <sub>3</sub> ) of compound <b>16</b>  |
| Page 8  | <sup>13</sup> C-NMR (100 MHz, CDCl <sub>3</sub> ) of compound <b>16</b> |
| Page 9  | <sup>1</sup> H-NMR (400 MHz, CDCl <sub>3</sub> ) of compound <b>17</b>  |
| Page 10 | <sup>13</sup> C-NMR (100 MHz, CDCl <sub>3</sub> ) of compound <b>17</b> |
| Page 11 | <sup>1</sup> H-NMR (400 MHz, CDCl <sub>3</sub> ) of compound <b>18</b>  |
| Page 12 | <sup>13</sup> C-NMR (100 MHz, CDCl <sub>3</sub> ) of compound <b>18</b> |
| Page 13 | <sup>1</sup> H-NMR (400 MHz, CDCl <sub>3</sub> ) of compound <b>20</b>  |
| Page 14 | <sup>13</sup> C-NMR (100 MHz, CDCl <sub>3</sub> ) of compound <b>20</b> |
| Page 15 | <sup>1</sup> H-NMR (400 MHz, CDCl <sub>3</sub> ) of compound <b>21</b>  |
| Page 16 | <sup>13</sup> C-NMR (100 MHz, CDCl <sub>3</sub> ) of compound <b>21</b> |
| Page 17 | <sup>1</sup> H-NMR (600 MHz, CDCl <sub>3</sub> ) of compound <b>22</b>  |
| Page 18 | <sup>13</sup> C-NMR (150 MHz, CDCl <sub>3</sub> ) of compound <b>22</b> |
| Page 19 | <sup>1</sup> H-NMR (400 MHz, CDCl <sub>3</sub> ) of compound <b>23</b>  |
| Page 20 | <sup>13</sup> C-NMR (100 MHz, CDCl <sub>3</sub> ) of compound <b>23</b> |
| Page 21 | <sup>1</sup> H-NMR (400 MHz, CDCl <sub>3</sub> ) of compound <b>24</b>  |
| Page 22 | <sup>13</sup> C-NMR (100 MHz, CDCl <sub>3</sub> ) of compound <b>24</b> |
| Page 23 | <sup>1</sup> H-NMR (600 MHz, CDCl <sub>3</sub> ) of compound <b>25</b>  |
| Page 24 | <sup>13</sup> C-NMR (150 MHz, CDCl <sub>3</sub> ) of compound <b>25</b> |
| Page 25 | <sup>1</sup> H-NMR (600 MHz, CDCl <sub>3</sub> ) of compound <b>28</b>  |
| Page 26 | <sup>13</sup> C-NMR (100 MHz, CDCl <sub>3</sub> ) of compound <b>28</b> |
| Page 27 | <sup>1</sup> H-NMR (400 MHz, CDCl <sub>3</sub> ) of compound <b>29</b>  |
| Page 28 | <sup>13</sup> C-NMR (100 MHz, CDCl <sub>3</sub> ) of compound <b>29</b> |
| Page 29 | <sup>1</sup> H-NMR (400 MHz, CDCl <sub>3</sub> ) of compound <b>30</b>  |
| Page 30 | <sup>13</sup> C-NMR (100 MHz, CDCl <sub>3</sub> ) of compound <b>30</b> |
| Page 31 | <sup>1</sup> H-NMR (400 MHz, CDCl <sub>3</sub> ) of compound <b>31</b>  |
| Page 32 | <sup>13</sup> C-NMR (100 MHz, CDCl <sub>3</sub> ) of compound <b>31</b> |
| Page 33 | <sup>1</sup> H-NMR (400 MHz, CDCl <sub>3</sub> ) of compound <b>32</b>  |
| Page 34 | <sup>13</sup> C-NMR (100 MHz, CDCl <sub>3</sub> ) of compound <b>32</b> |
| Page 35 | <sup>1</sup> H-NMR (400 MHz, CDCl <sub>3</sub> ) of compound <b>33</b>  |

|         |                                                                        |
|---------|------------------------------------------------------------------------|
| Page 36 | $^{13}\text{C}$ -NMR (100 MHz, $\text{CDCl}_3$ ) of compound <b>33</b> |
| Page 37 | $^1\text{H}$ -NMR (400 MHz, $\text{CDCl}_3$ ) of compound <b>35</b>    |
| Page 38 | $^{13}\text{C}$ -NMR (100 MHz, $\text{CDCl}_3$ ) of compound <b>35</b> |
| Page 39 | $^1\text{H}$ -NMR (400 MHz, $\text{CDCl}_3$ ) of compound <b>36</b>    |
| Page 40 | $^{13}\text{C}$ -NMR (100 MHz, $\text{CDCl}_3$ ) of compound <b>36</b> |
| Page 41 | $^1\text{H}$ -NMR (400 MHz, $\text{CDCl}_3$ ) of compound <b>37</b>    |
| Page 42 | $^{13}\text{C}$ -NMR (100 MHz, $\text{CDCl}_3$ ) of compound <b>37</b> |
| Page 43 | $^1\text{H}$ -NMR (600 MHz, $\text{CDCl}_3$ ) of compound <b>38</b>    |
| Page 44 | $^{13}\text{C}$ -NMR (150 MHz, $\text{CDCl}_3$ ) of compound <b>38</b> |
| Page 45 | $^1\text{H}$ -NMR (400 MHz, $\text{CDCl}_3$ ) of compound <b>39</b>    |
| Page 46 | $^{13}\text{C}$ -NMR (100 MHz, $\text{CDCl}_3$ ) of compound <b>39</b> |
| Page 47 | $^1\text{H}$ -NMR (600 MHz, $\text{CDCl}_3$ ) of compound <b>40</b>    |
| Page 48 | $^{13}\text{C}$ -NMR (150 MHz, $\text{CDCl}_3$ ) of compound <b>40</b> |
| Page 49 | $^1\text{H}$ -NMR (400 MHz, $\text{CDCl}_3$ ) of compound <b>41</b>    |
| Page 50 | $^{13}\text{C}$ -NMR (100 MHz, $\text{CDCl}_3$ ) of compound <b>41</b> |
| Page 51 | $^1\text{H}$ -NMR (600 MHz, $\text{CDCl}_3$ ) of compound <b>42</b>    |
| Page 52 | $^{13}\text{C}$ -NMR (150 MHz, $\text{CDCl}_3$ ) of compound <b>42</b> |
| Page 53 | $^1\text{H}$ -NMR (600 MHz, $\text{CDCl}_3$ ) of compound <b>43</b>    |
| Page 54 | $^{13}\text{C}$ -NMR (100 MHz, $\text{CDCl}_3$ ) of compound <b>43</b> |
| Page 55 | $^1\text{H}$ -NMR (600 MHz, $\text{CDCl}_3$ ) of compound <b>44</b>    |
| Page 56 | $^{13}\text{C}$ -NMR (100 MHz, $\text{CDCl}_3$ ) of compound <b>44</b> |
| Page 57 | $^1\text{H}$ -NMR (400 MHz, $\text{CDCl}_3$ ) of compound <b>45</b>    |
| Page 58 | $^{13}\text{C}$ -NMR (100 MHz, $\text{CDCl}_3$ ) of compound <b>45</b> |
| Page 59 | $^1\text{H}$ -NMR (400 MHz, $\text{CDCl}_3$ ) of compound <b>46</b>    |
| Page 60 | $^{13}\text{C}$ -NMR (100 MHz, $\text{CDCl}_3$ ) of compound <b>46</b> |
| Page 61 | $^1\text{H}$ -NMR (400 MHz, $\text{CDCl}_3$ ) of compound <b>47</b>    |
| Page 62 | $^{13}\text{C}$ -NMR (100 MHz, $\text{CDCl}_3$ ) of compound <b>47</b> |
| Page 63 | Thermal ellipsoid plot of compound <b>37</b>                           |
| Page 64 | Thermal ellipsoid plot of compound <b>44</b>                           |
| Page 65 | General Experimental for Crystal Structure Determination               |
| Page 66 | Table 1. Crystal data and structure refinement for compound <b>37</b>  |
| Page 67 | Table 2. Crystal data and structure refinement for compound <b>44</b>  |

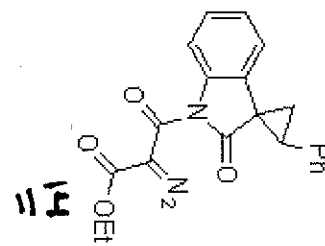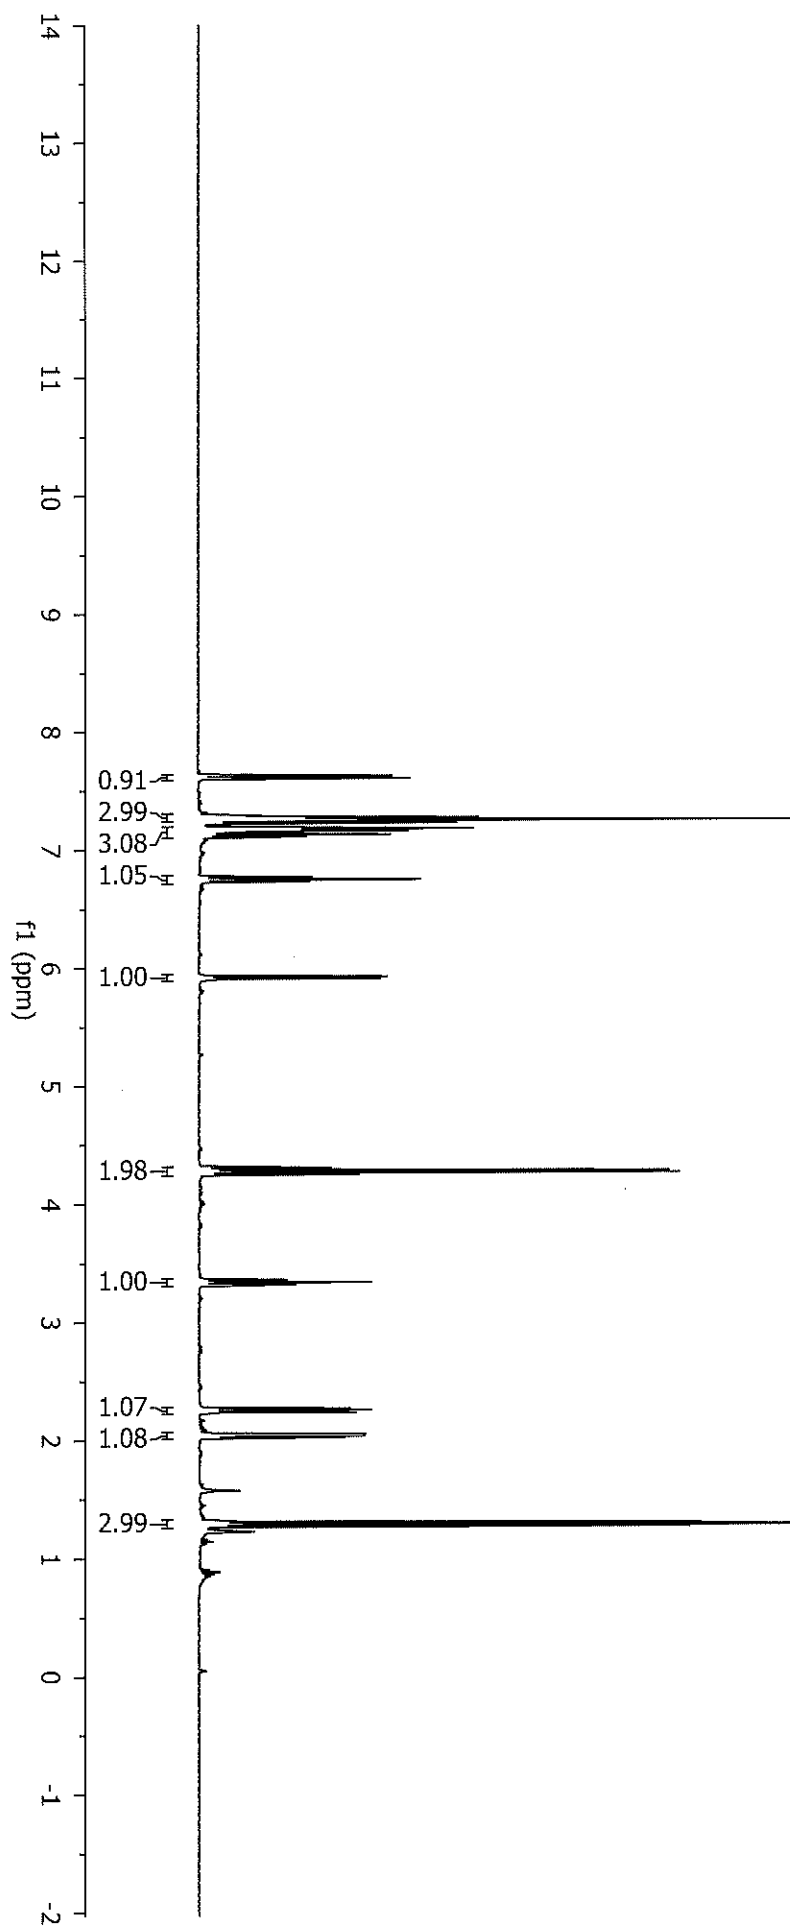

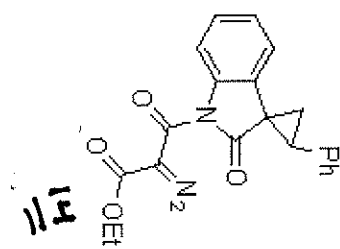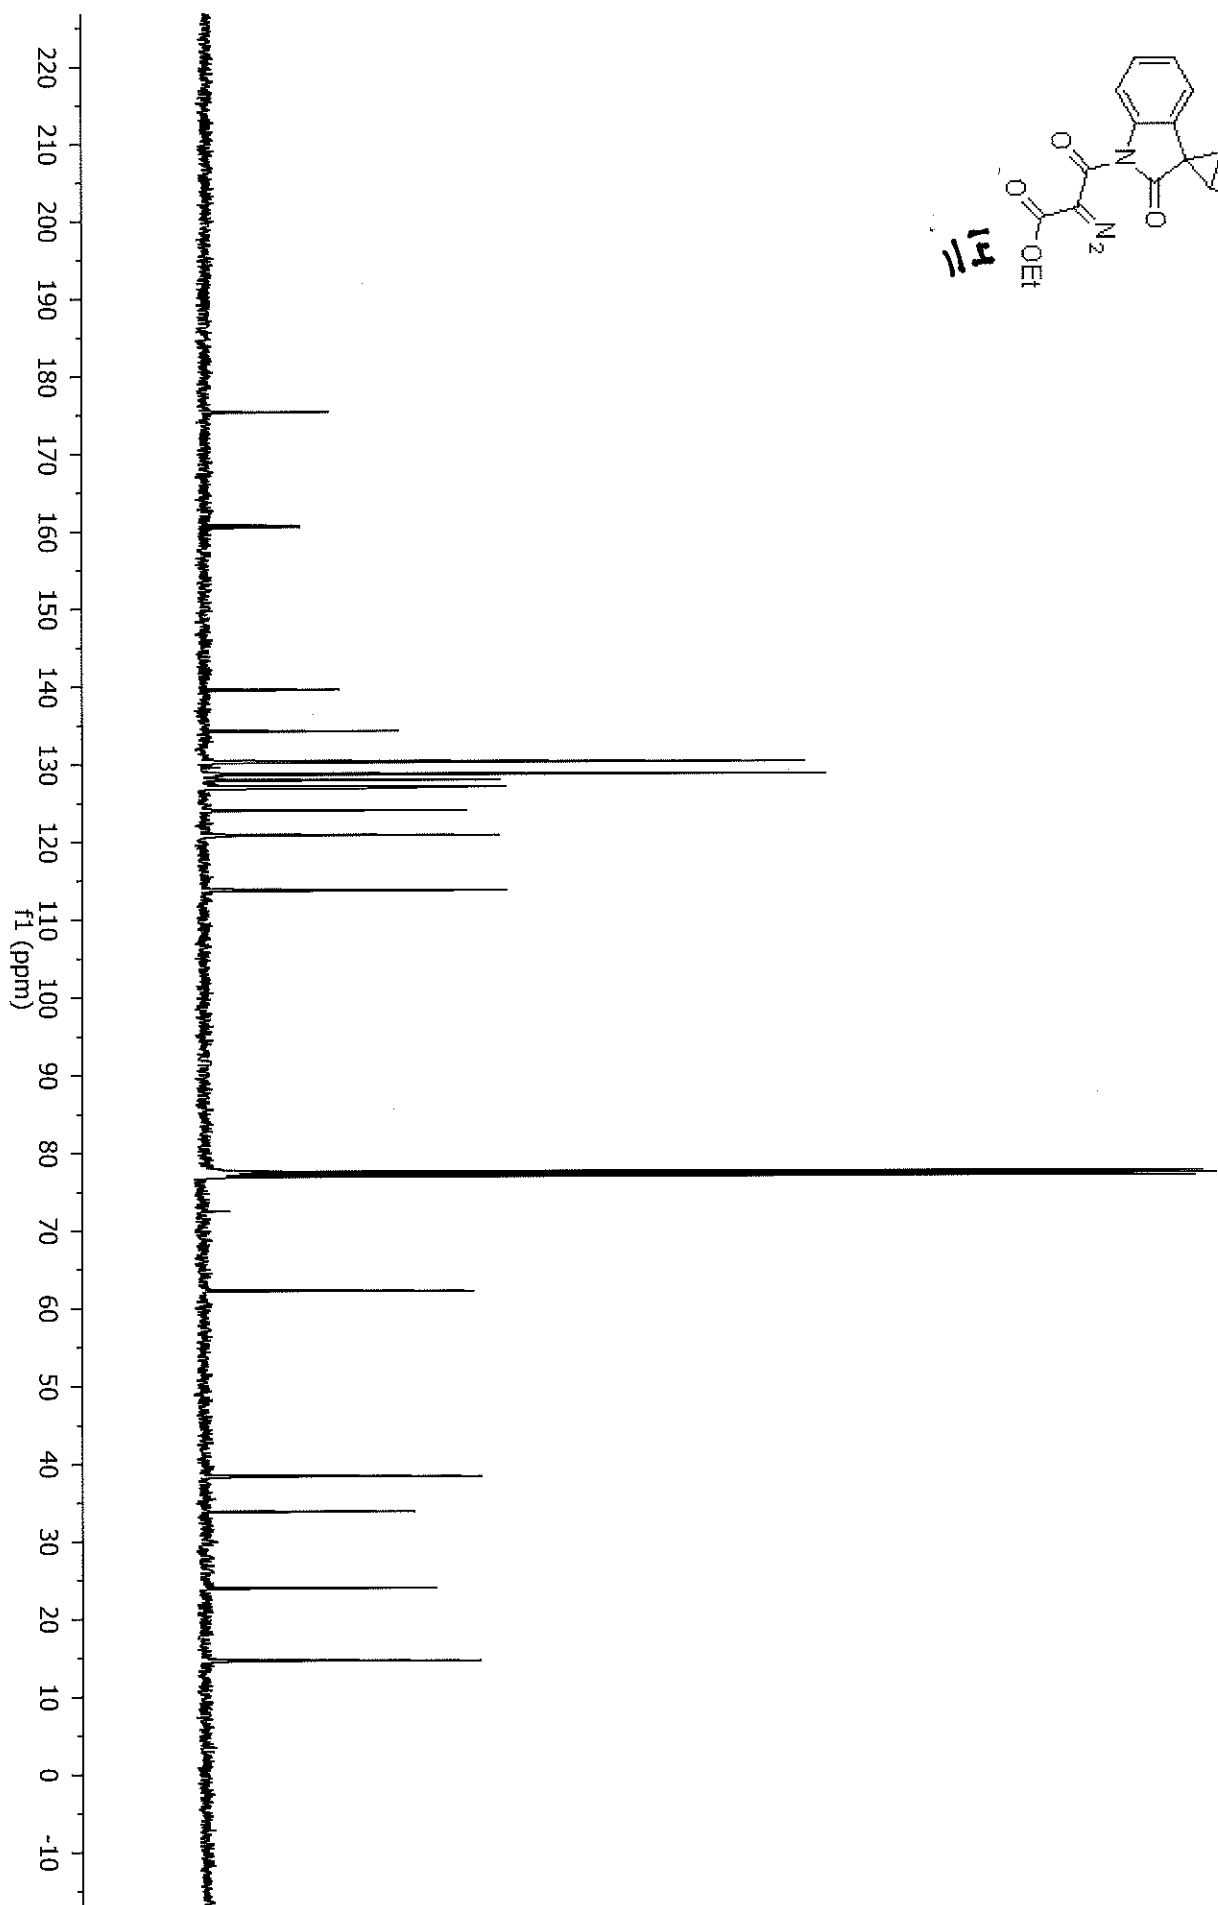

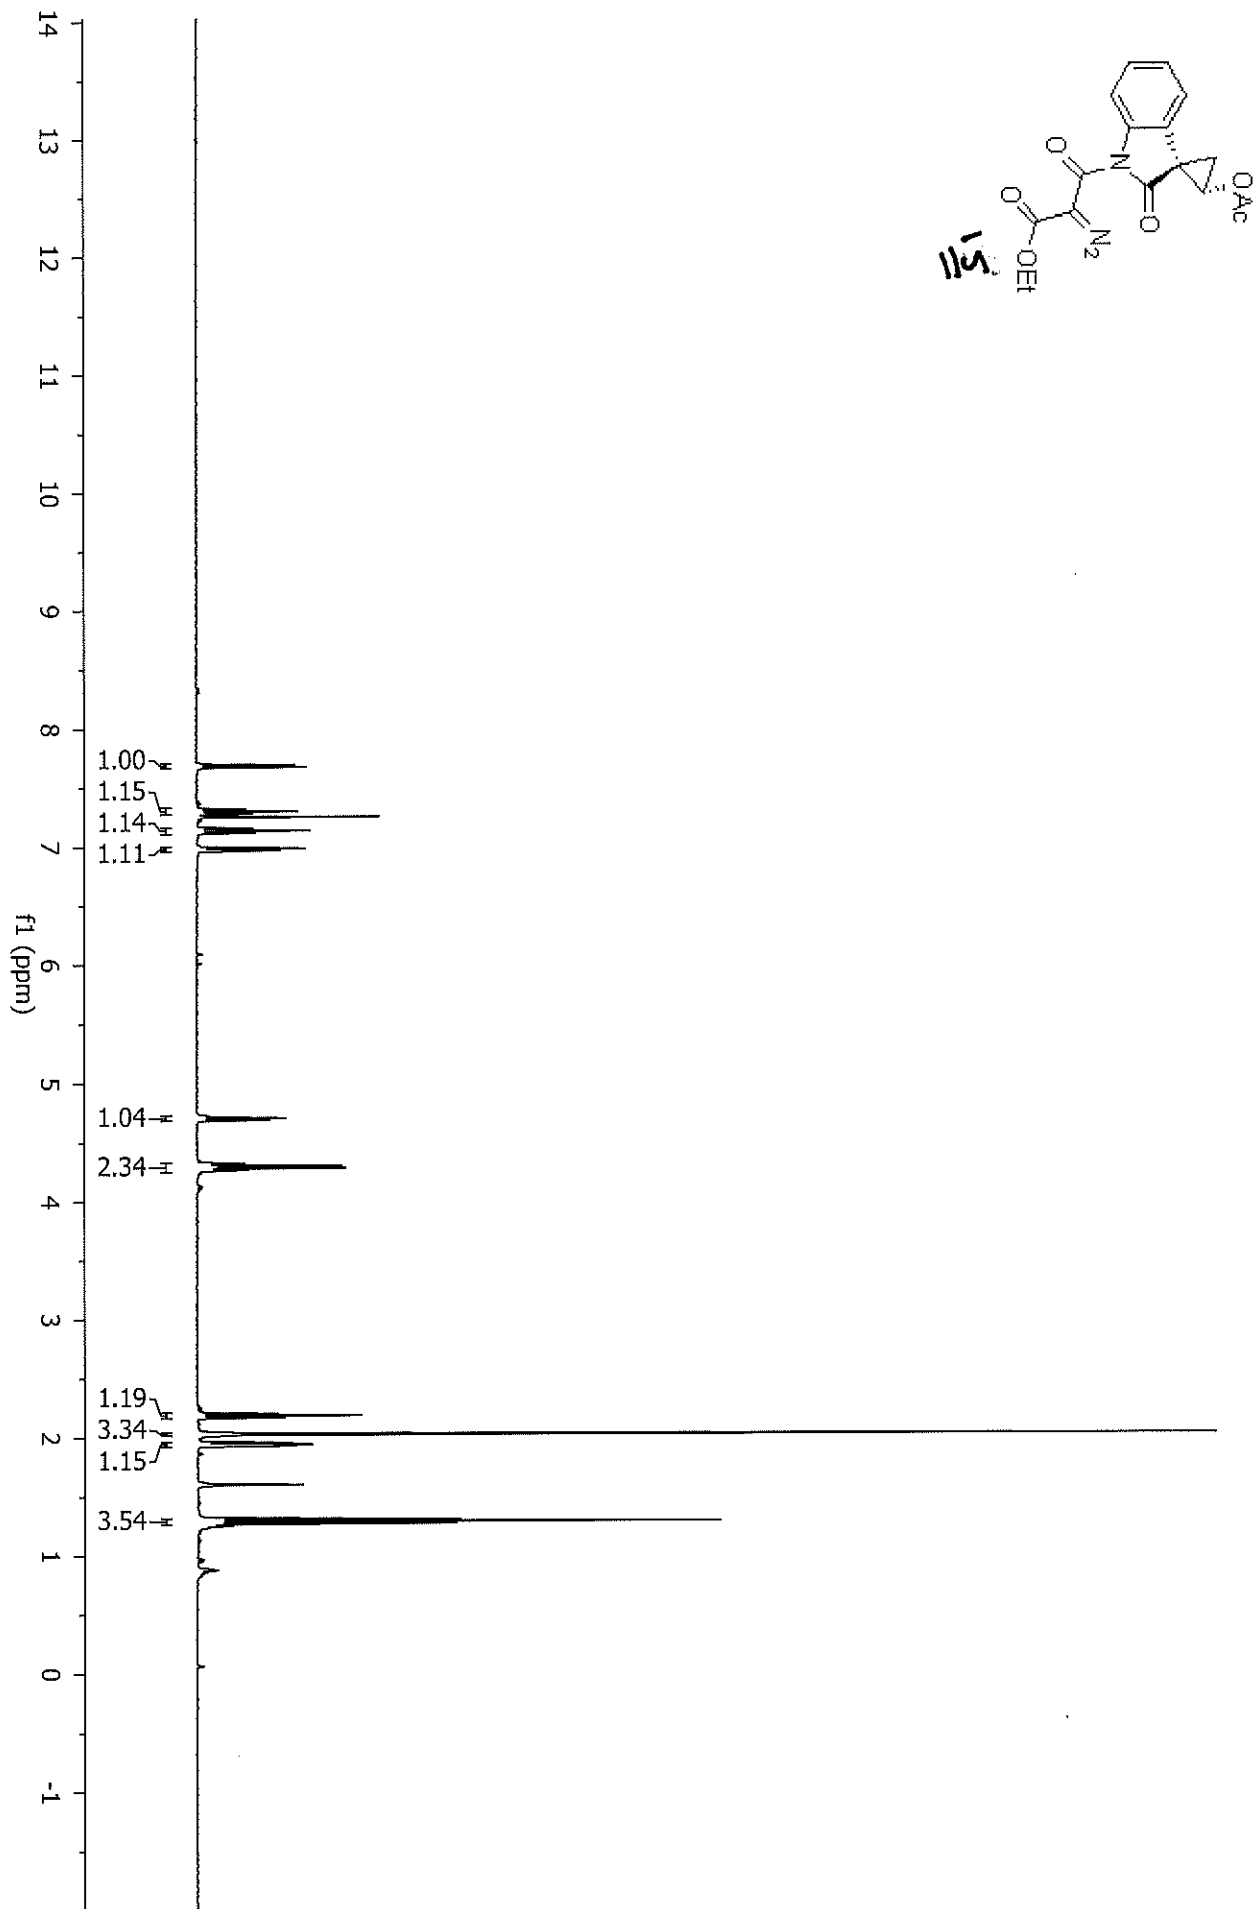

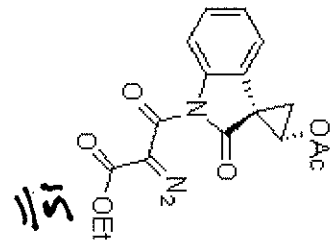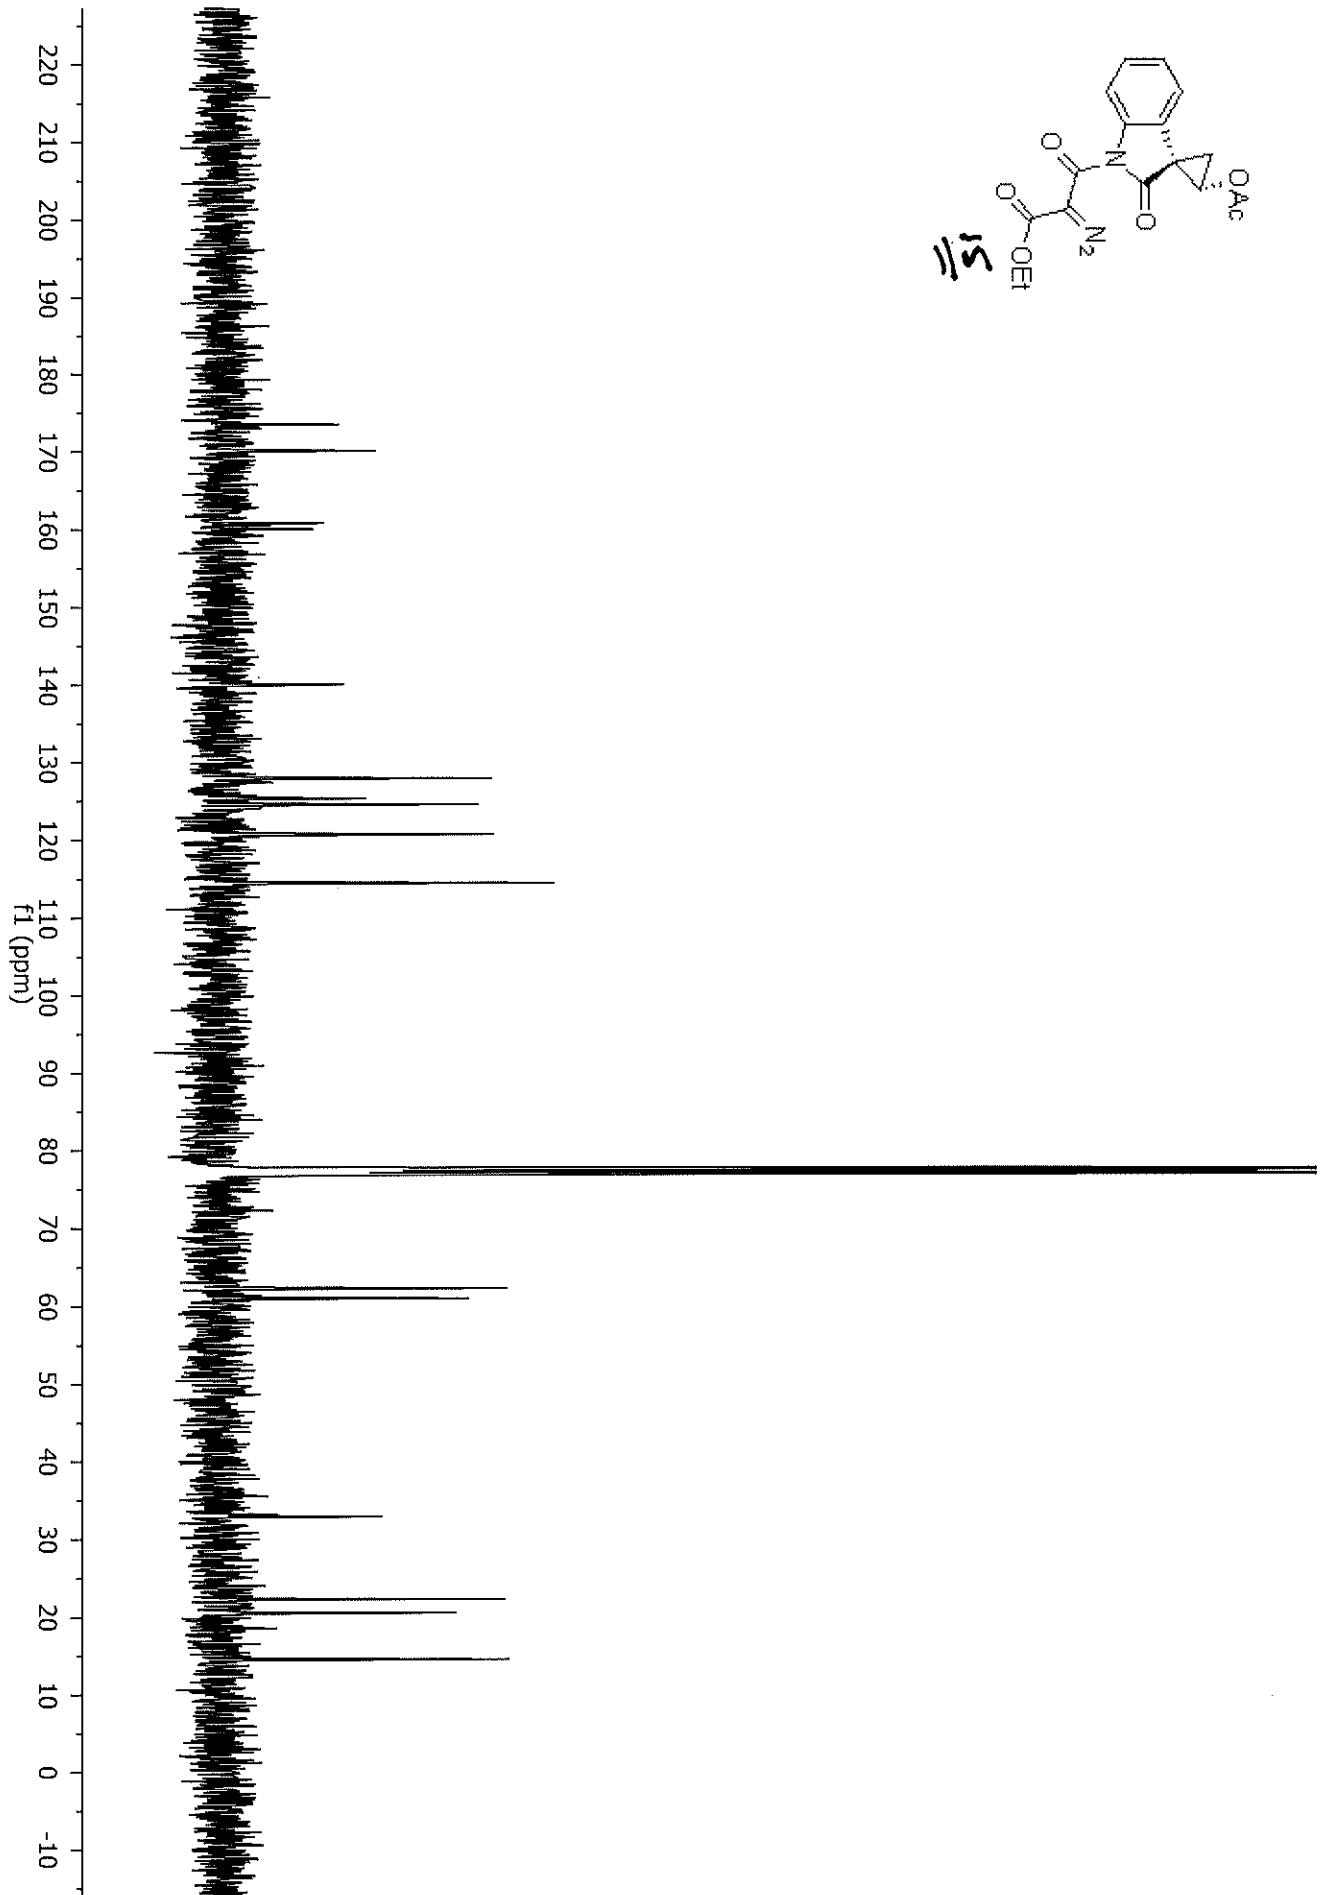

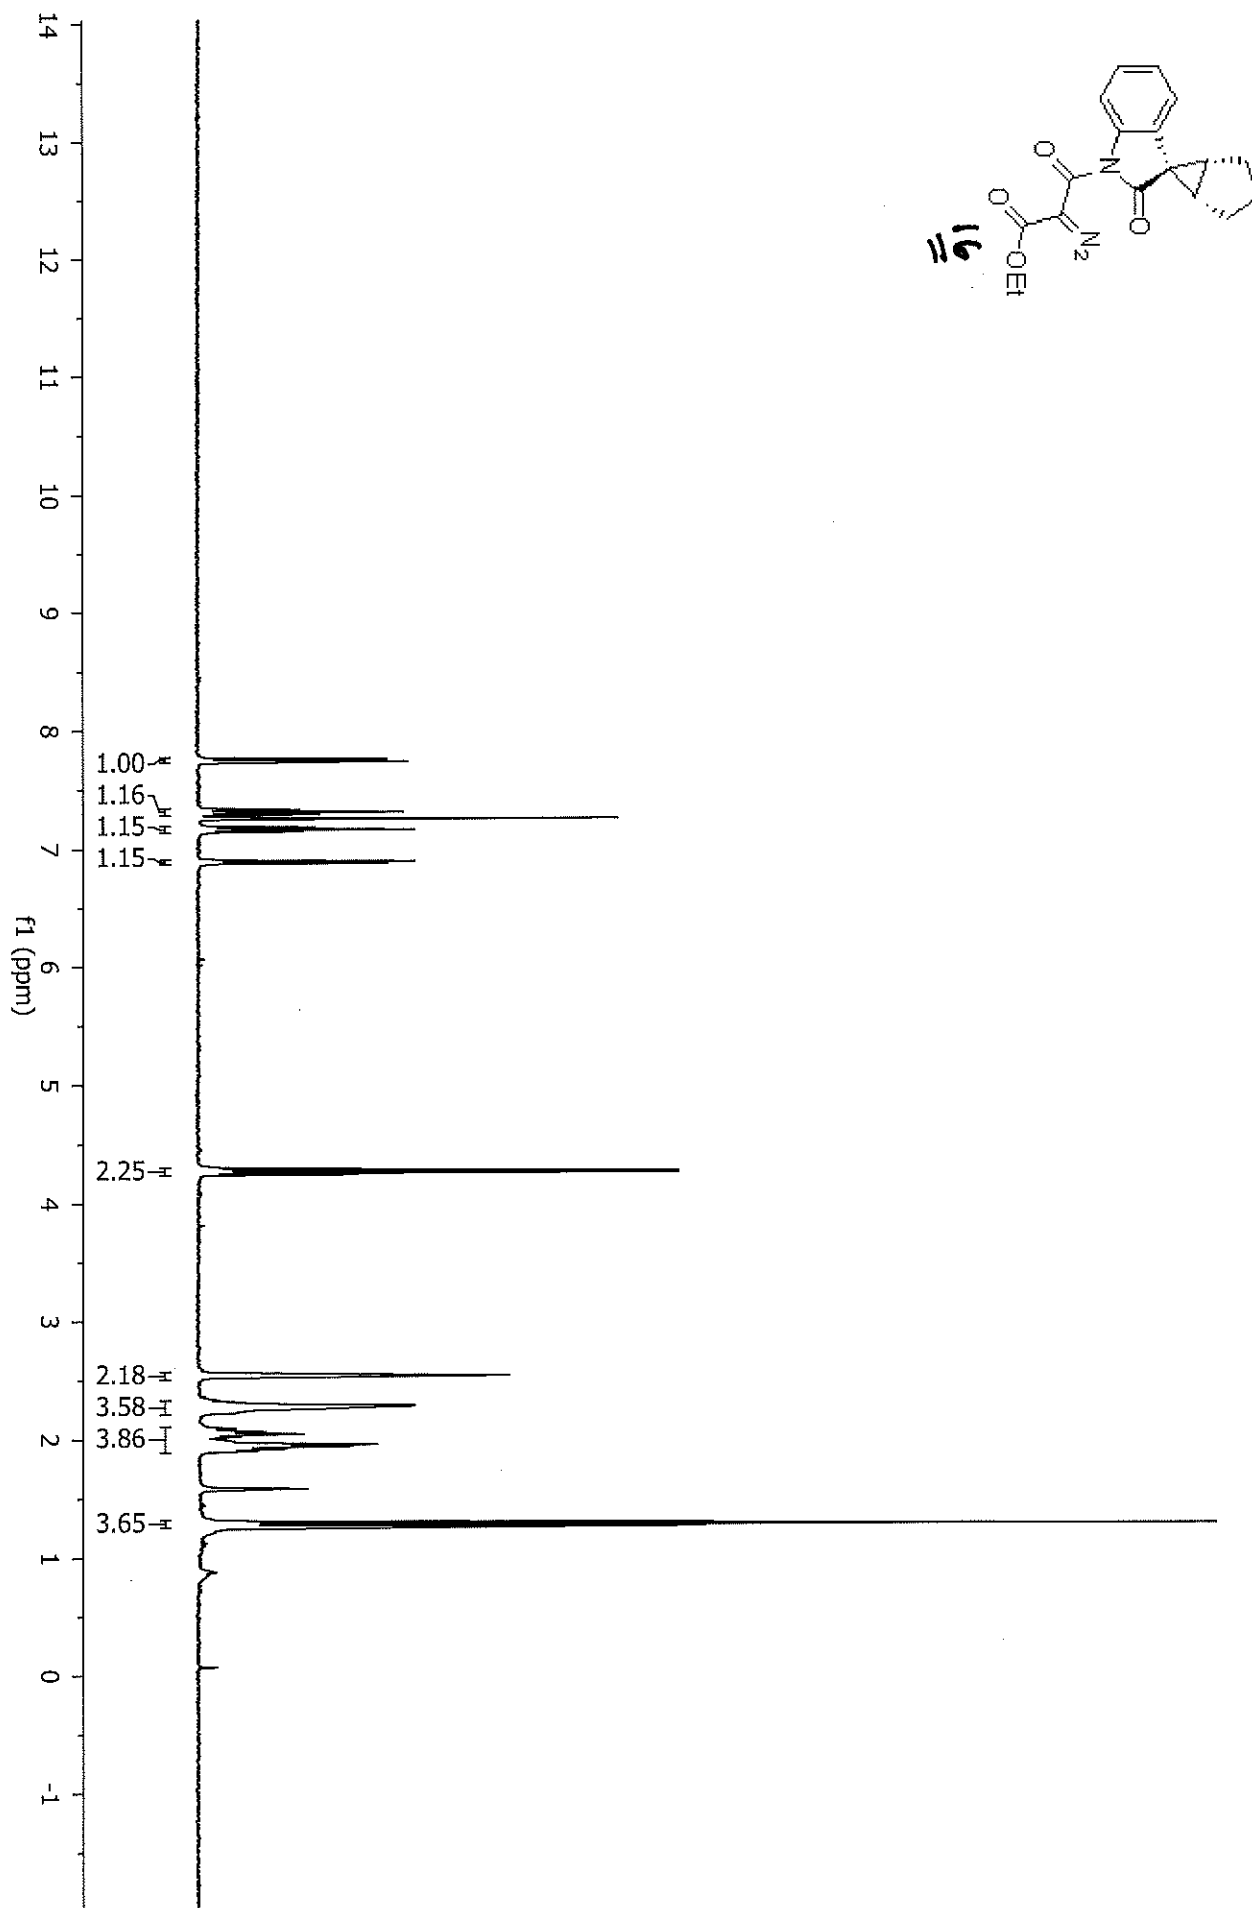

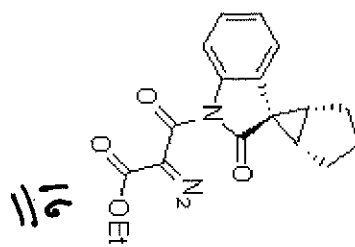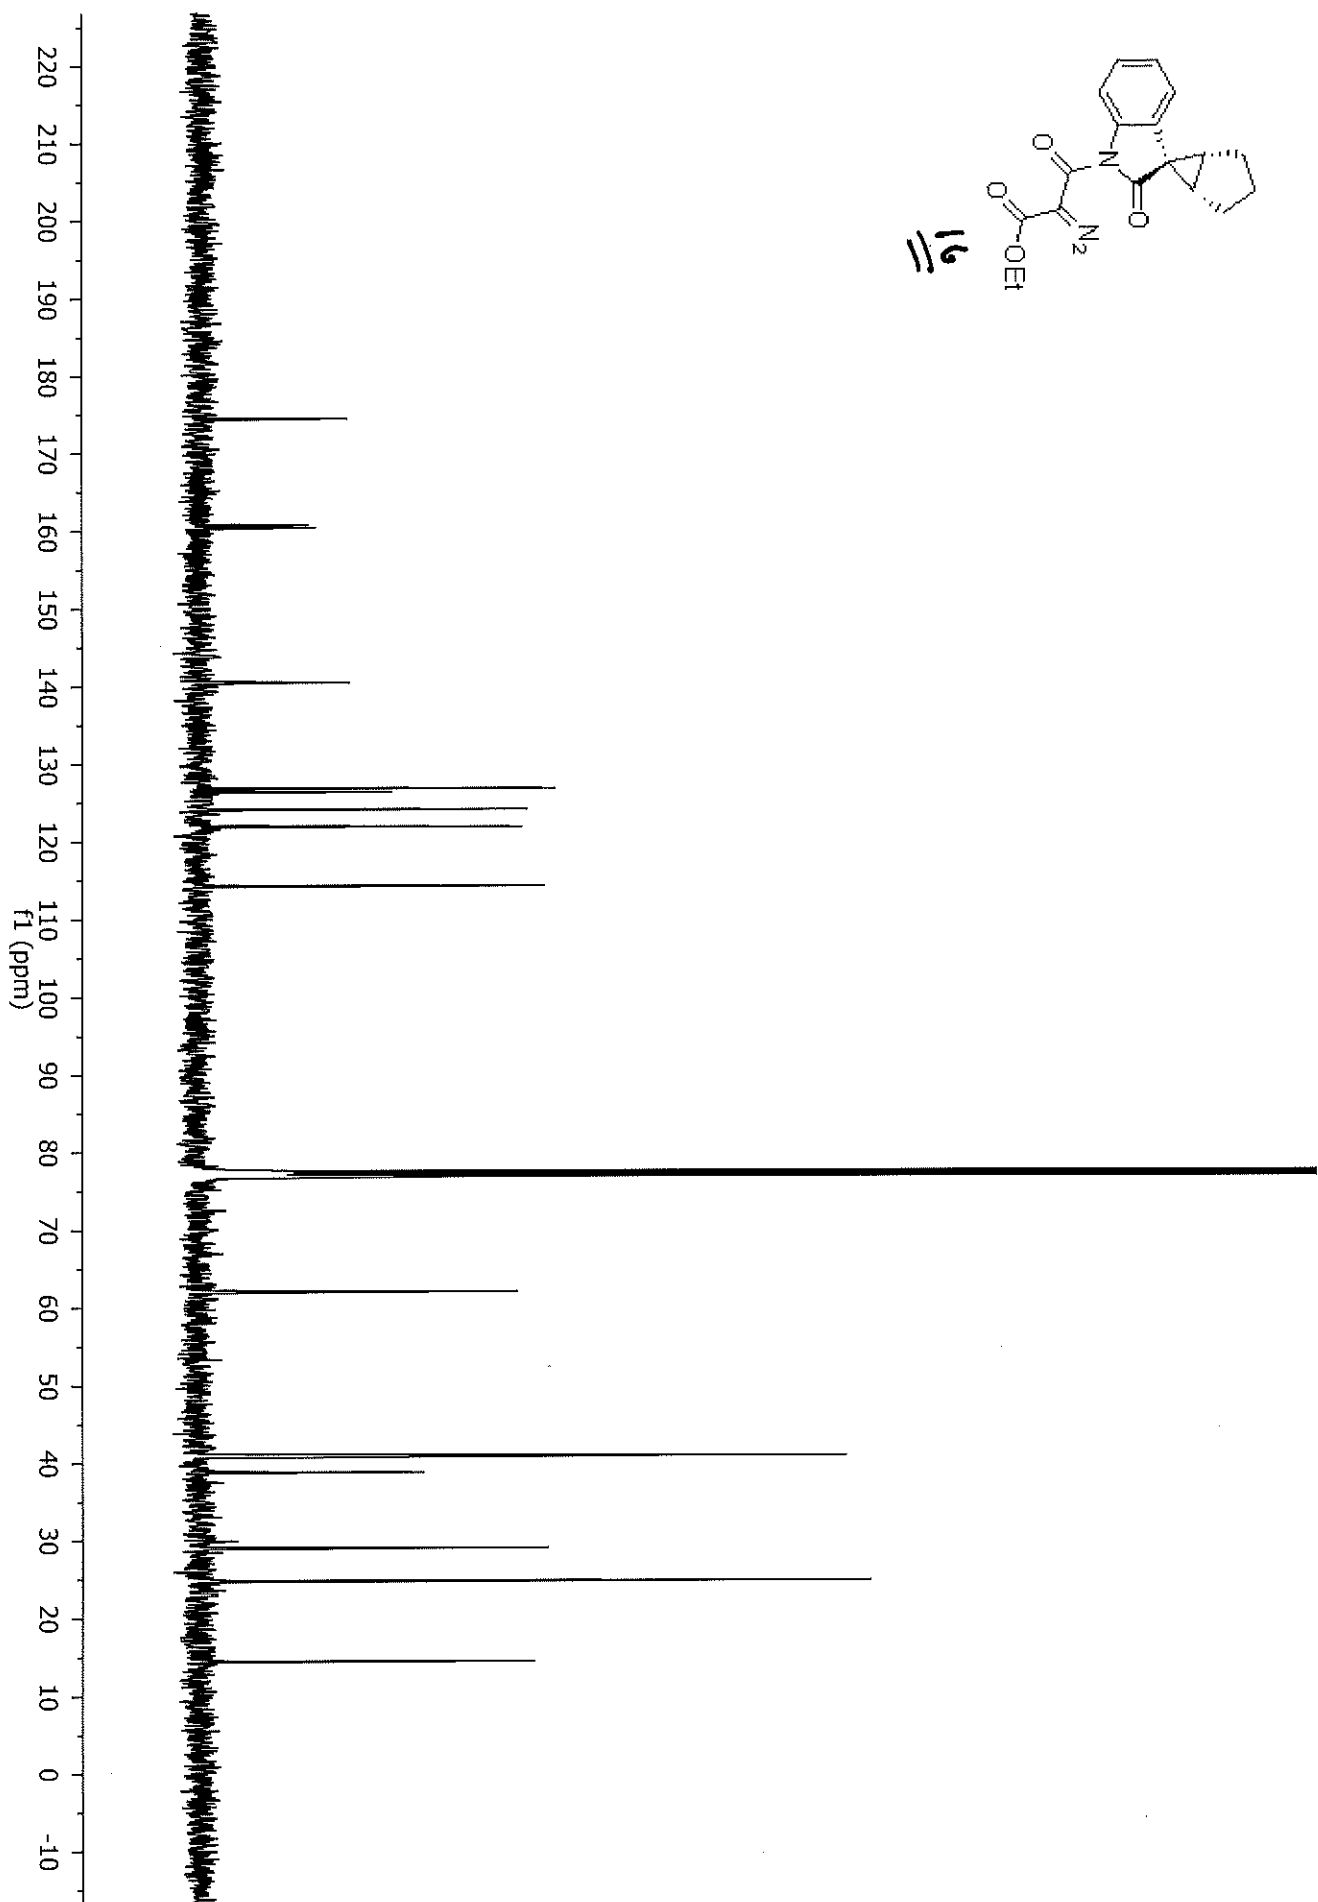



S9

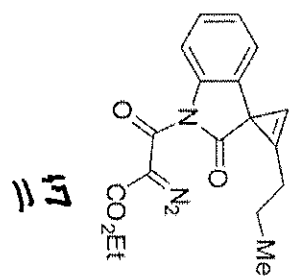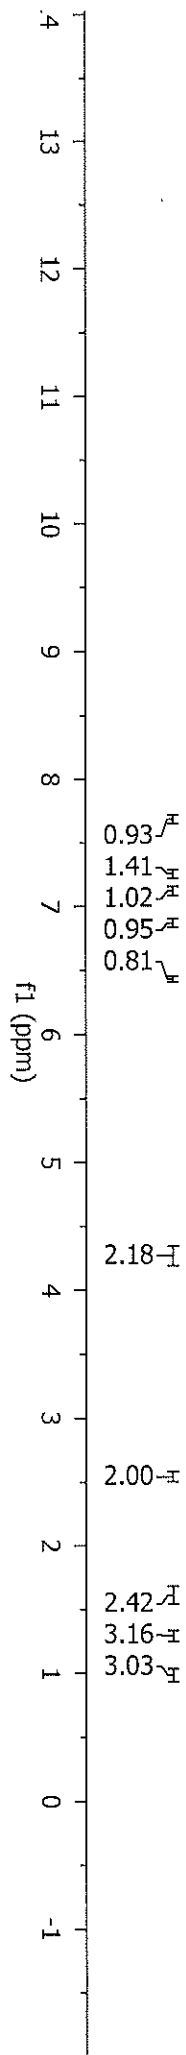

S10

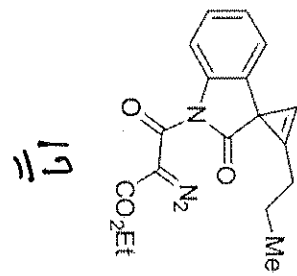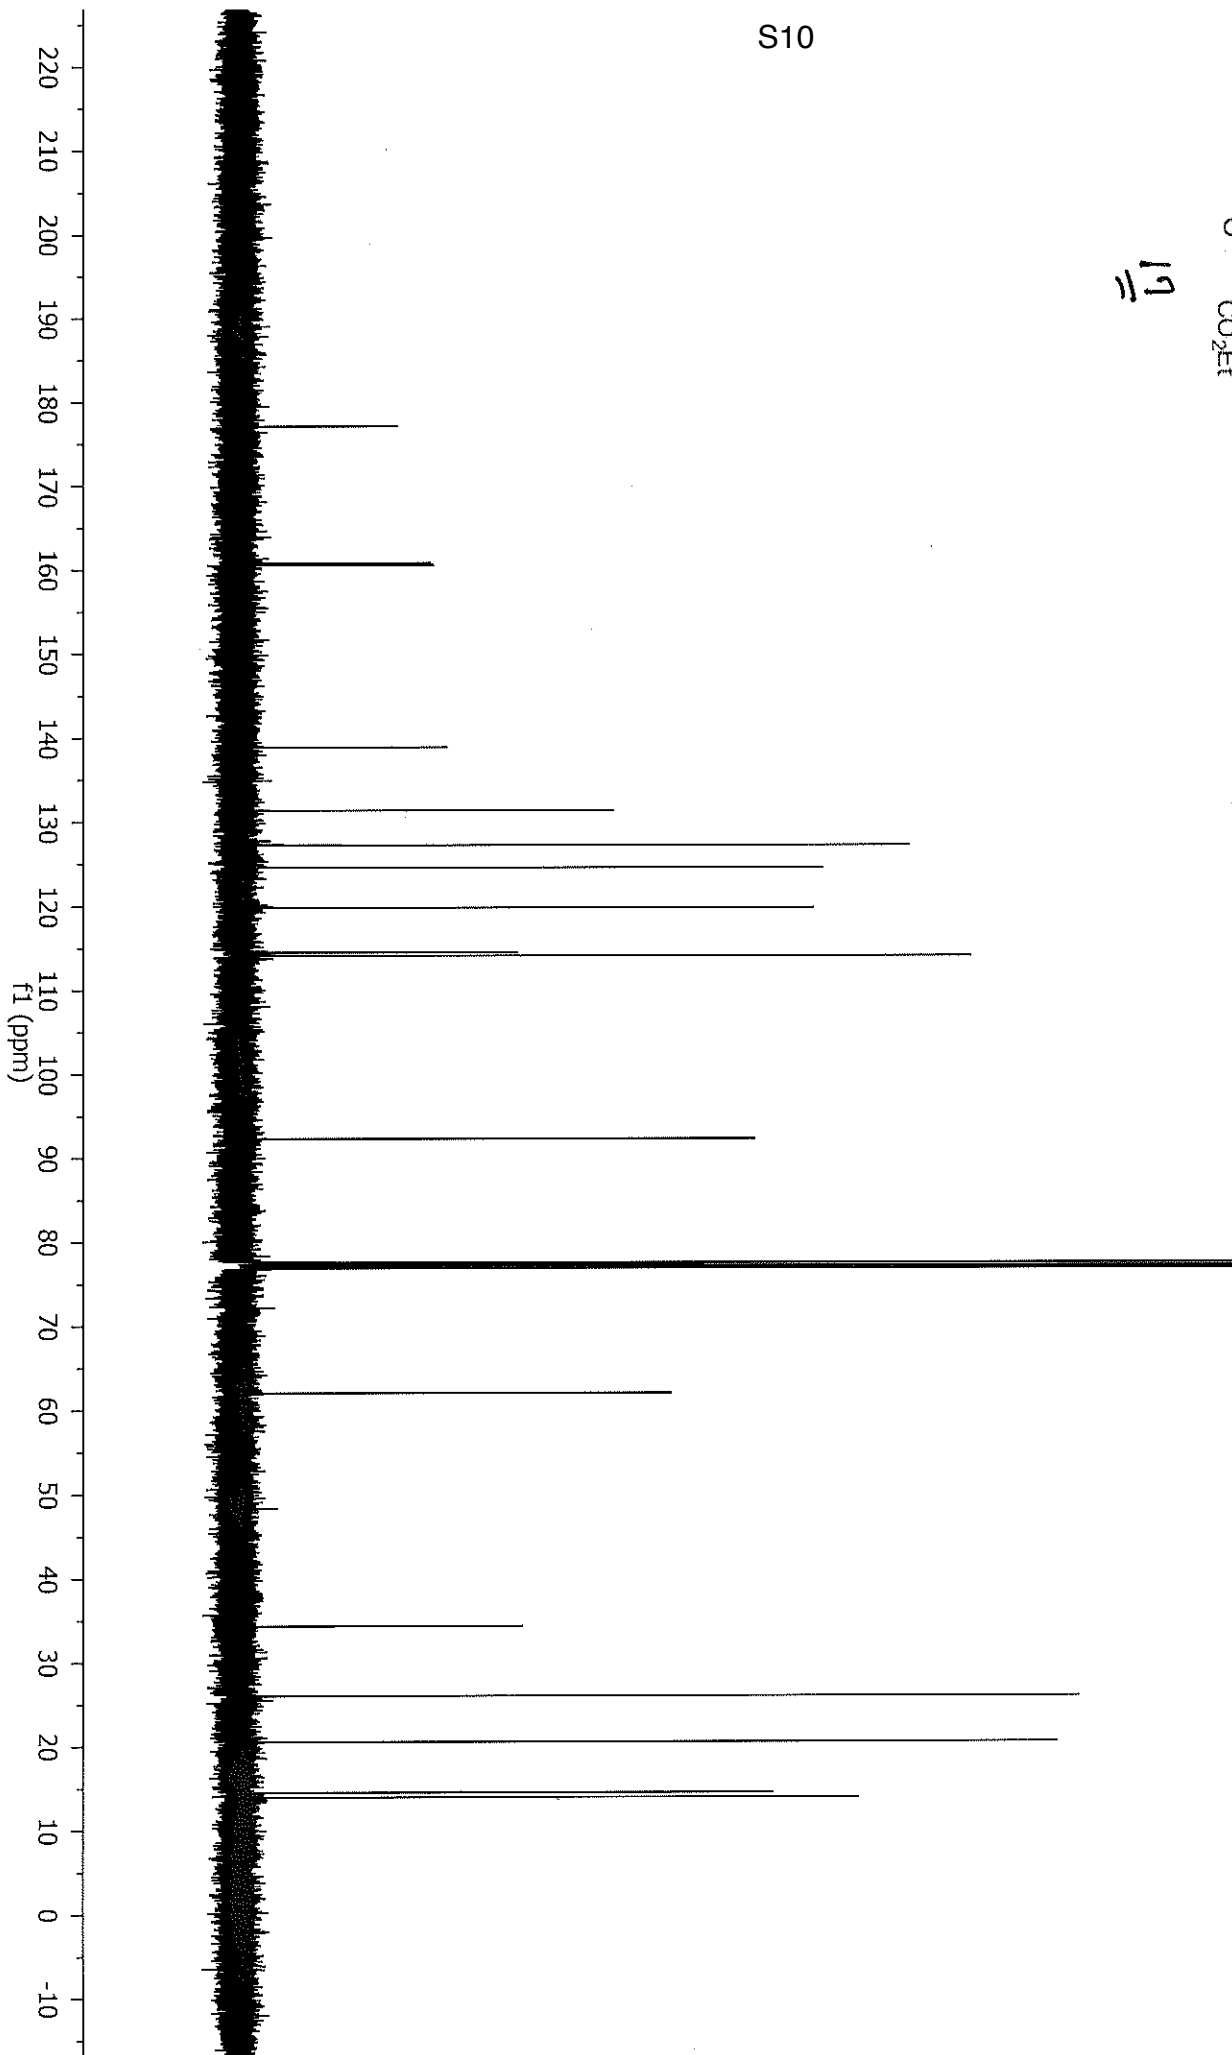

S11

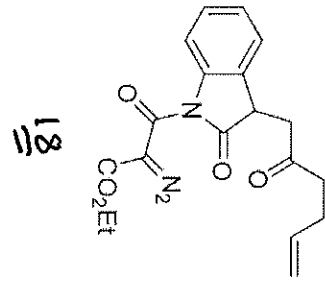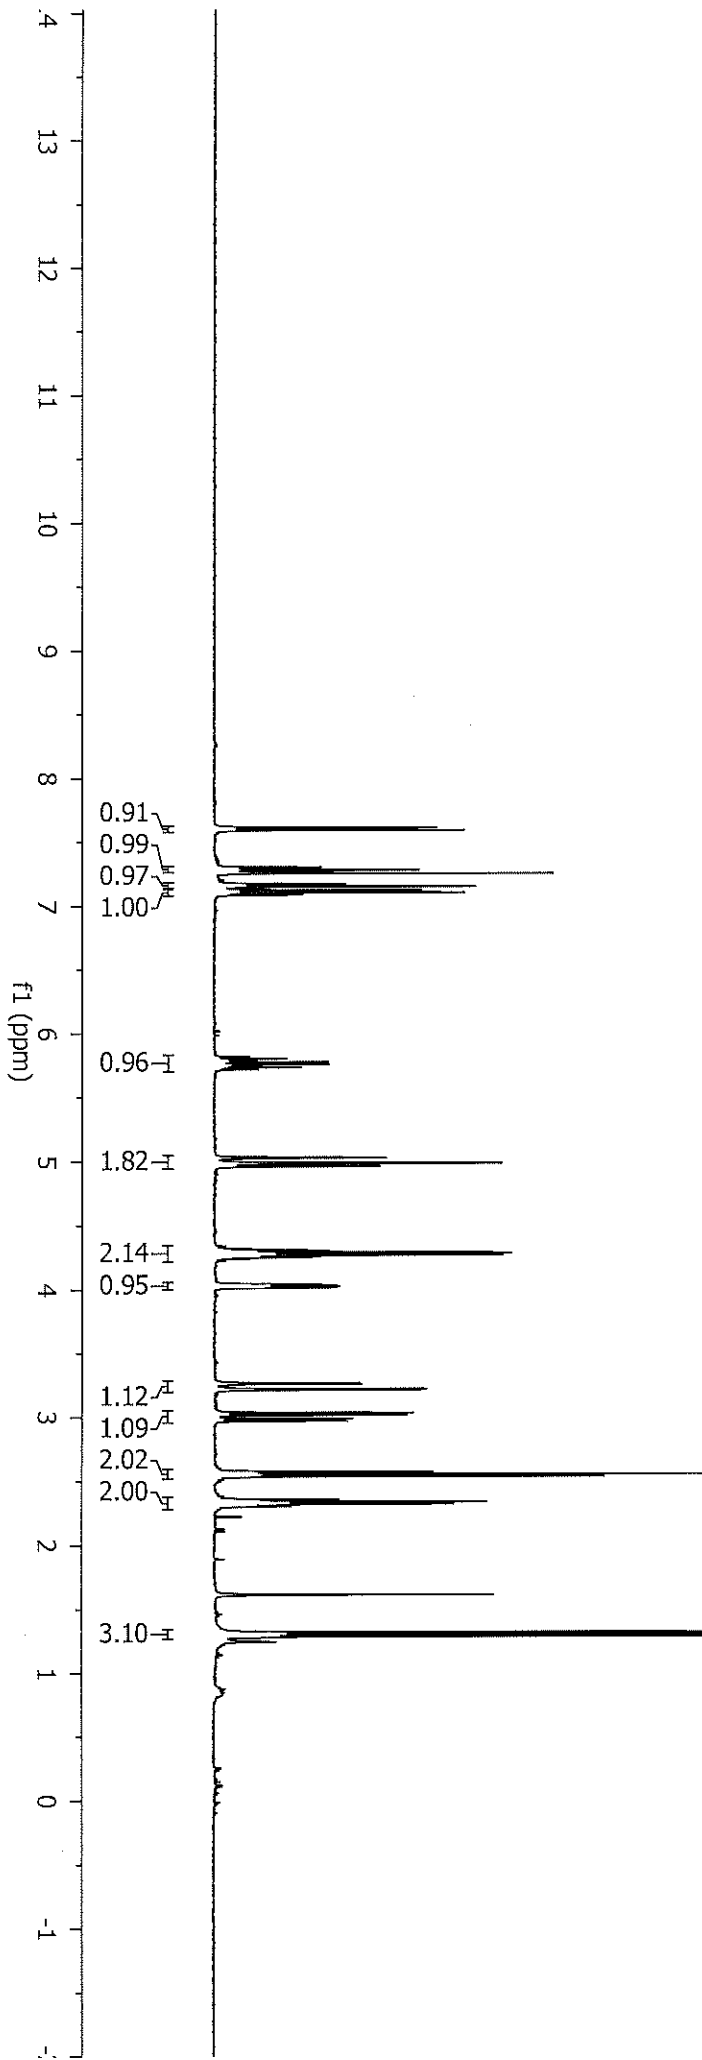

S12

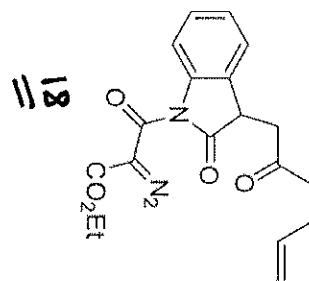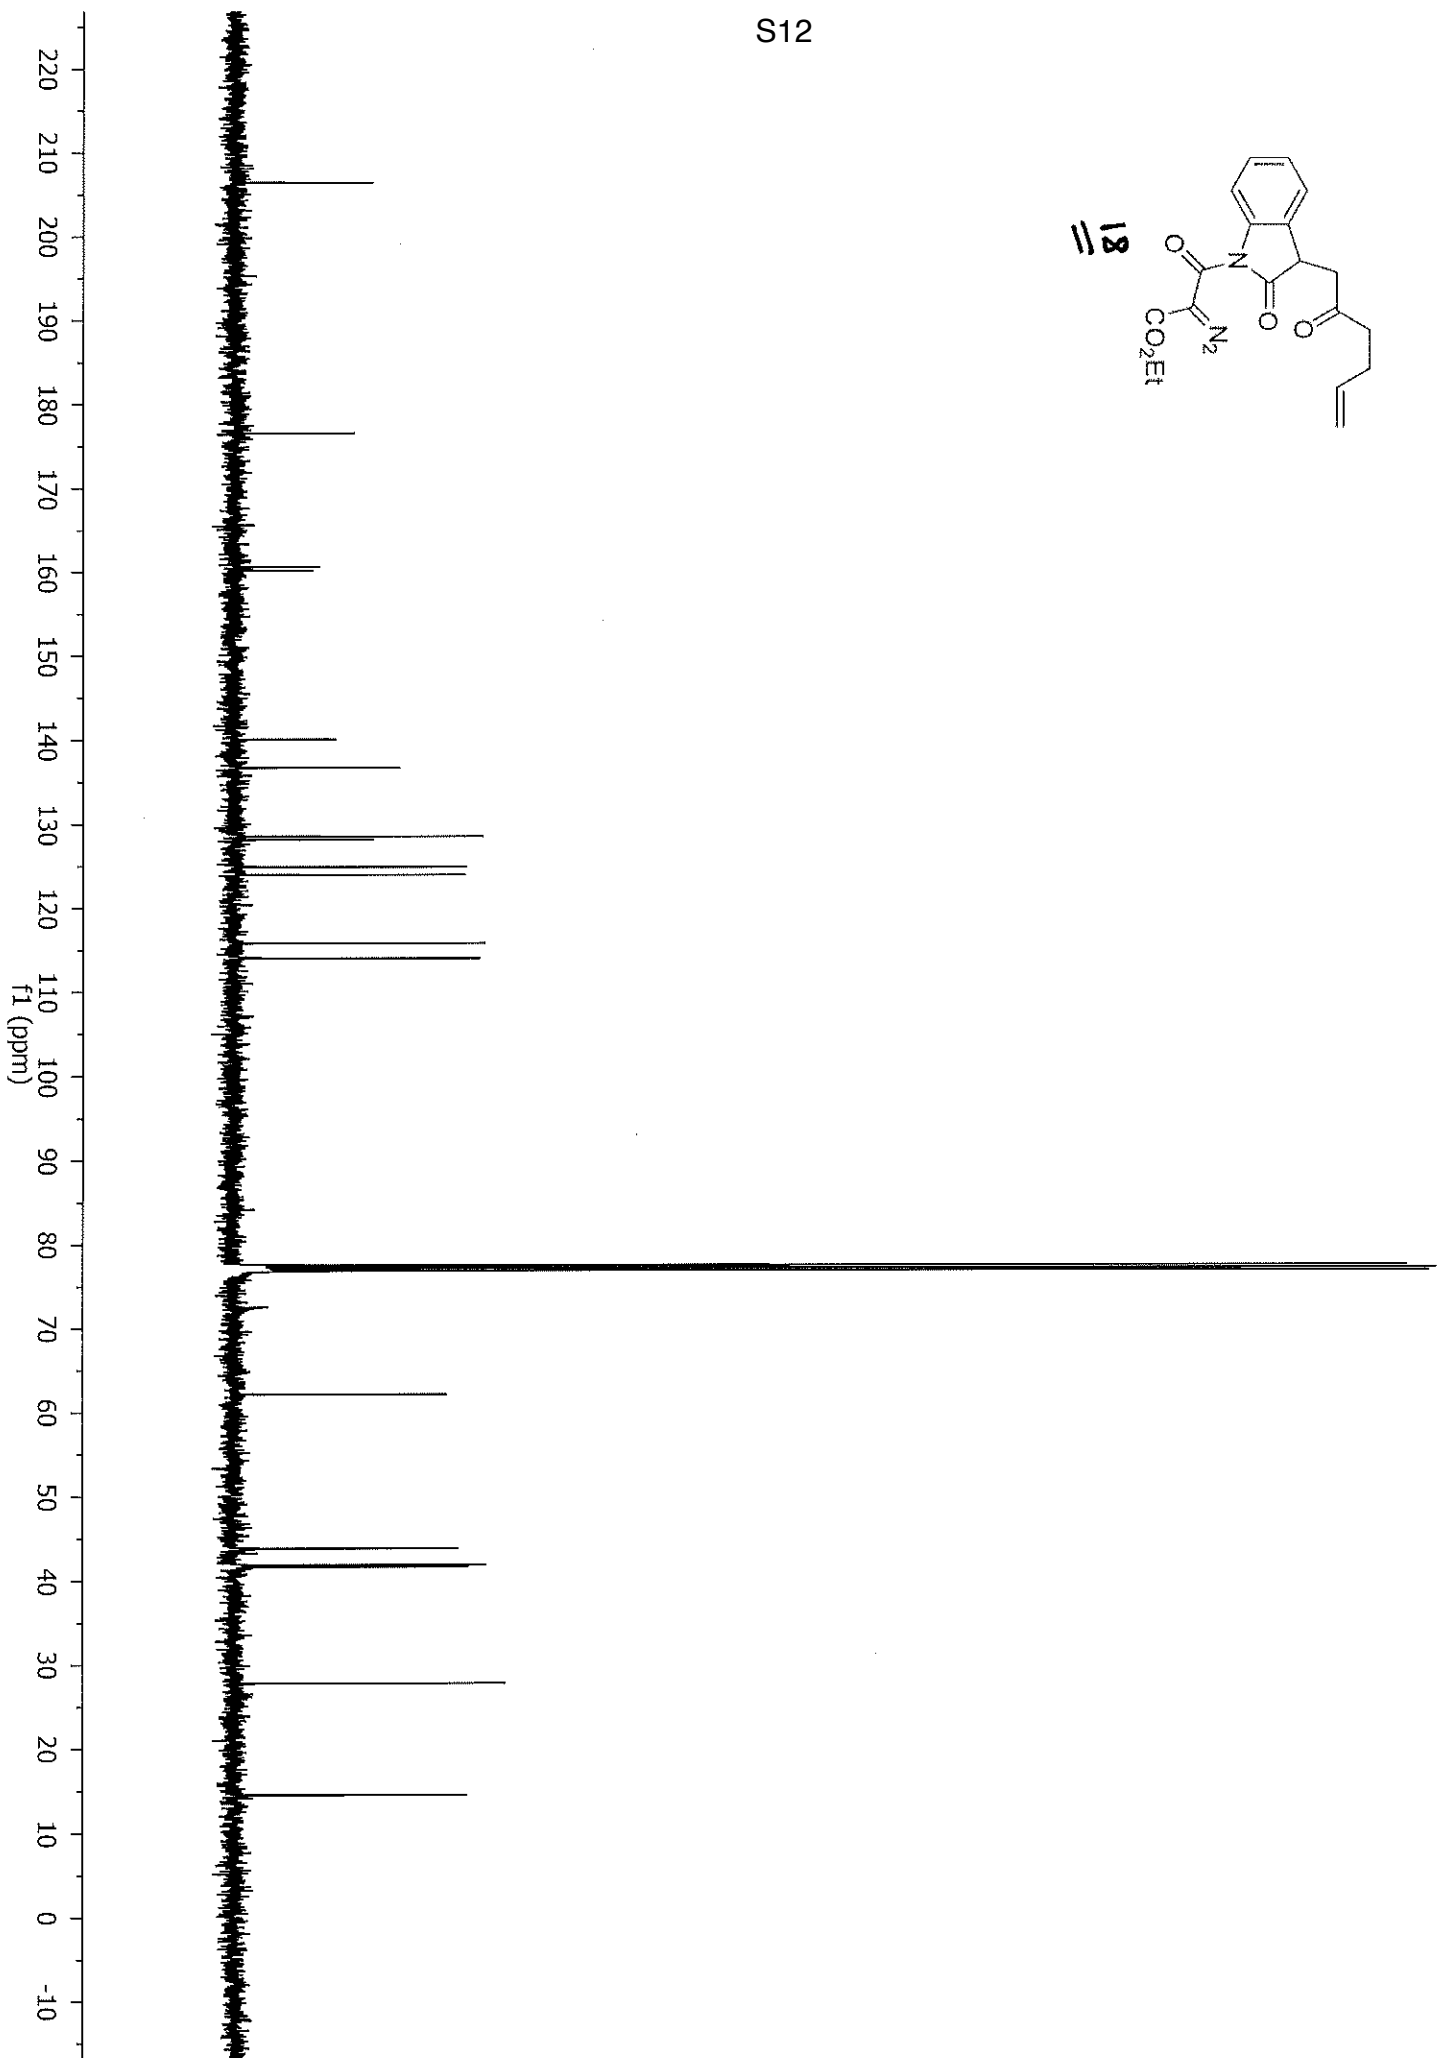

S13

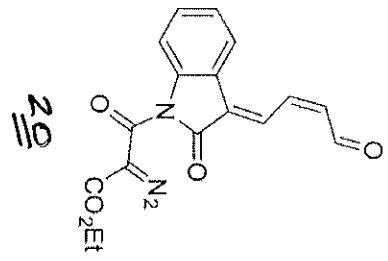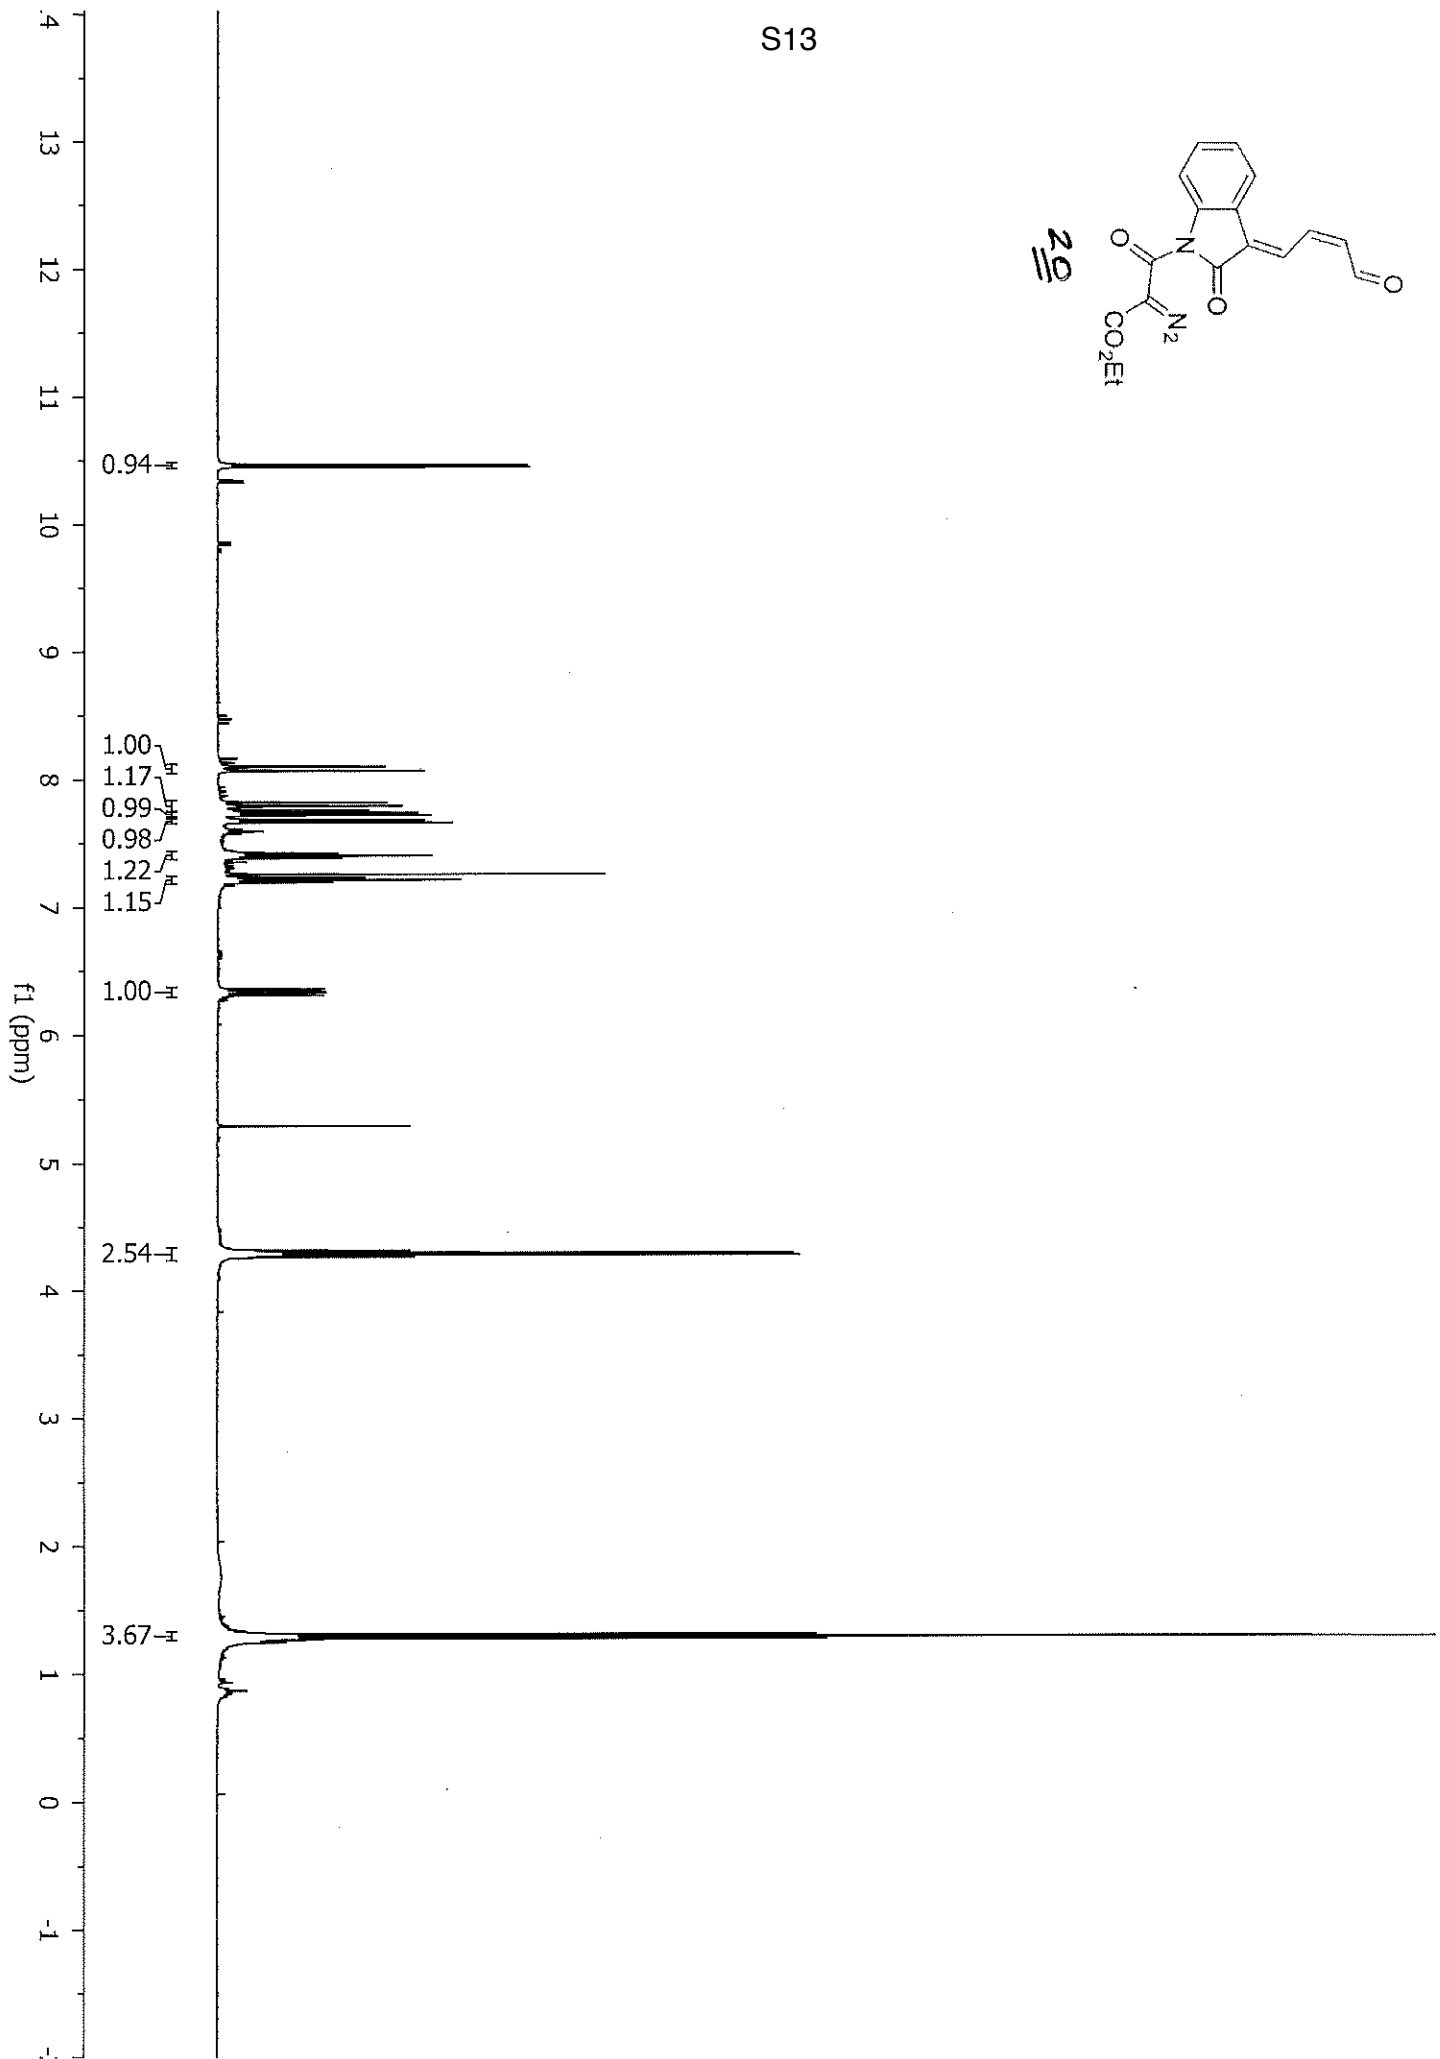

S14

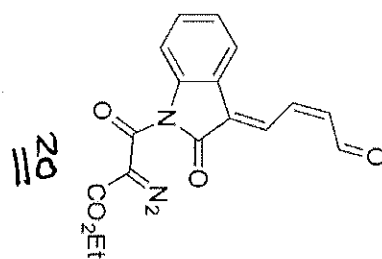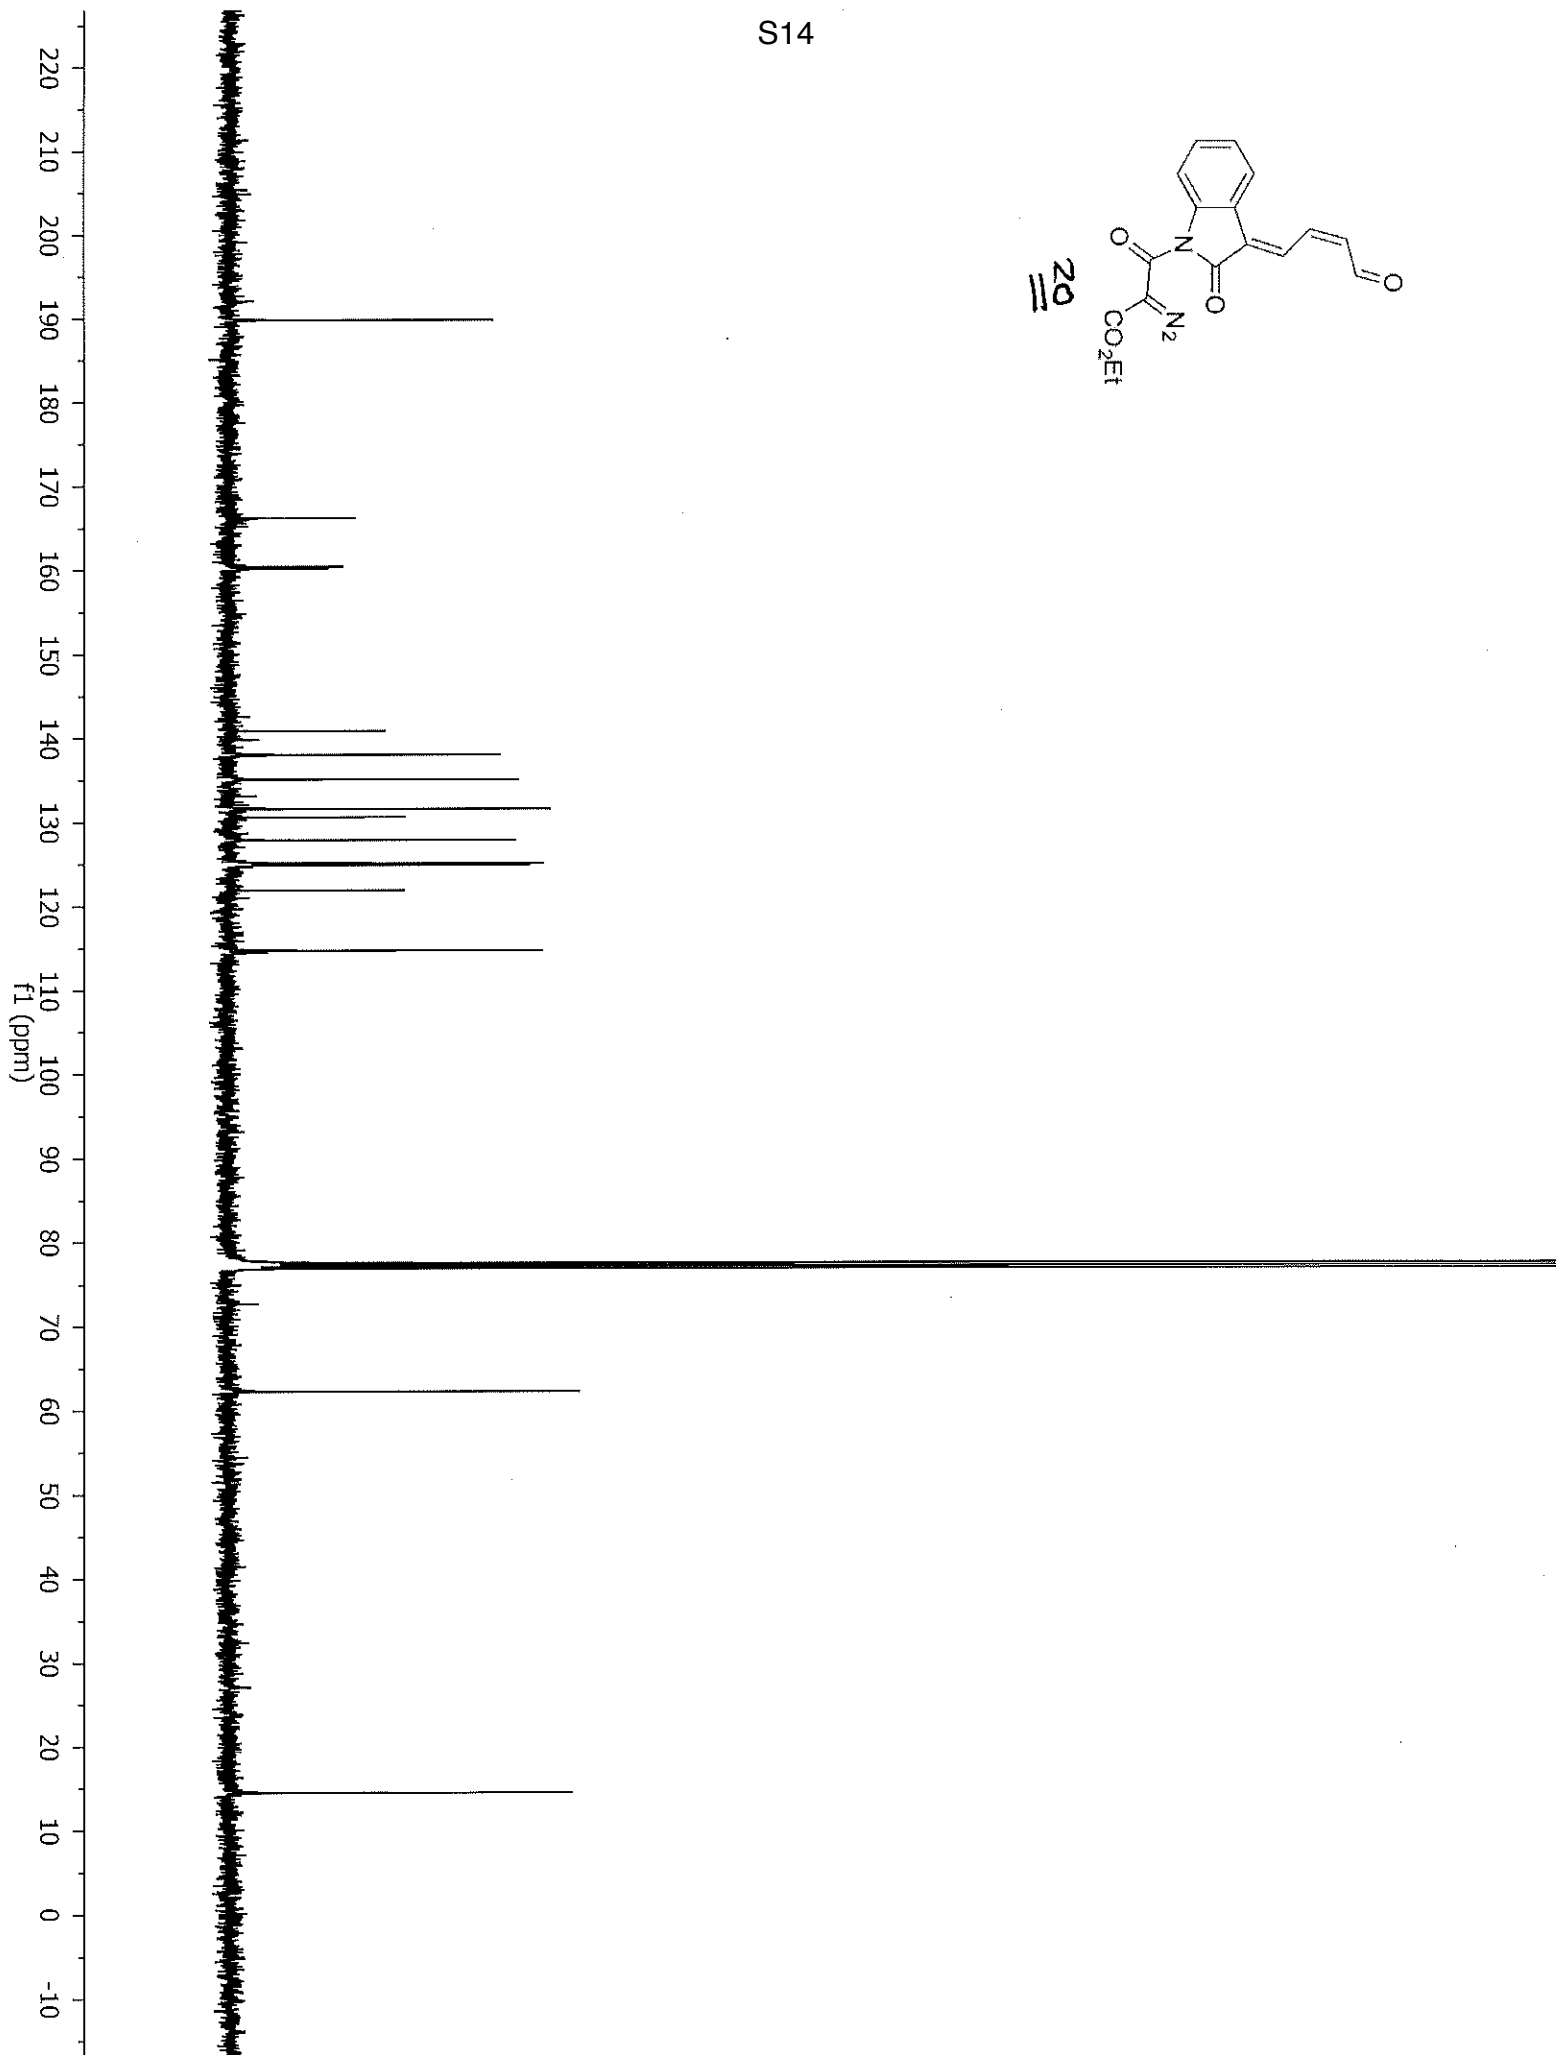

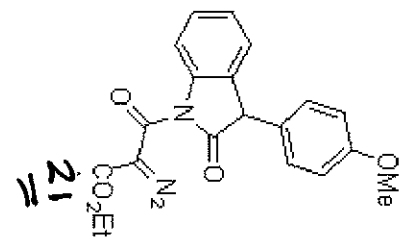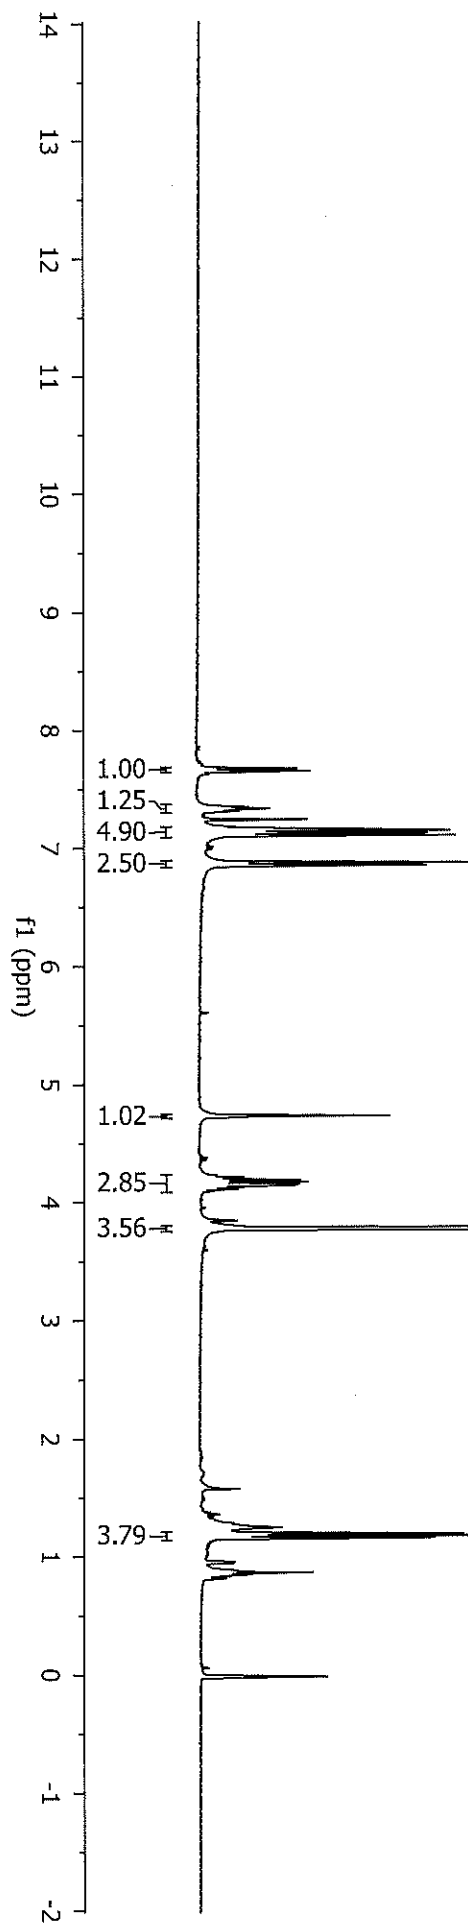

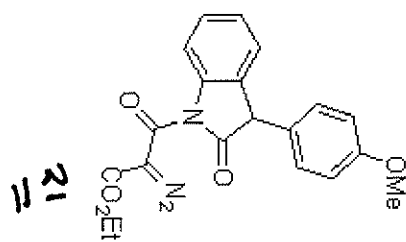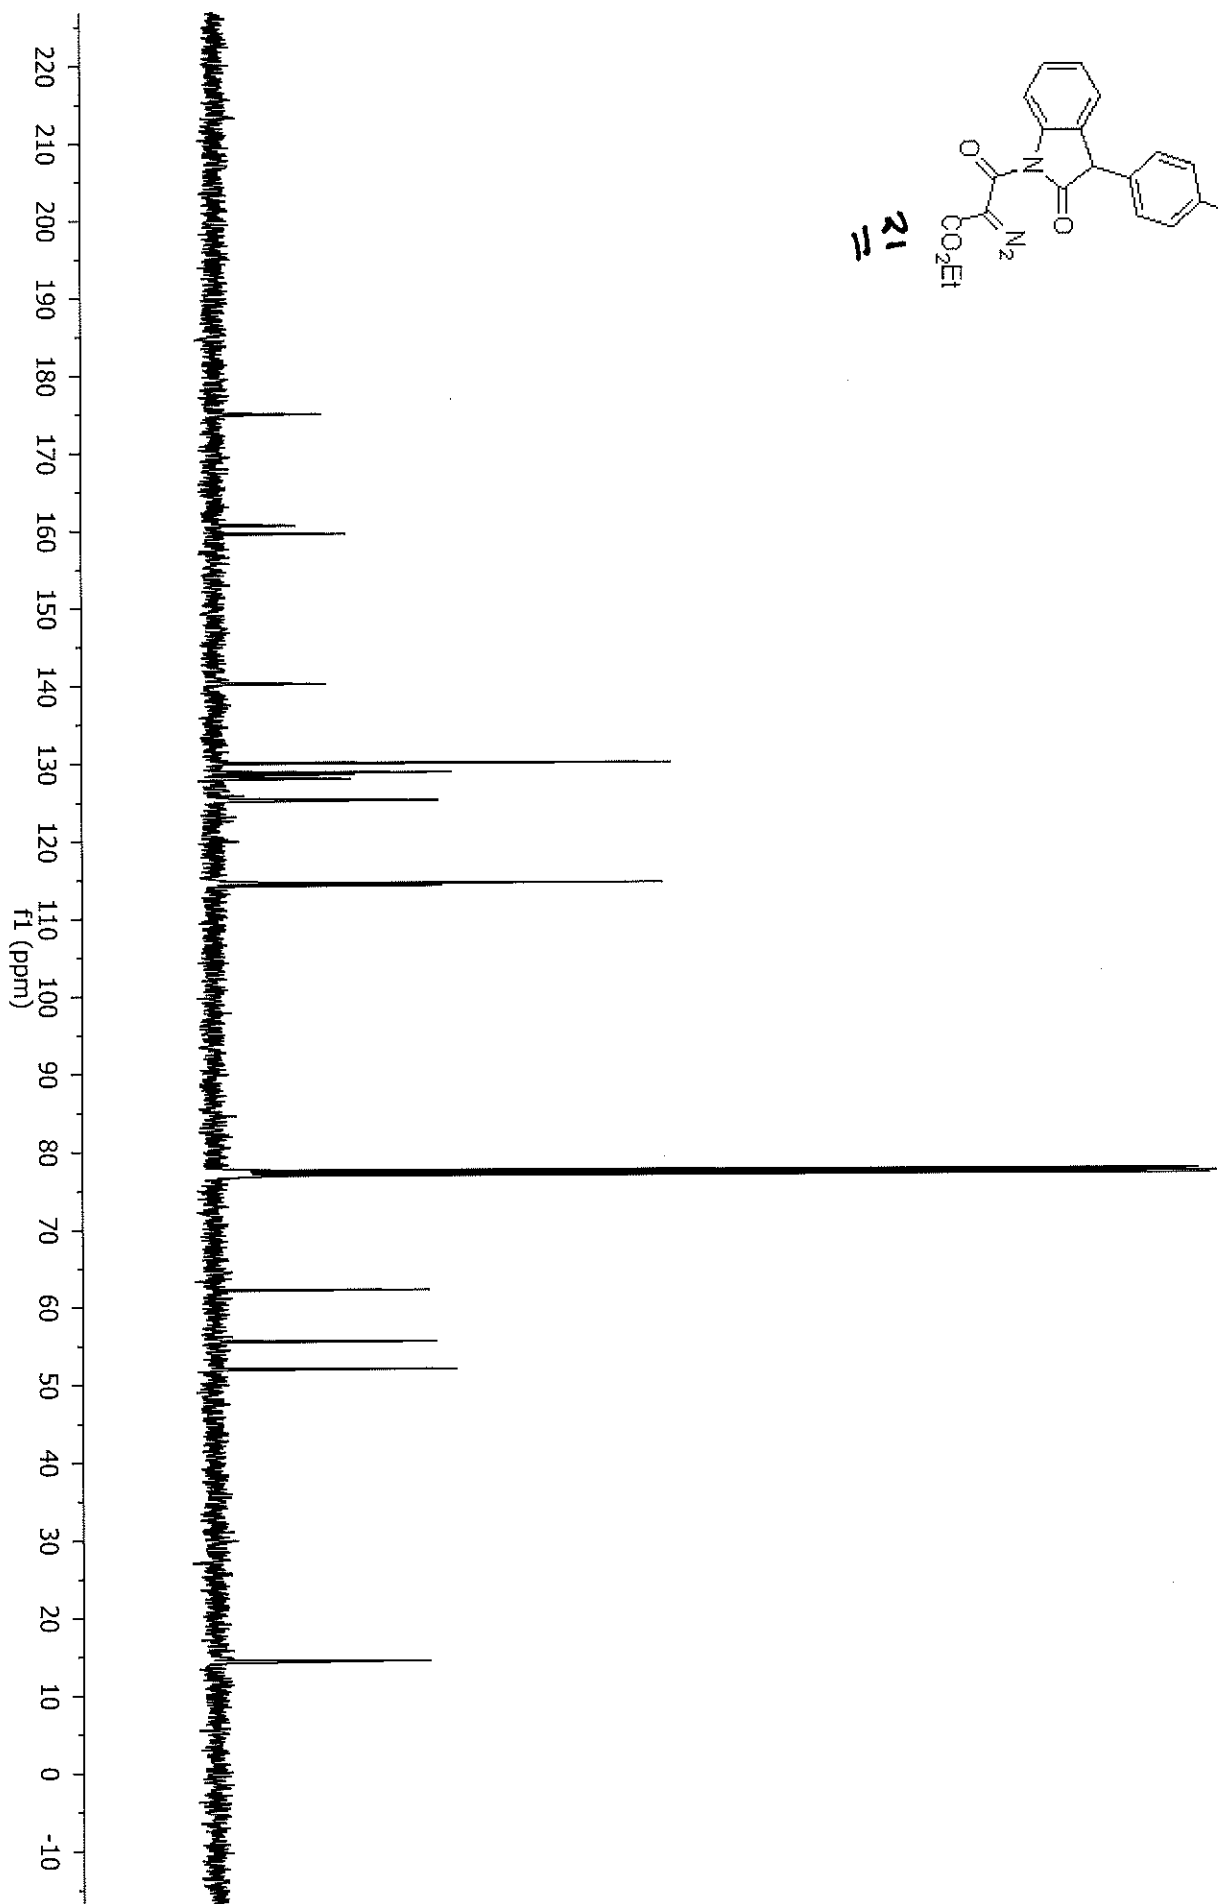



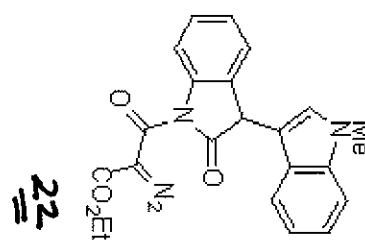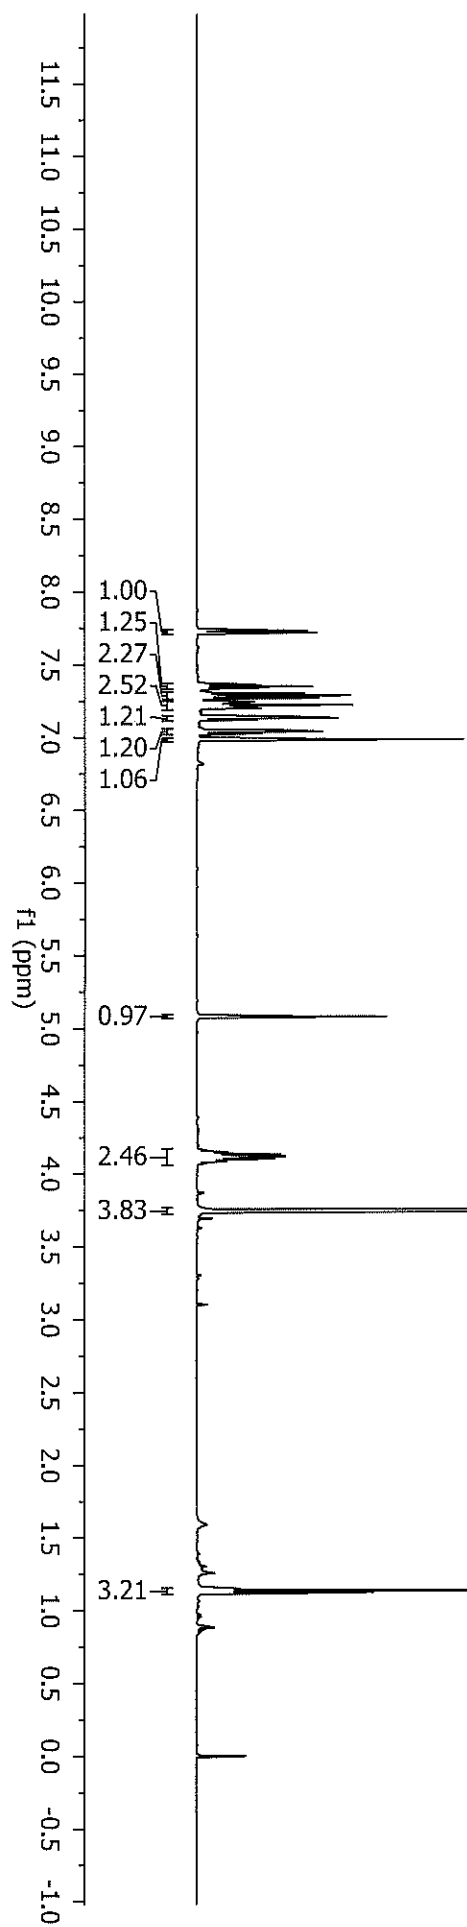

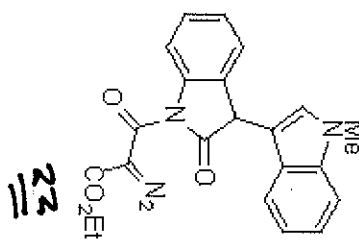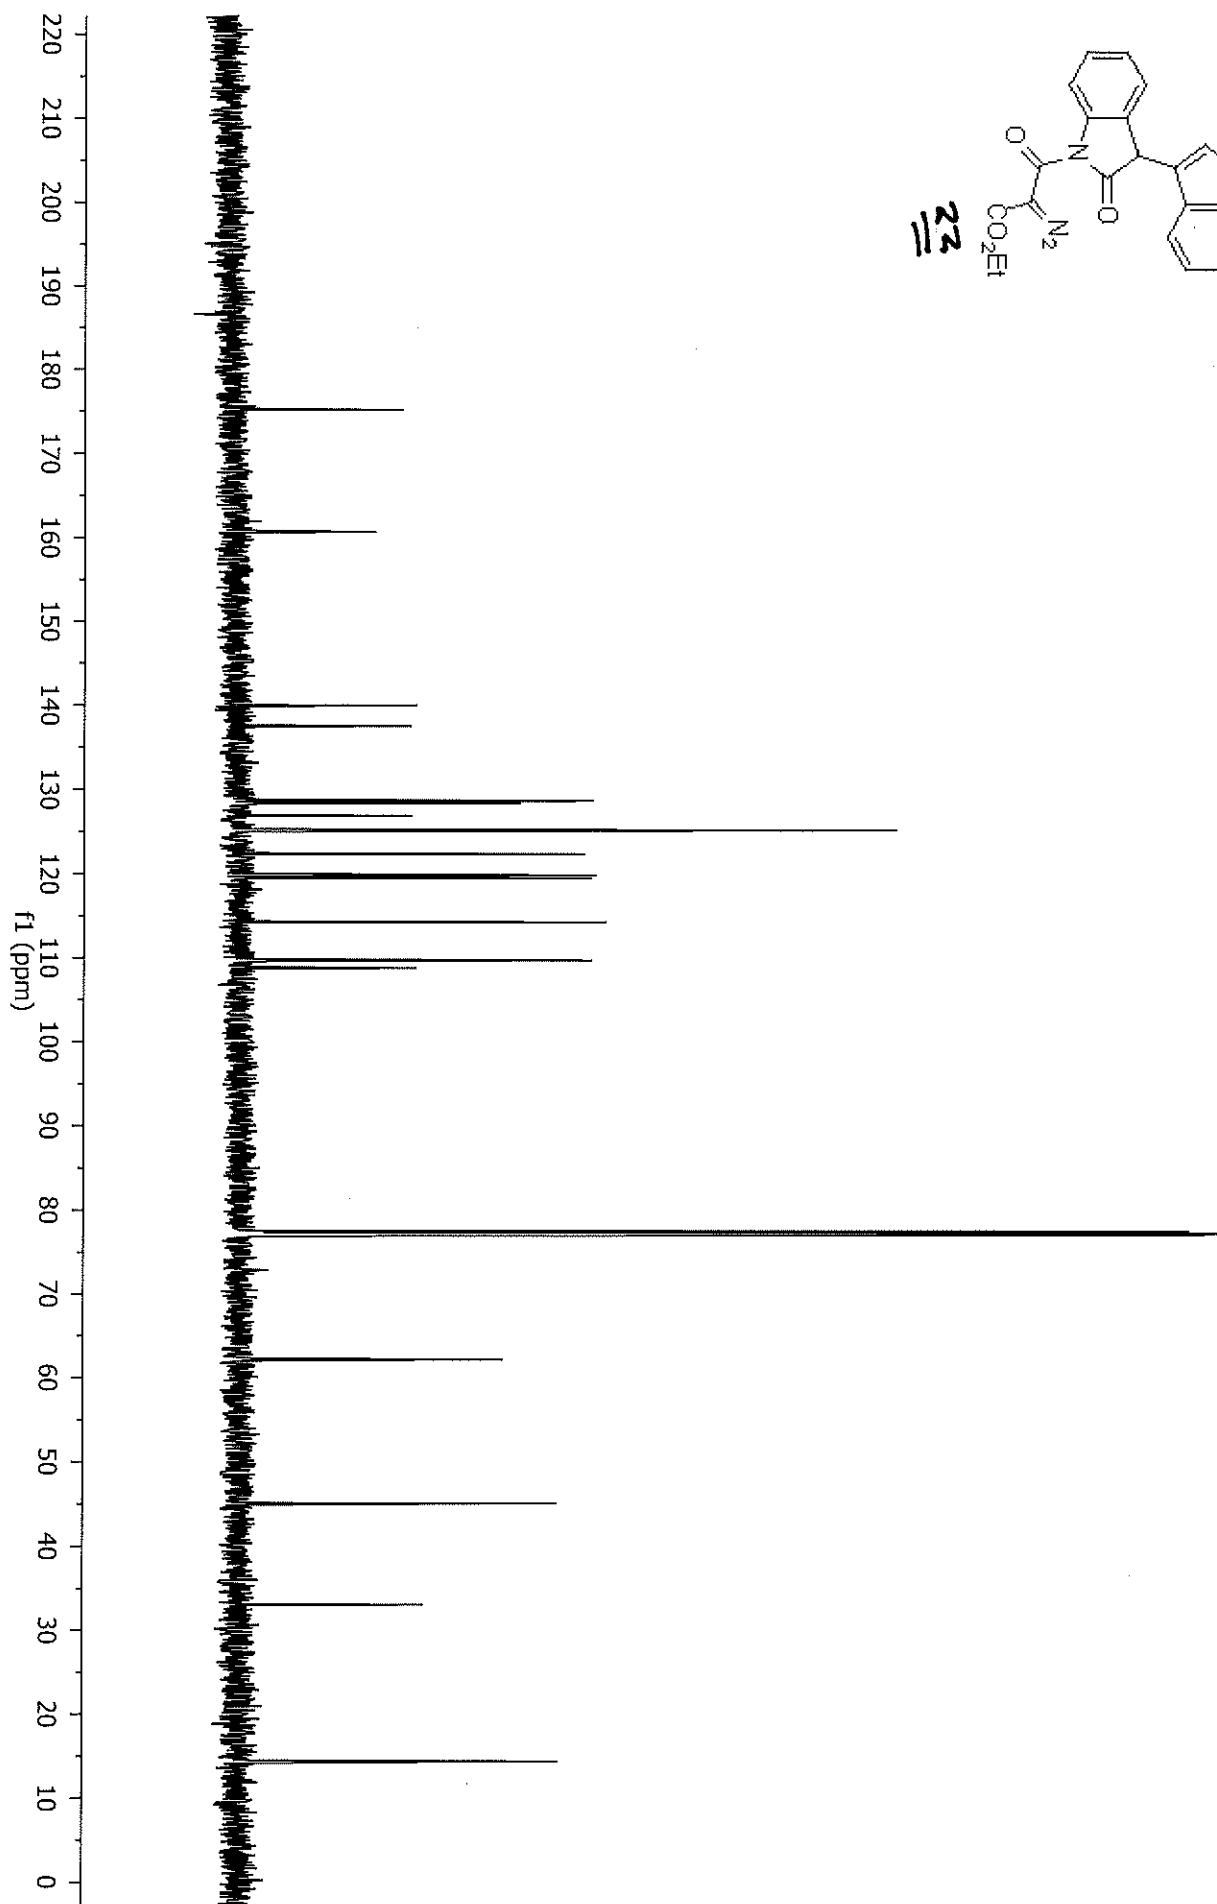

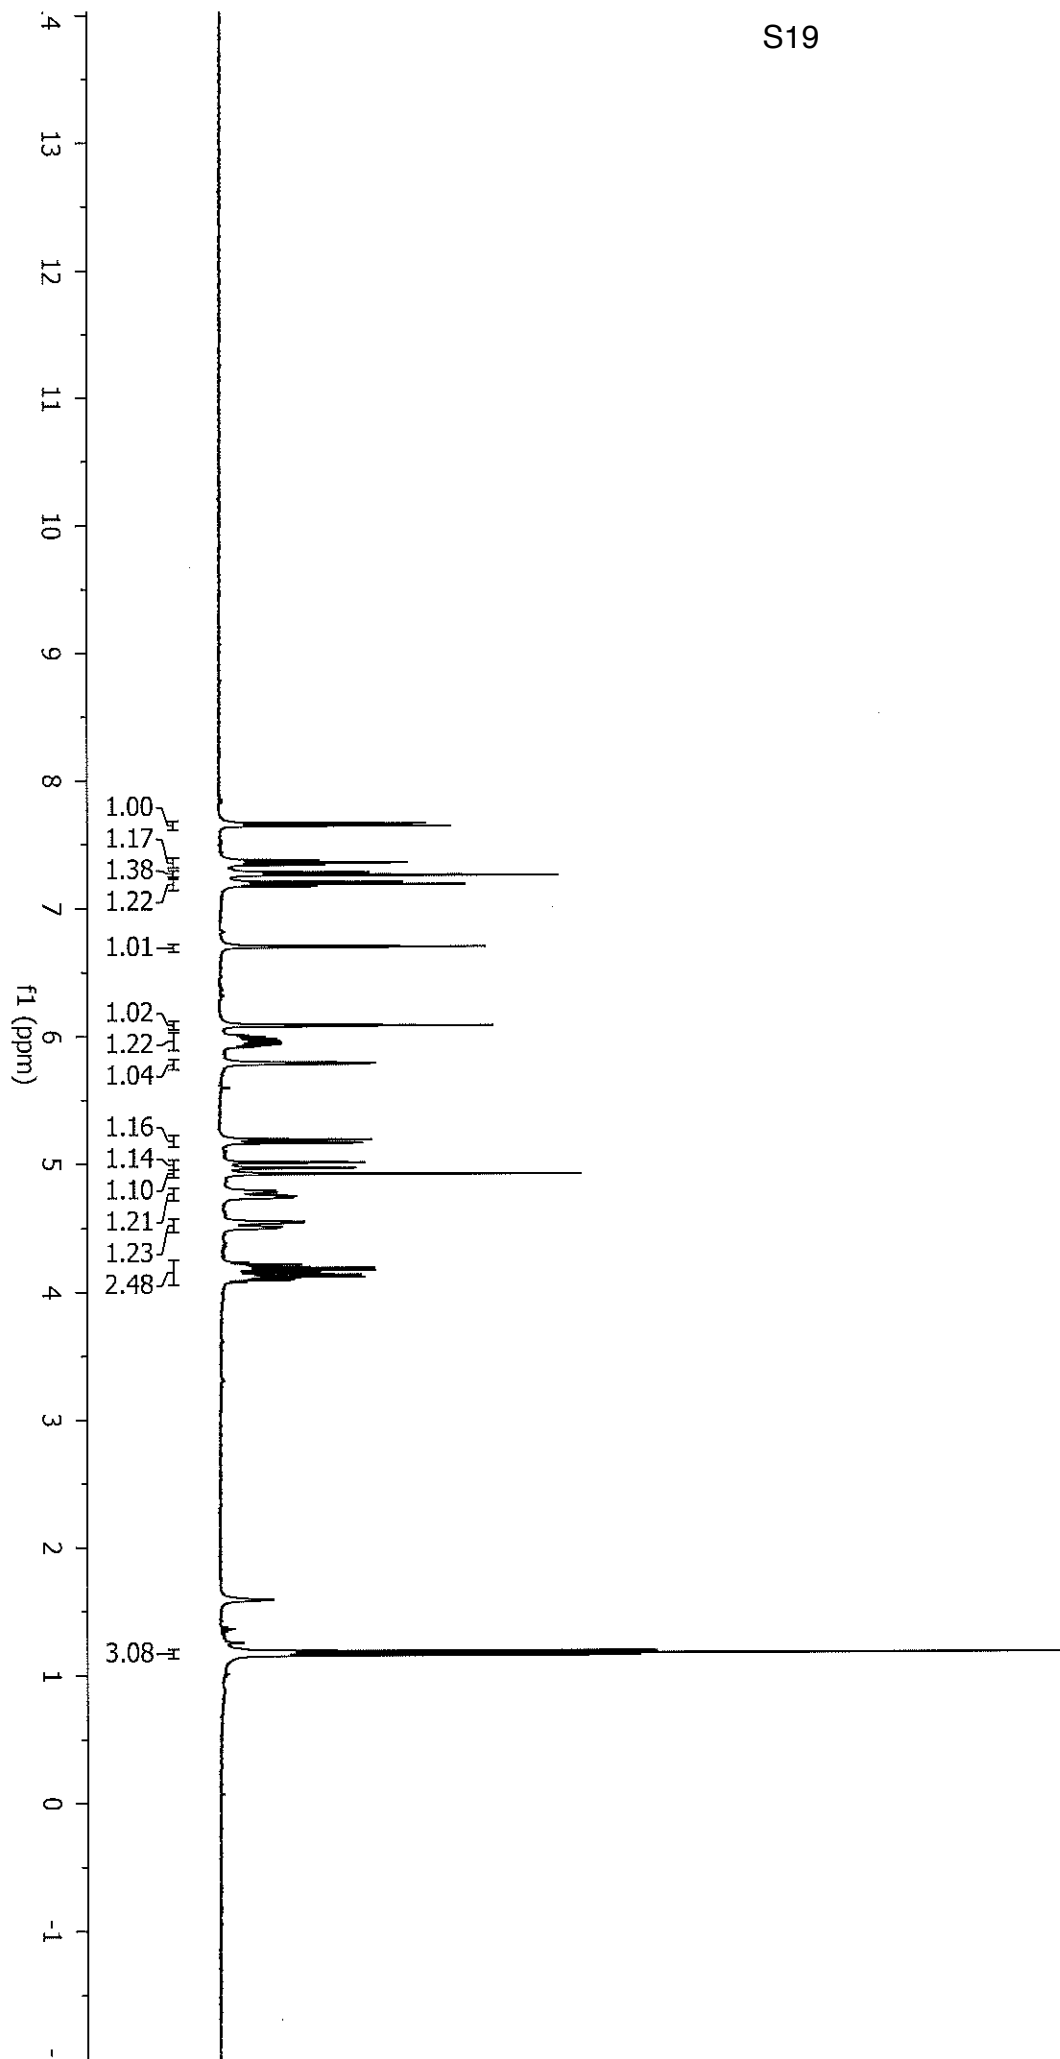

S20

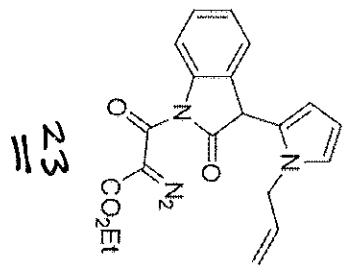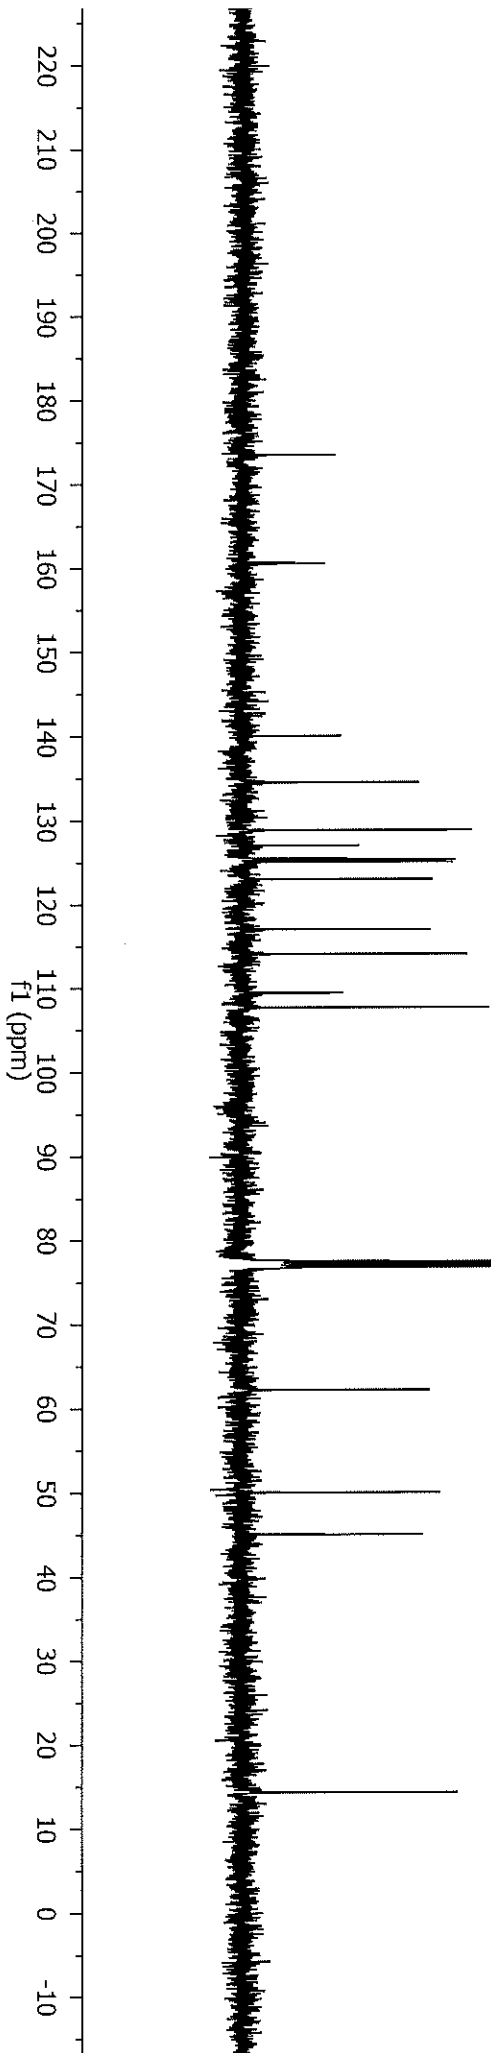

S21

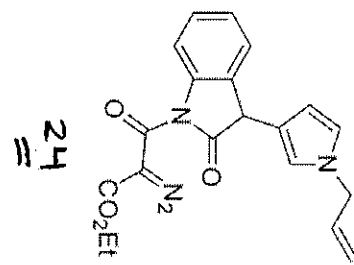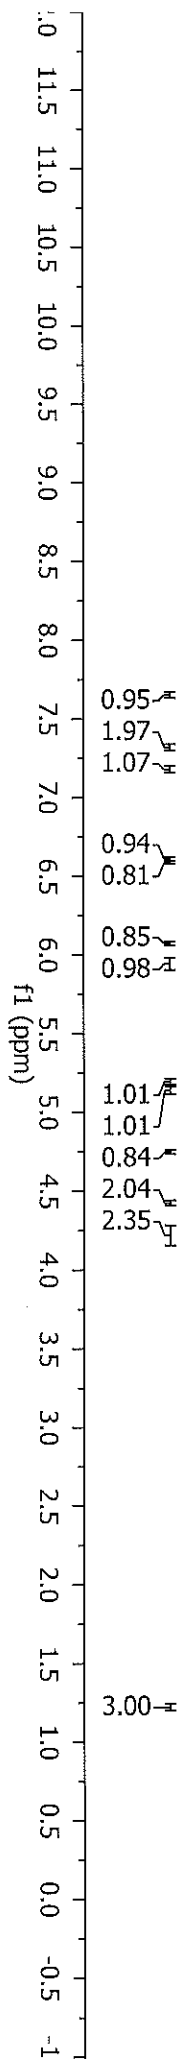

S22

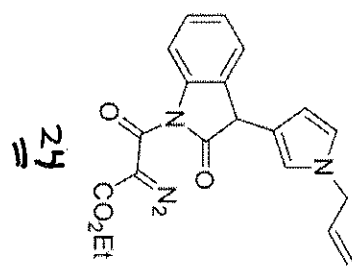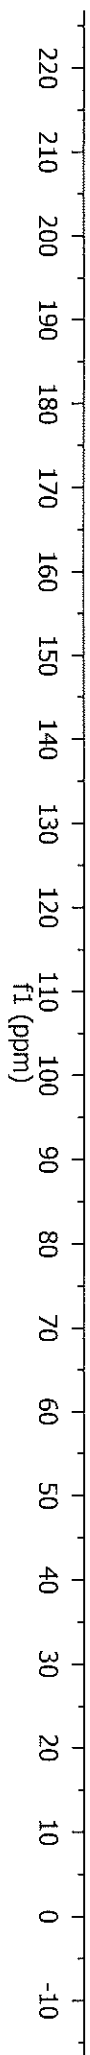

S23

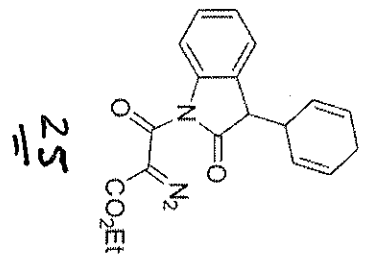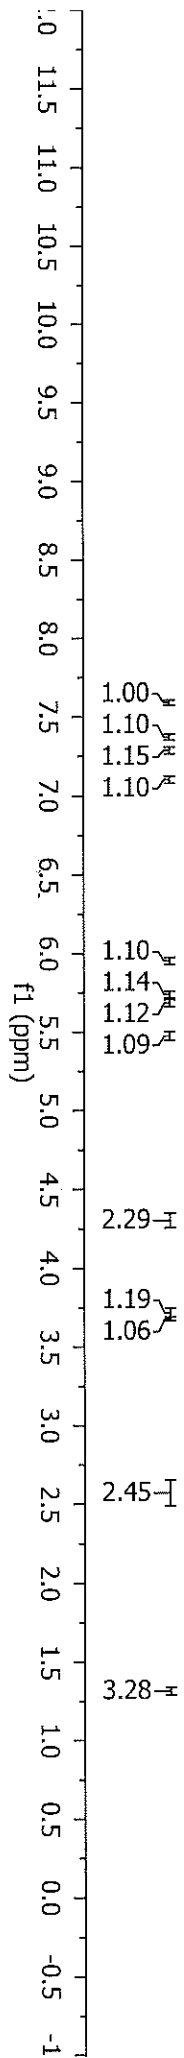

S24

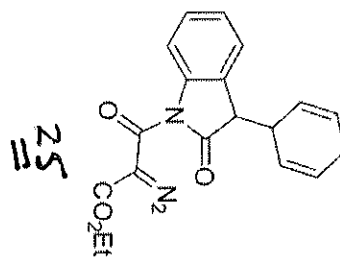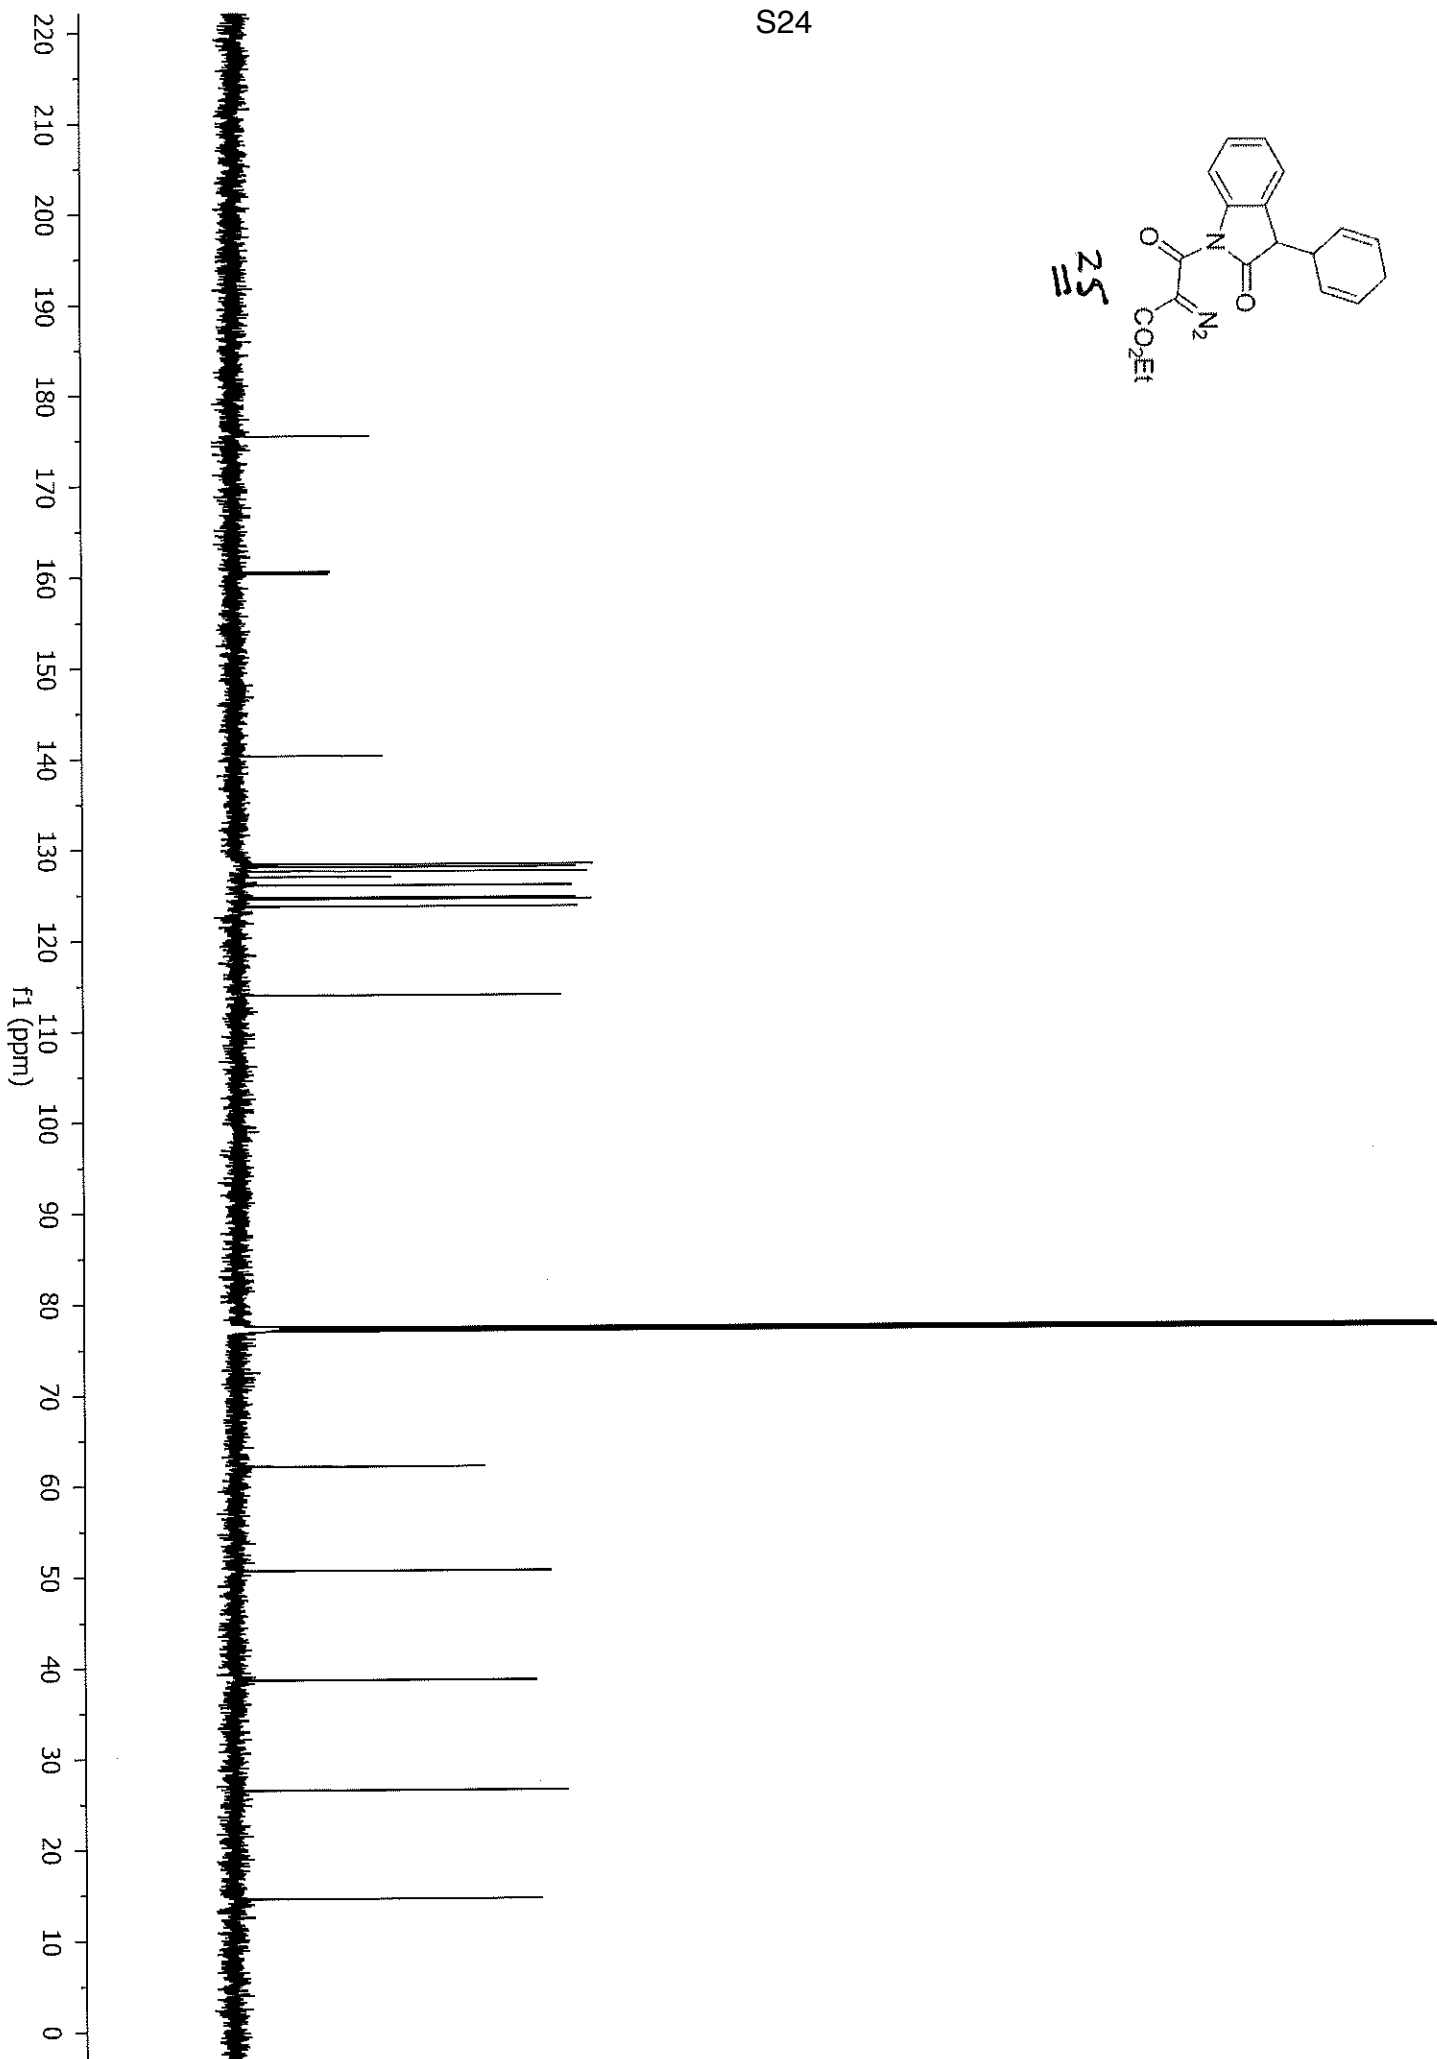



S25

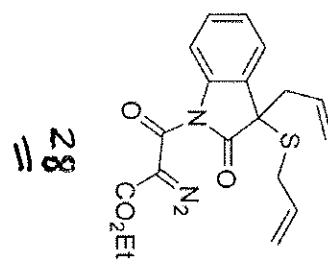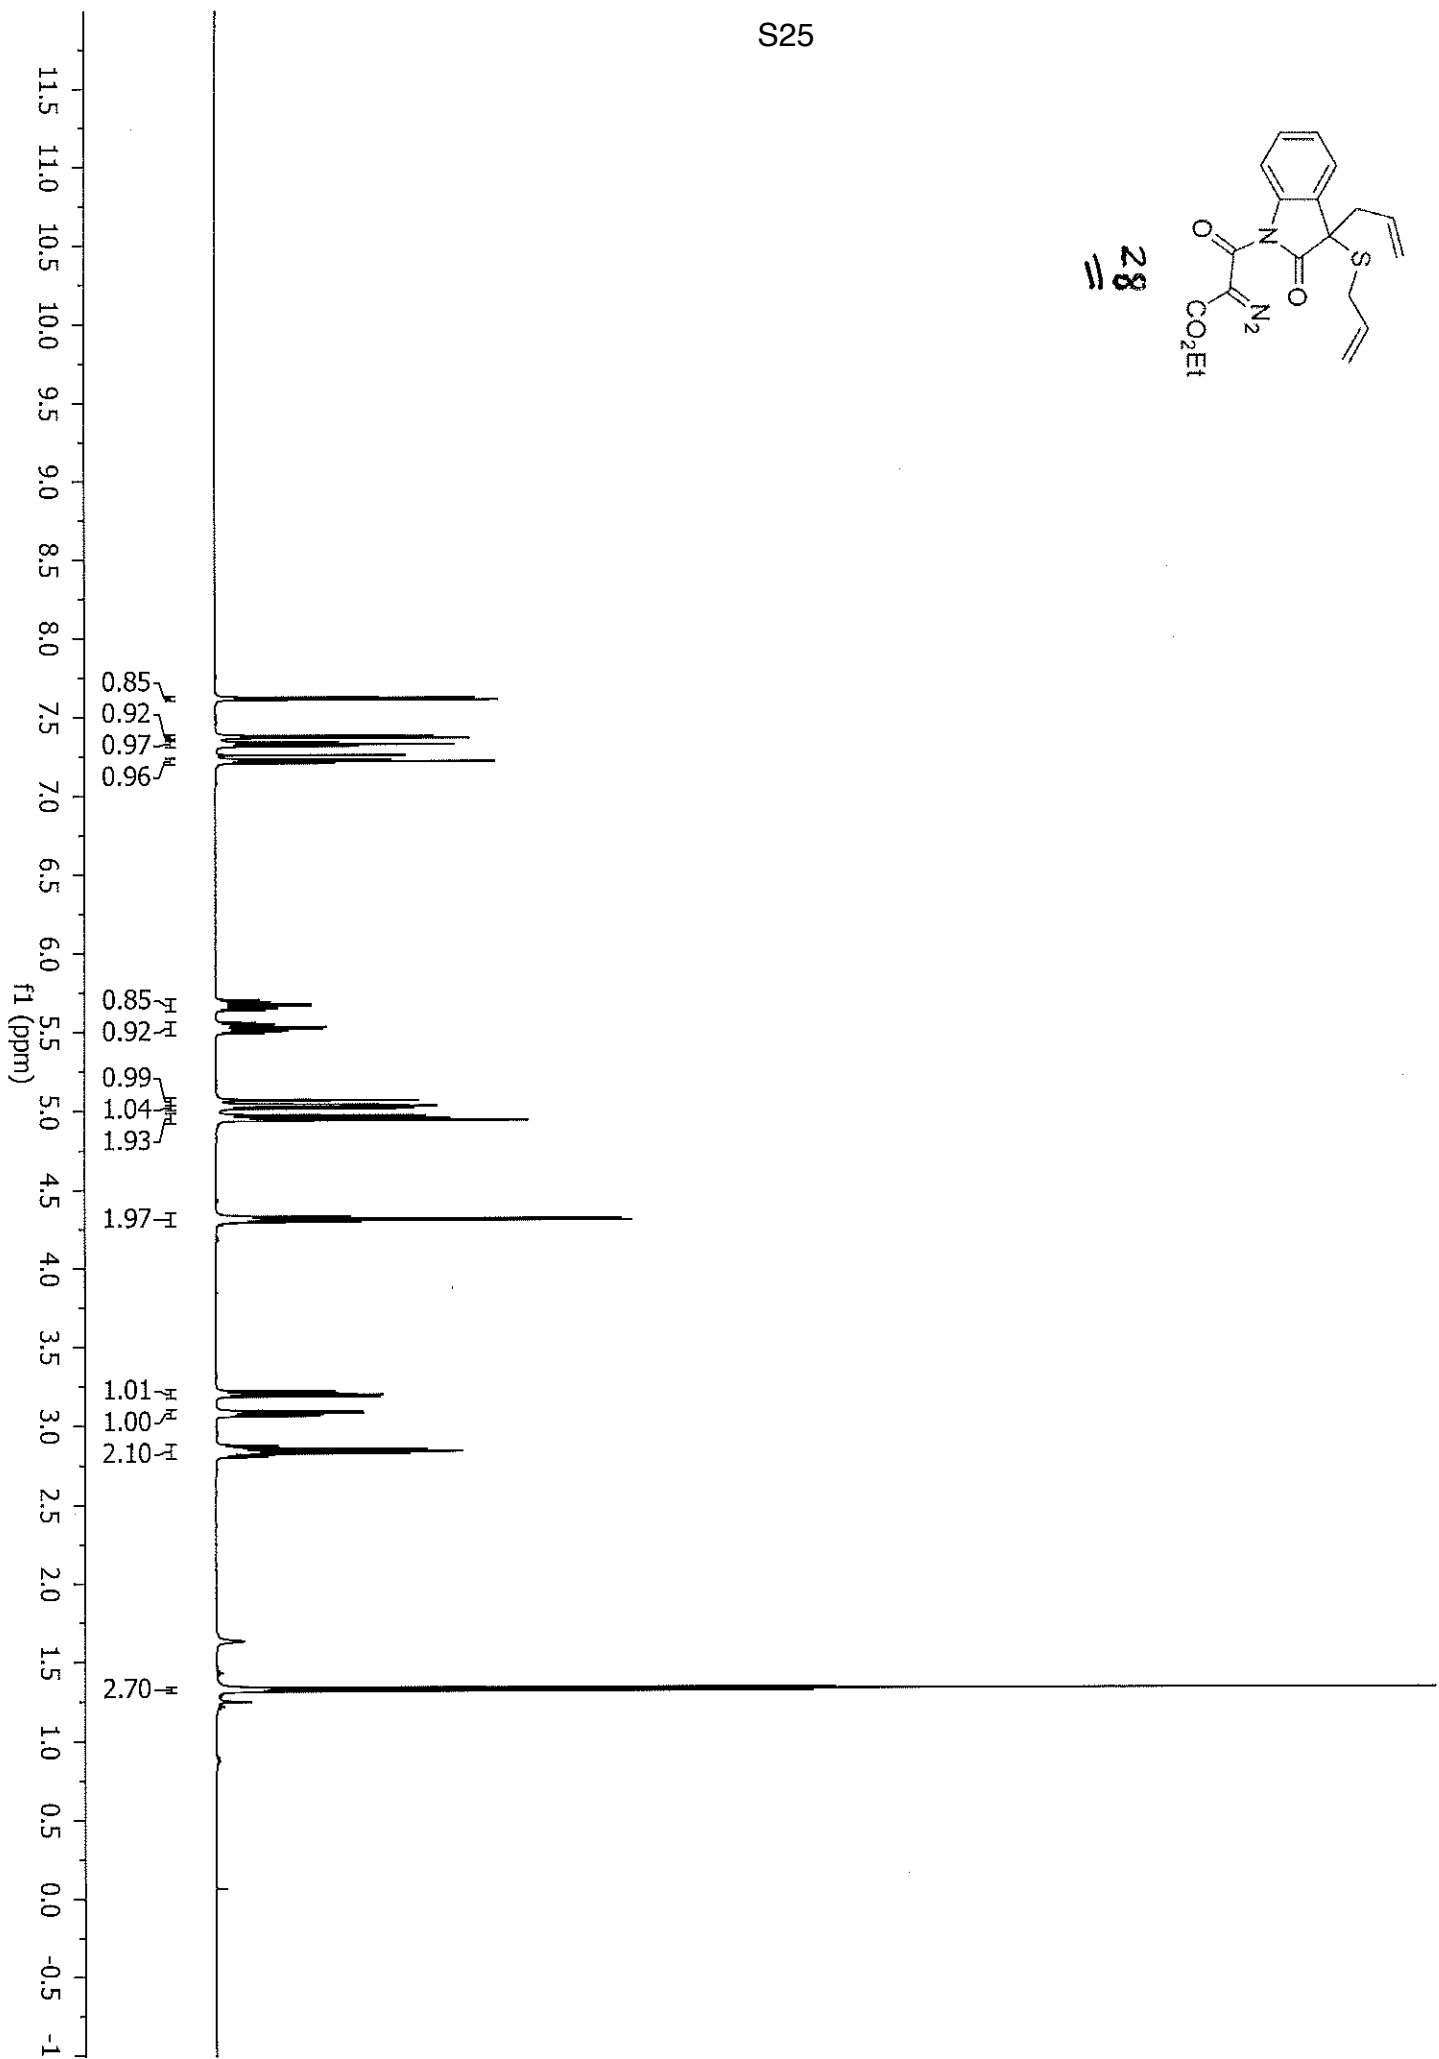

S26

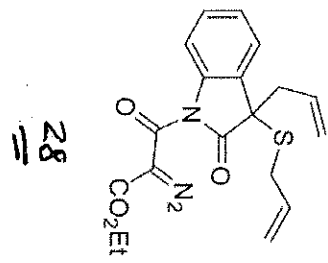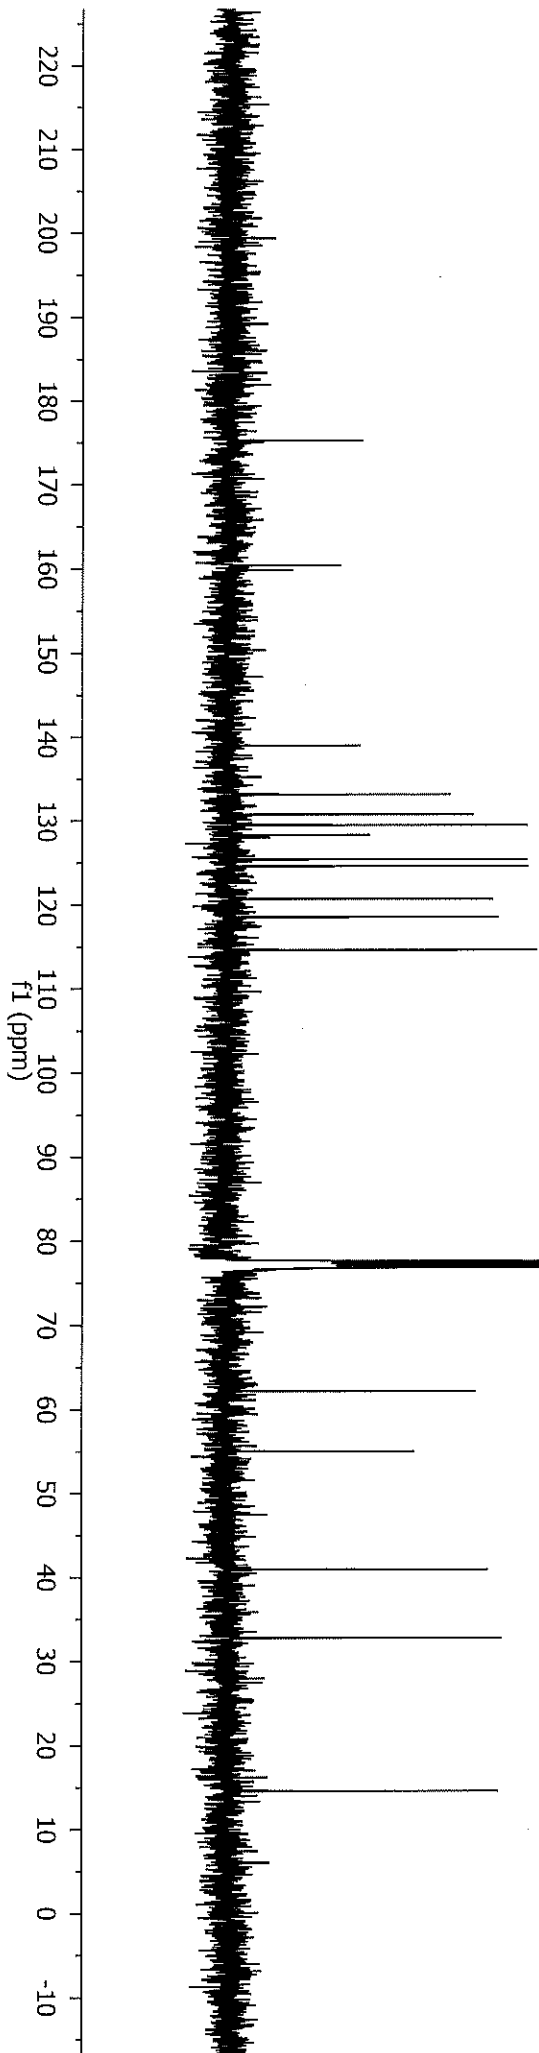

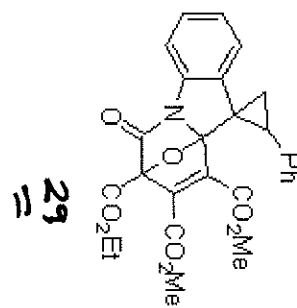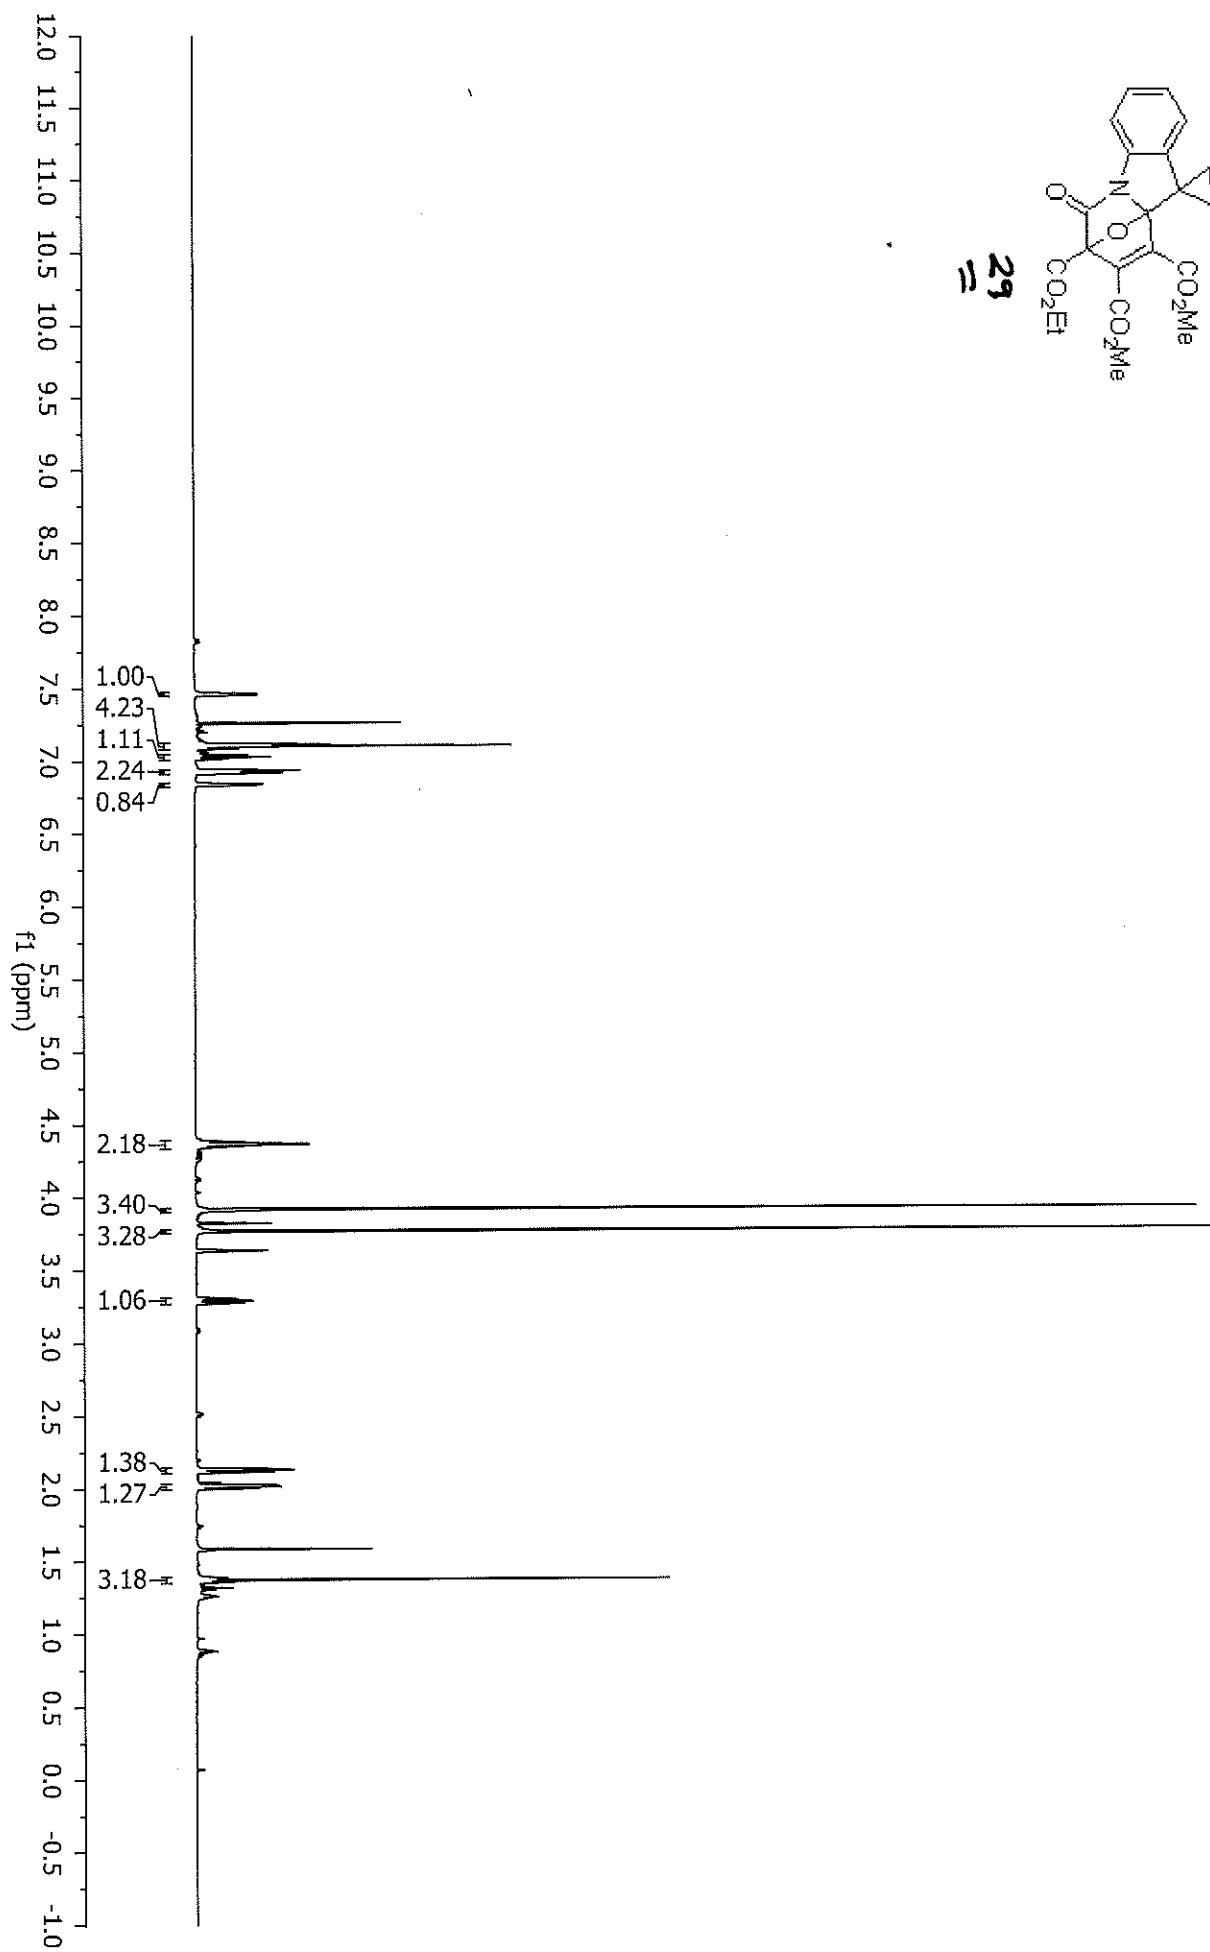

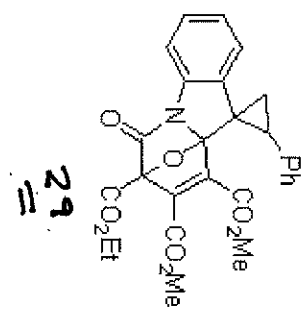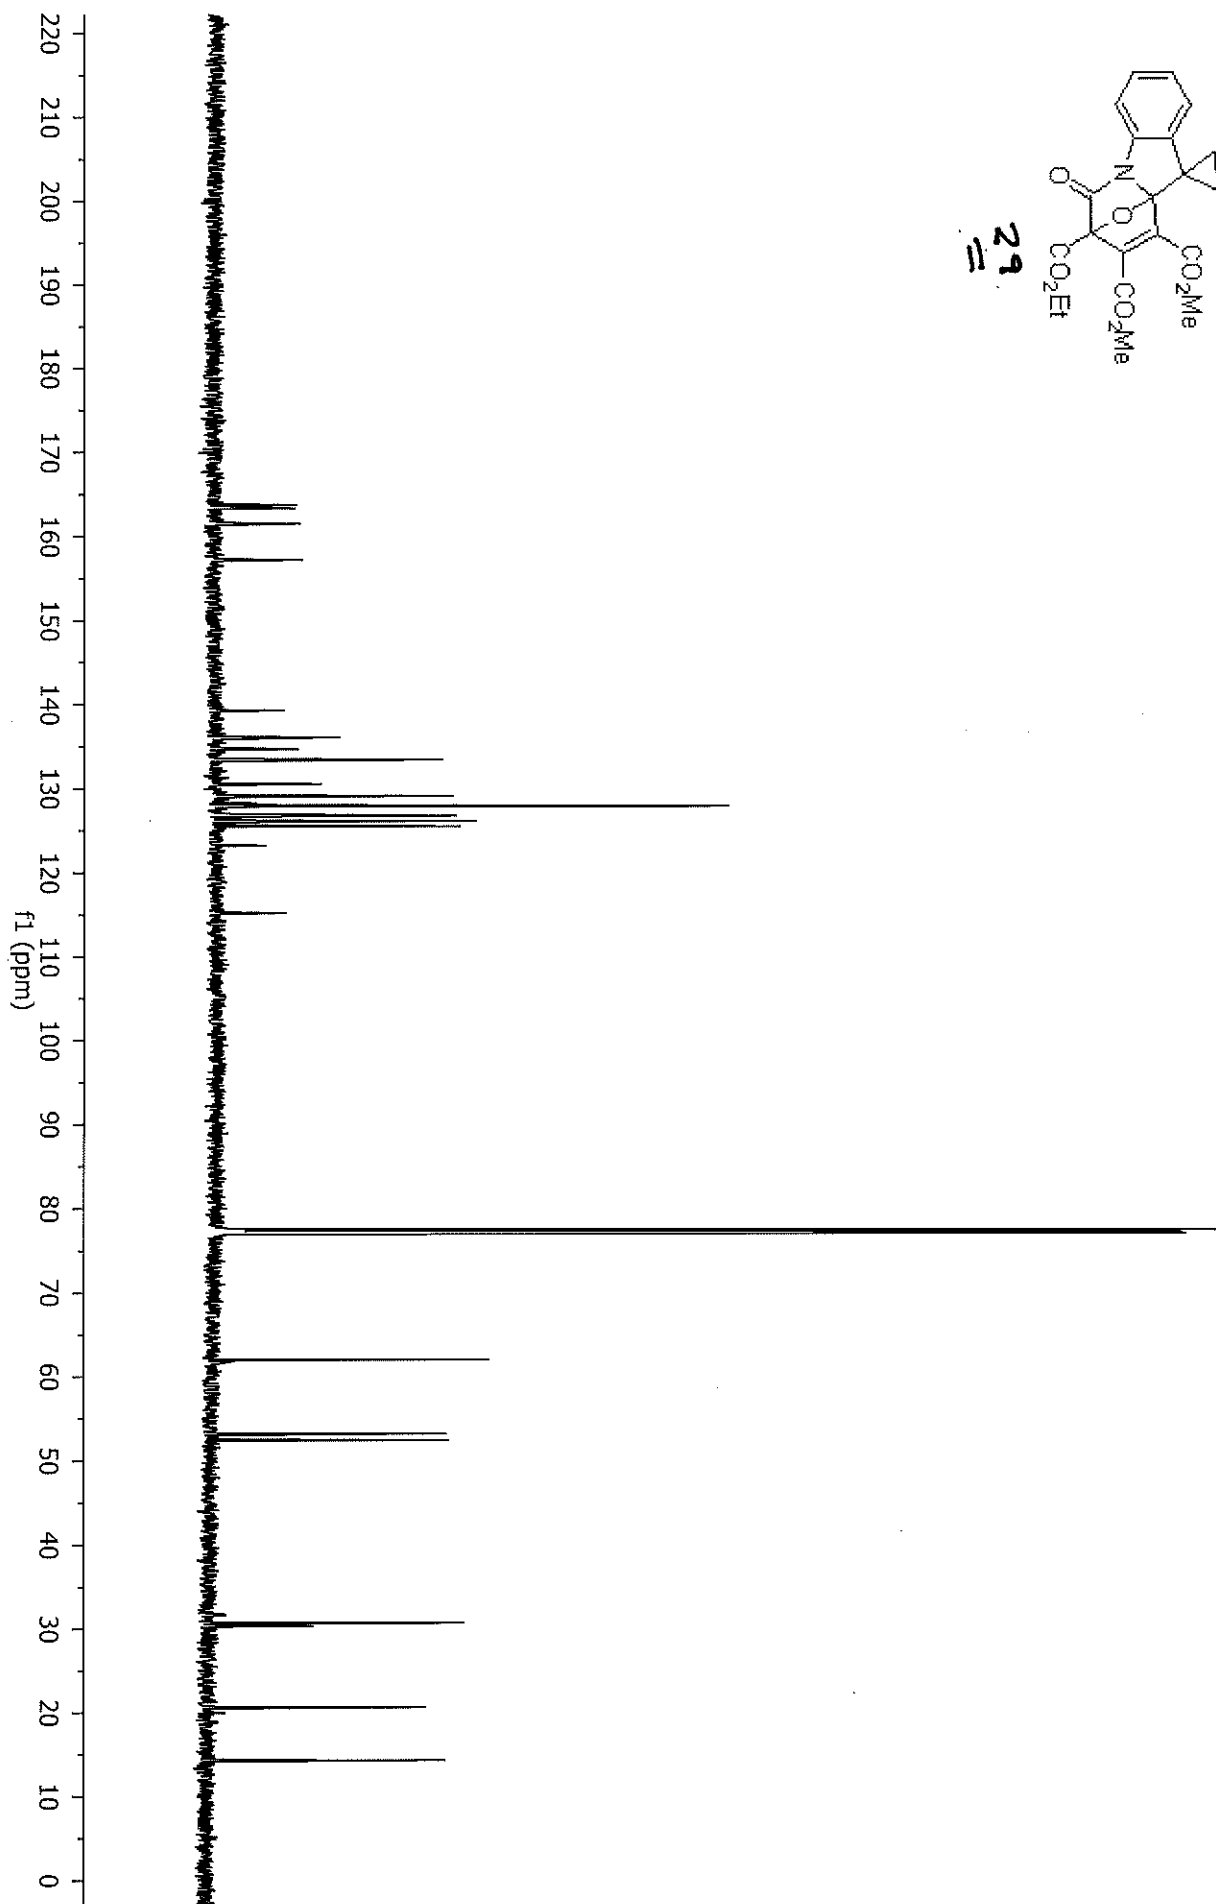

S29

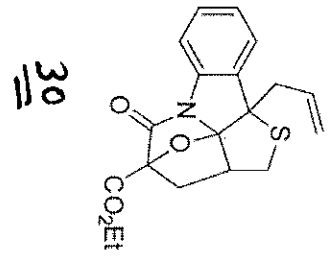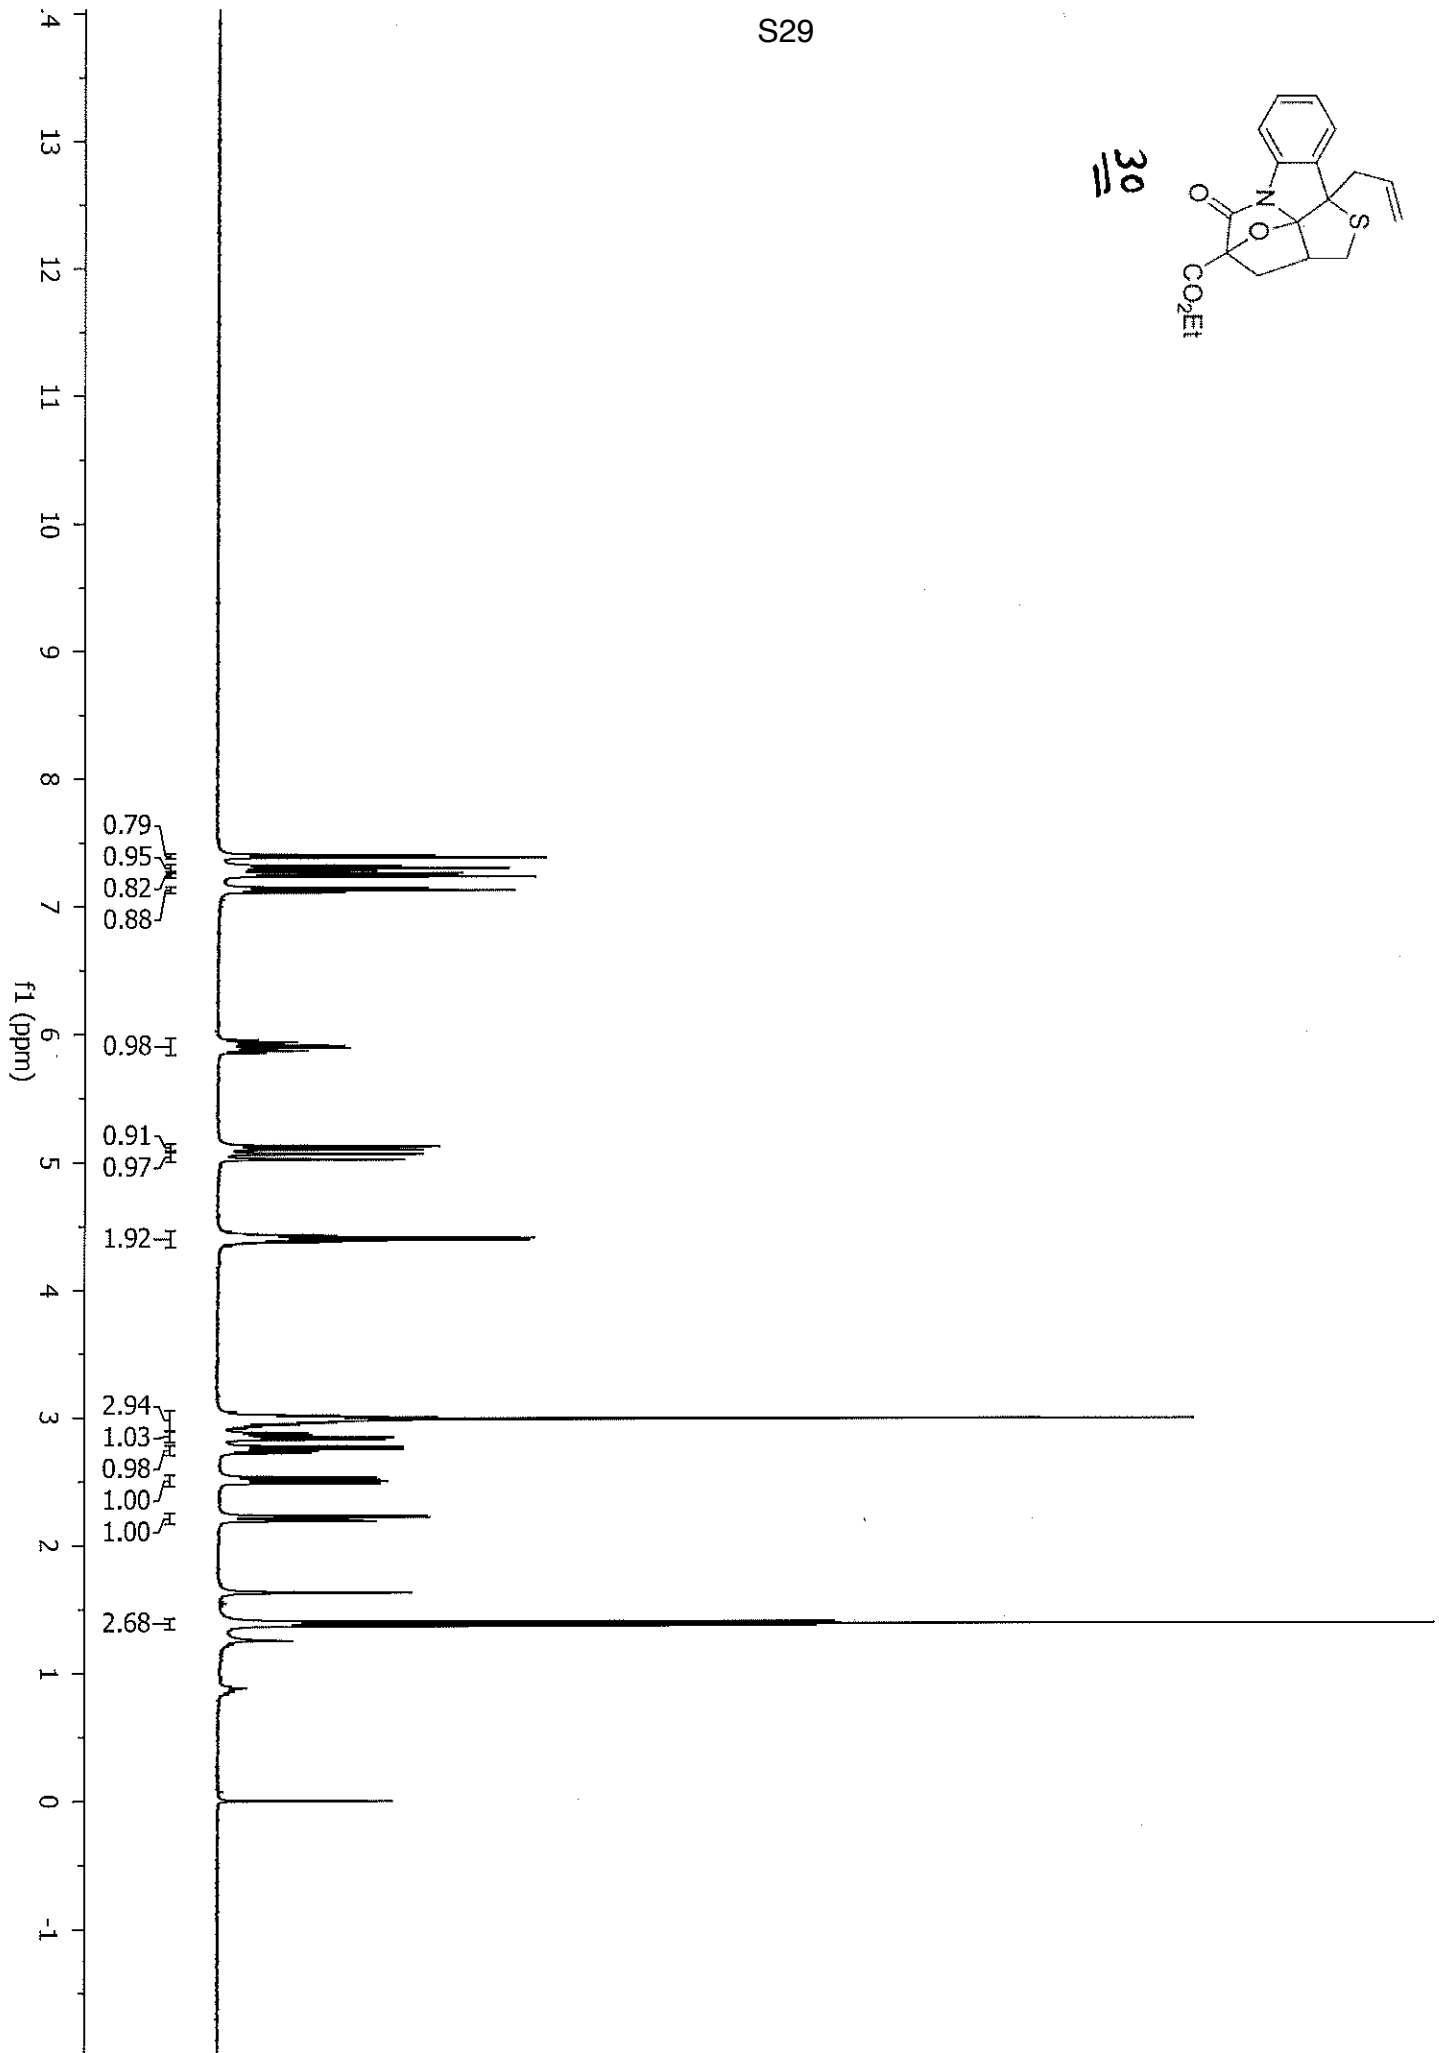

S30

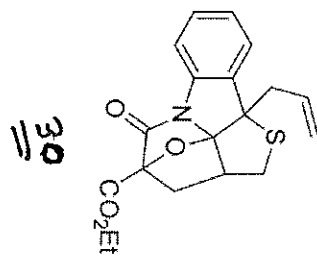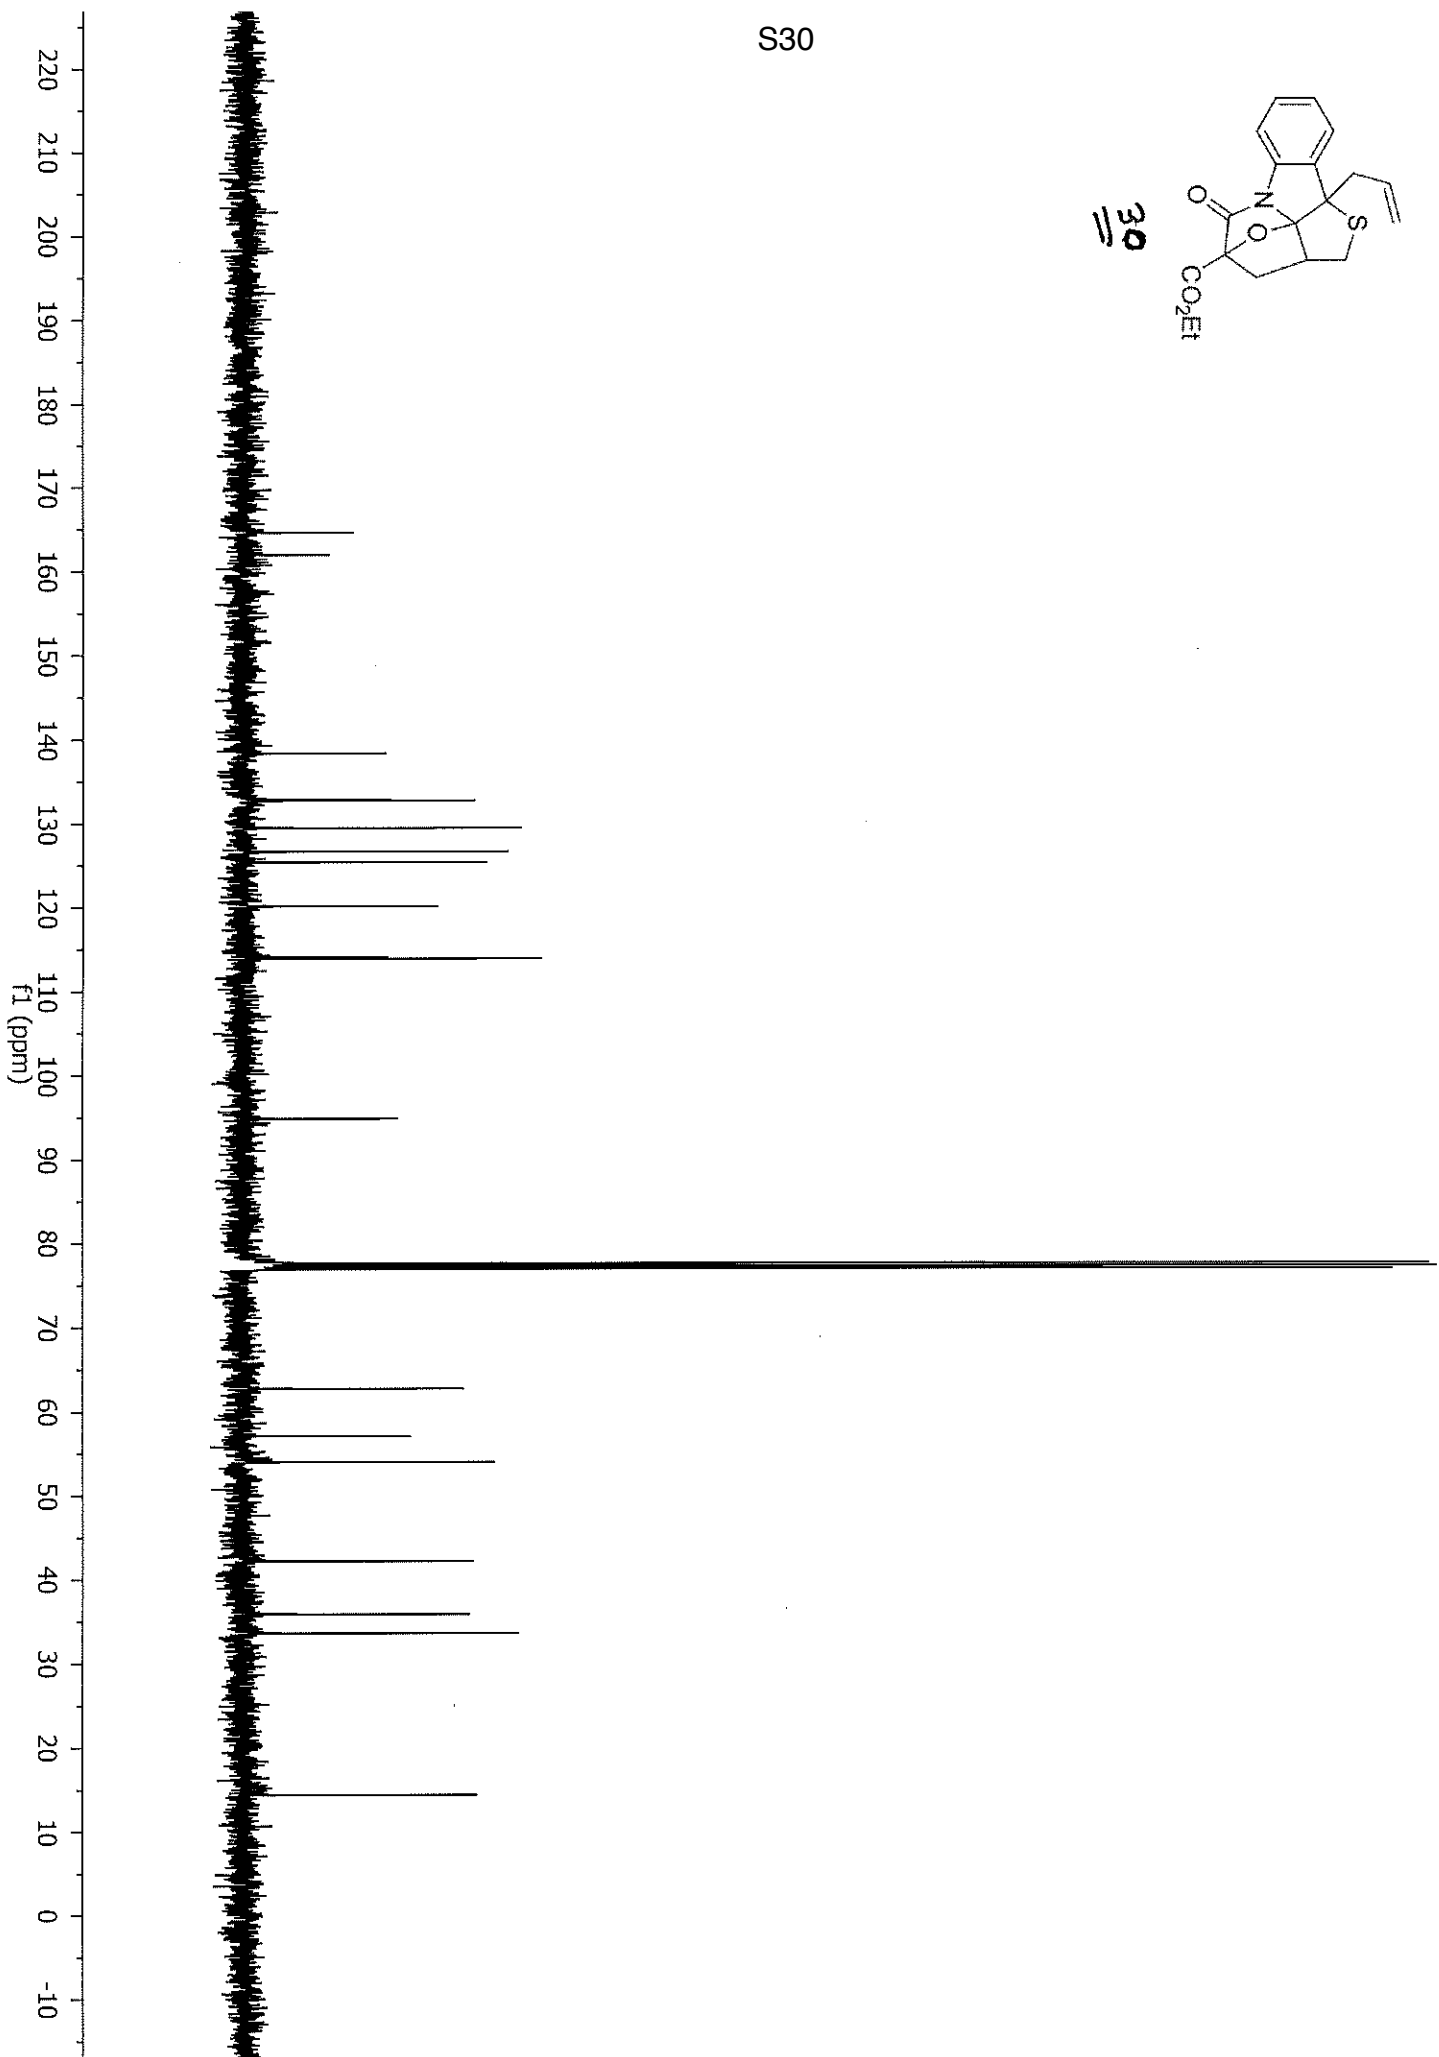

S31

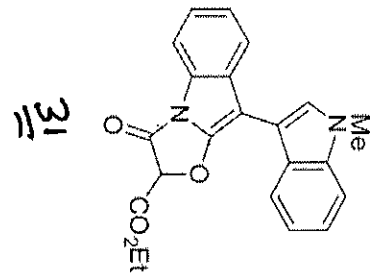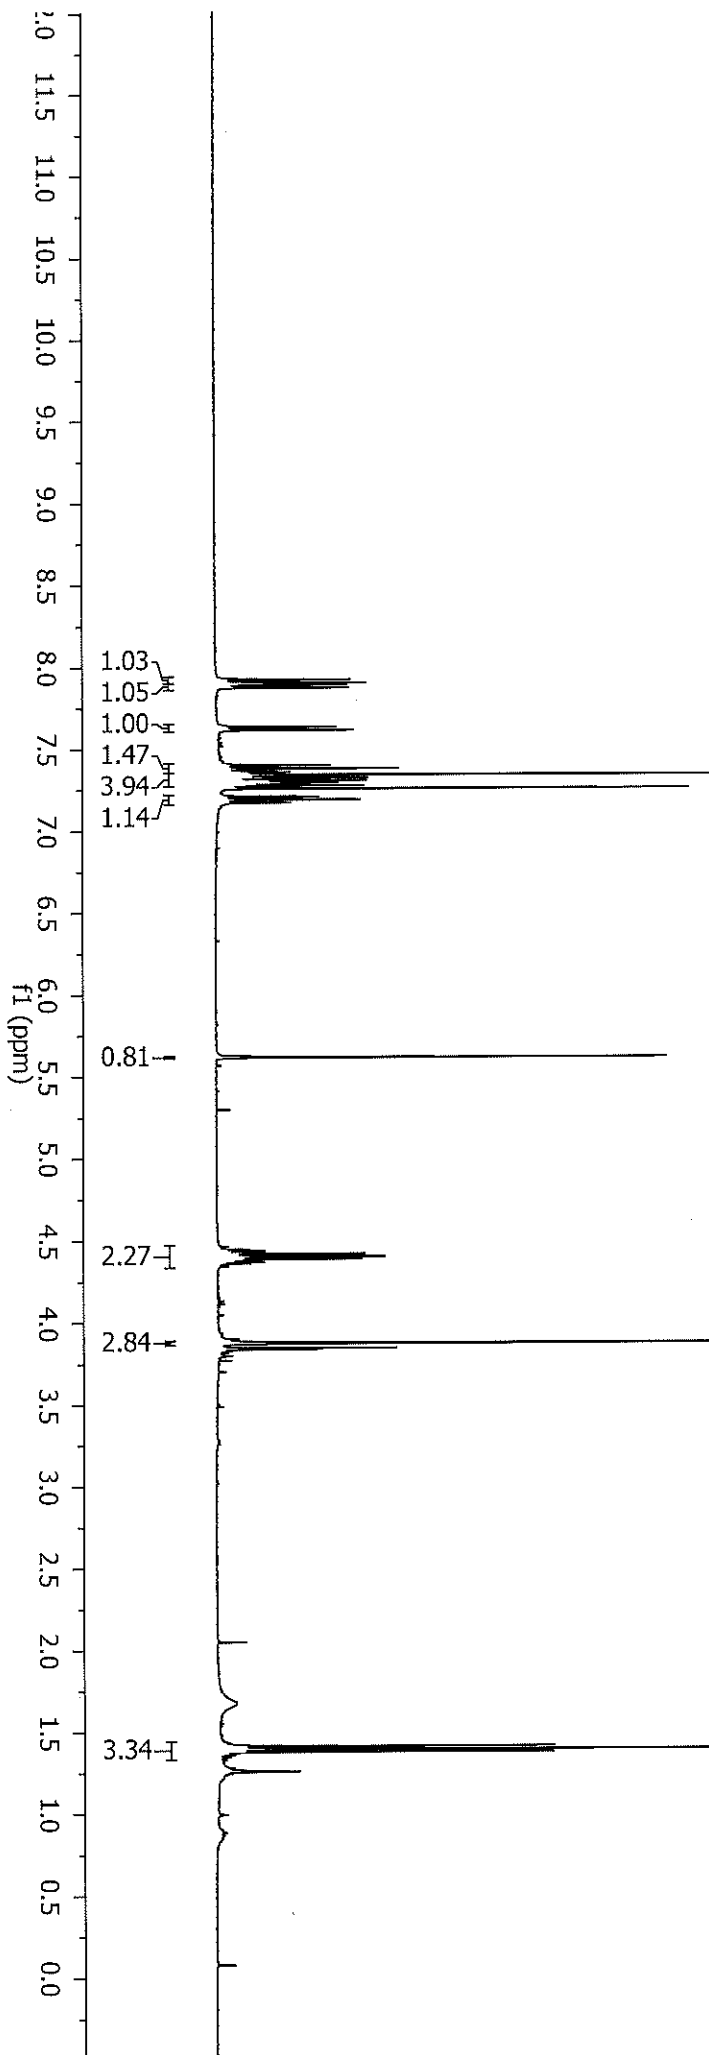

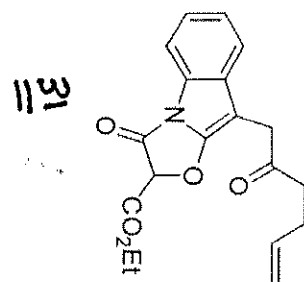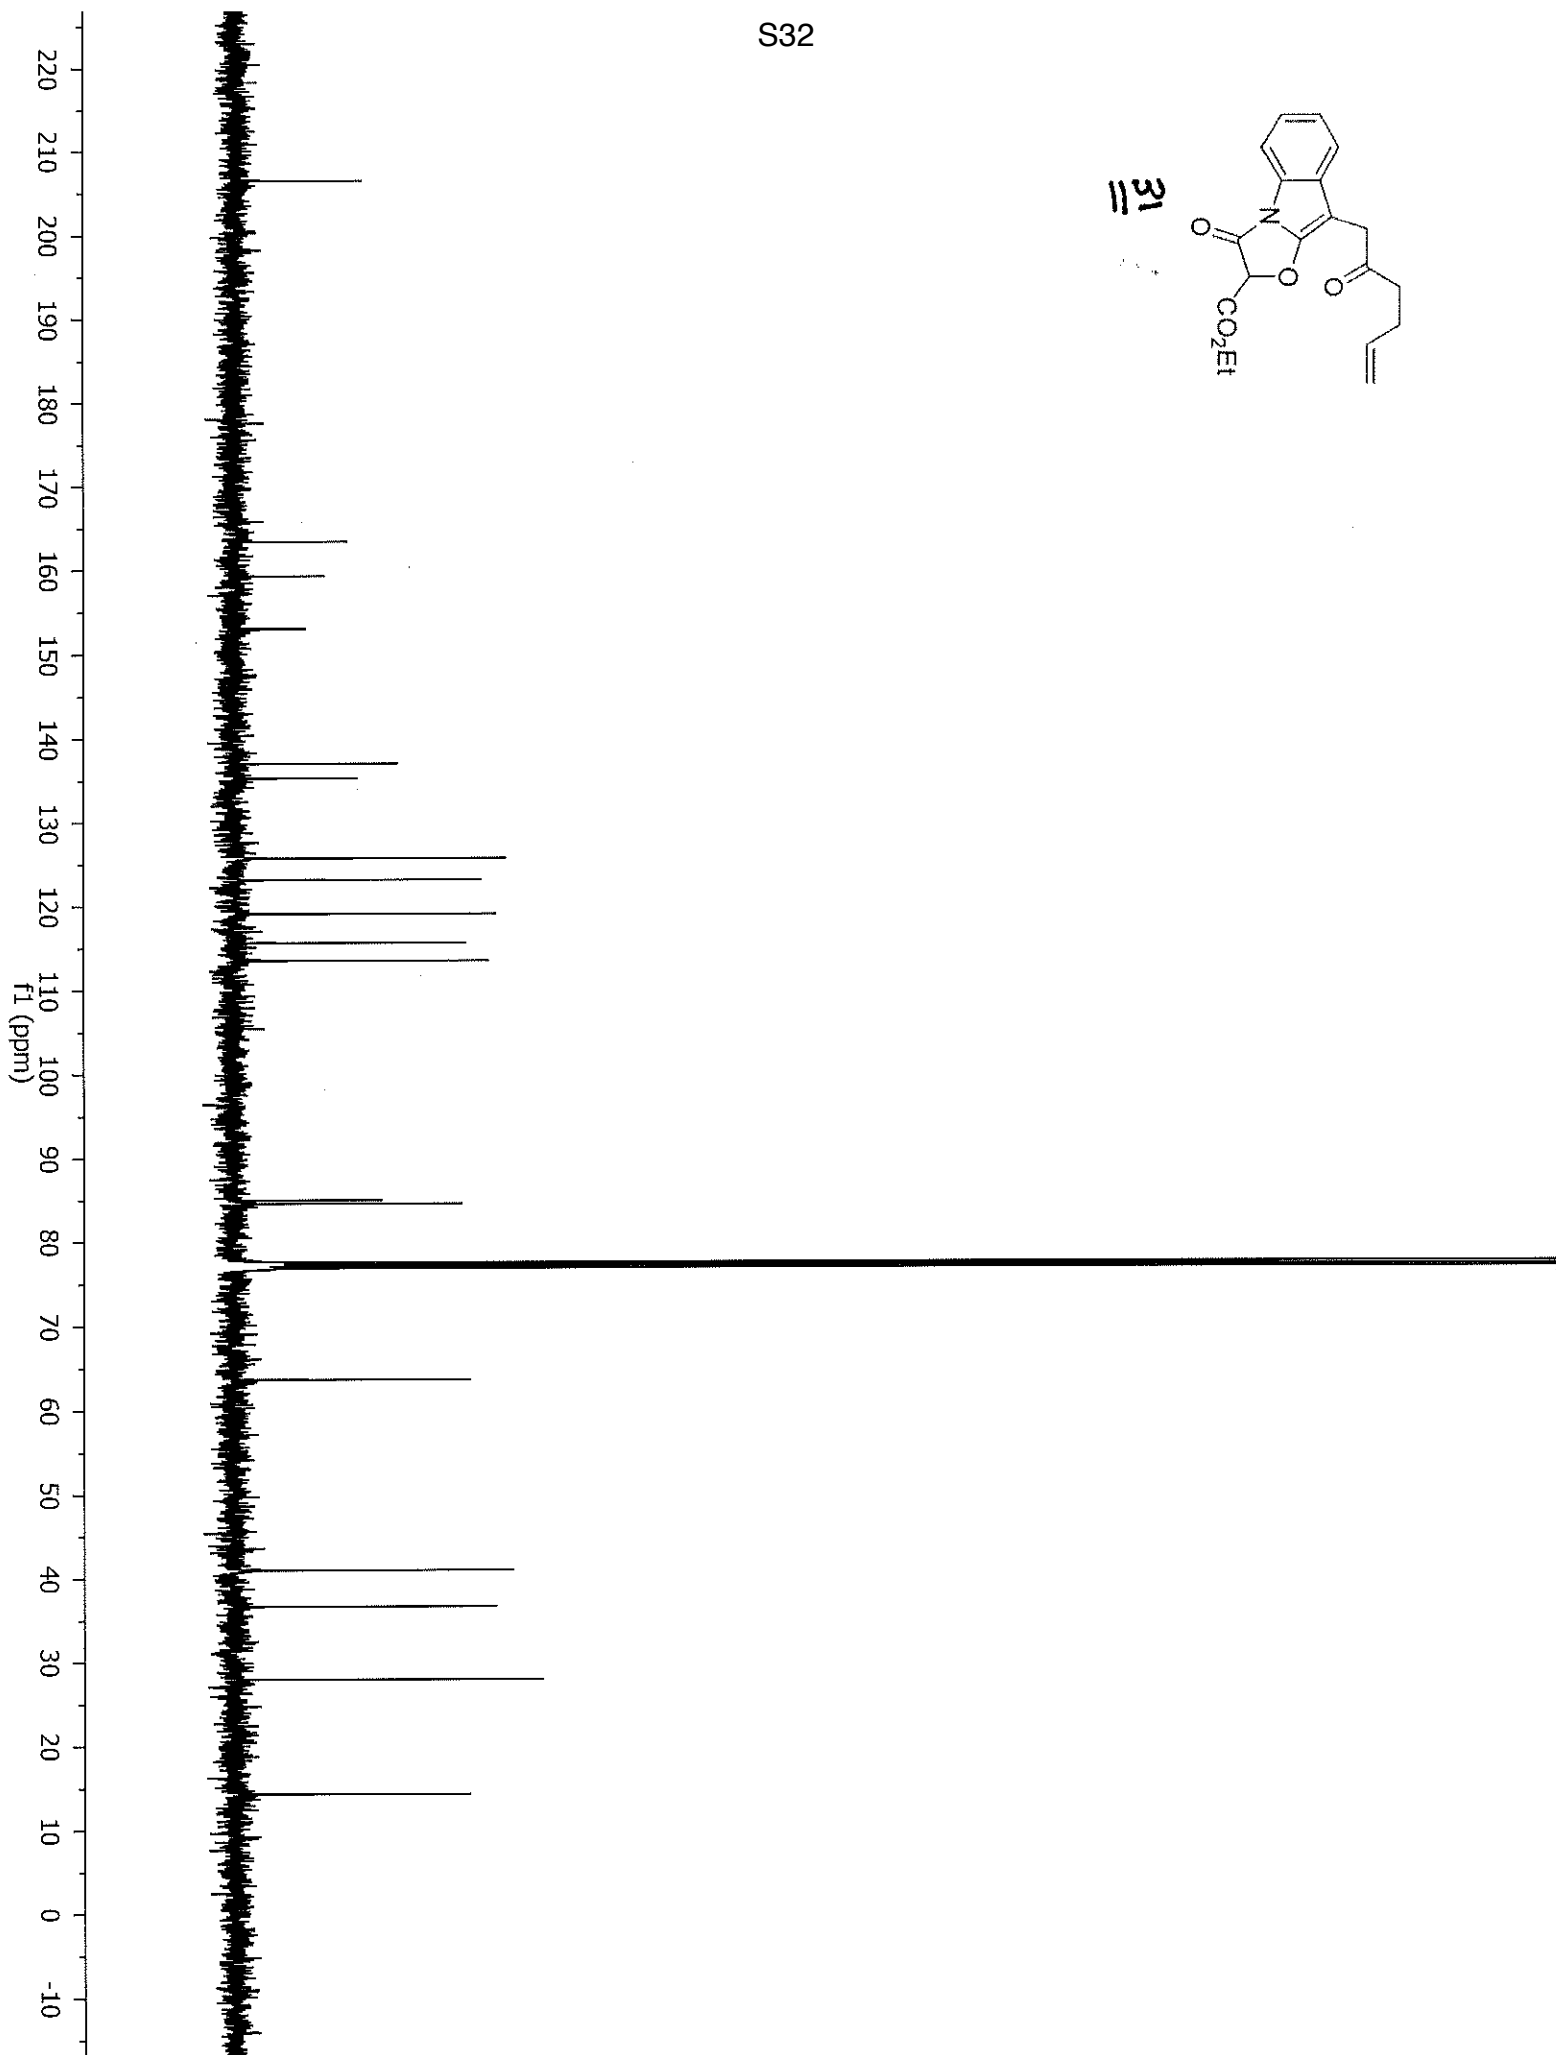



S33

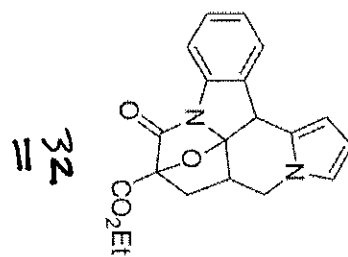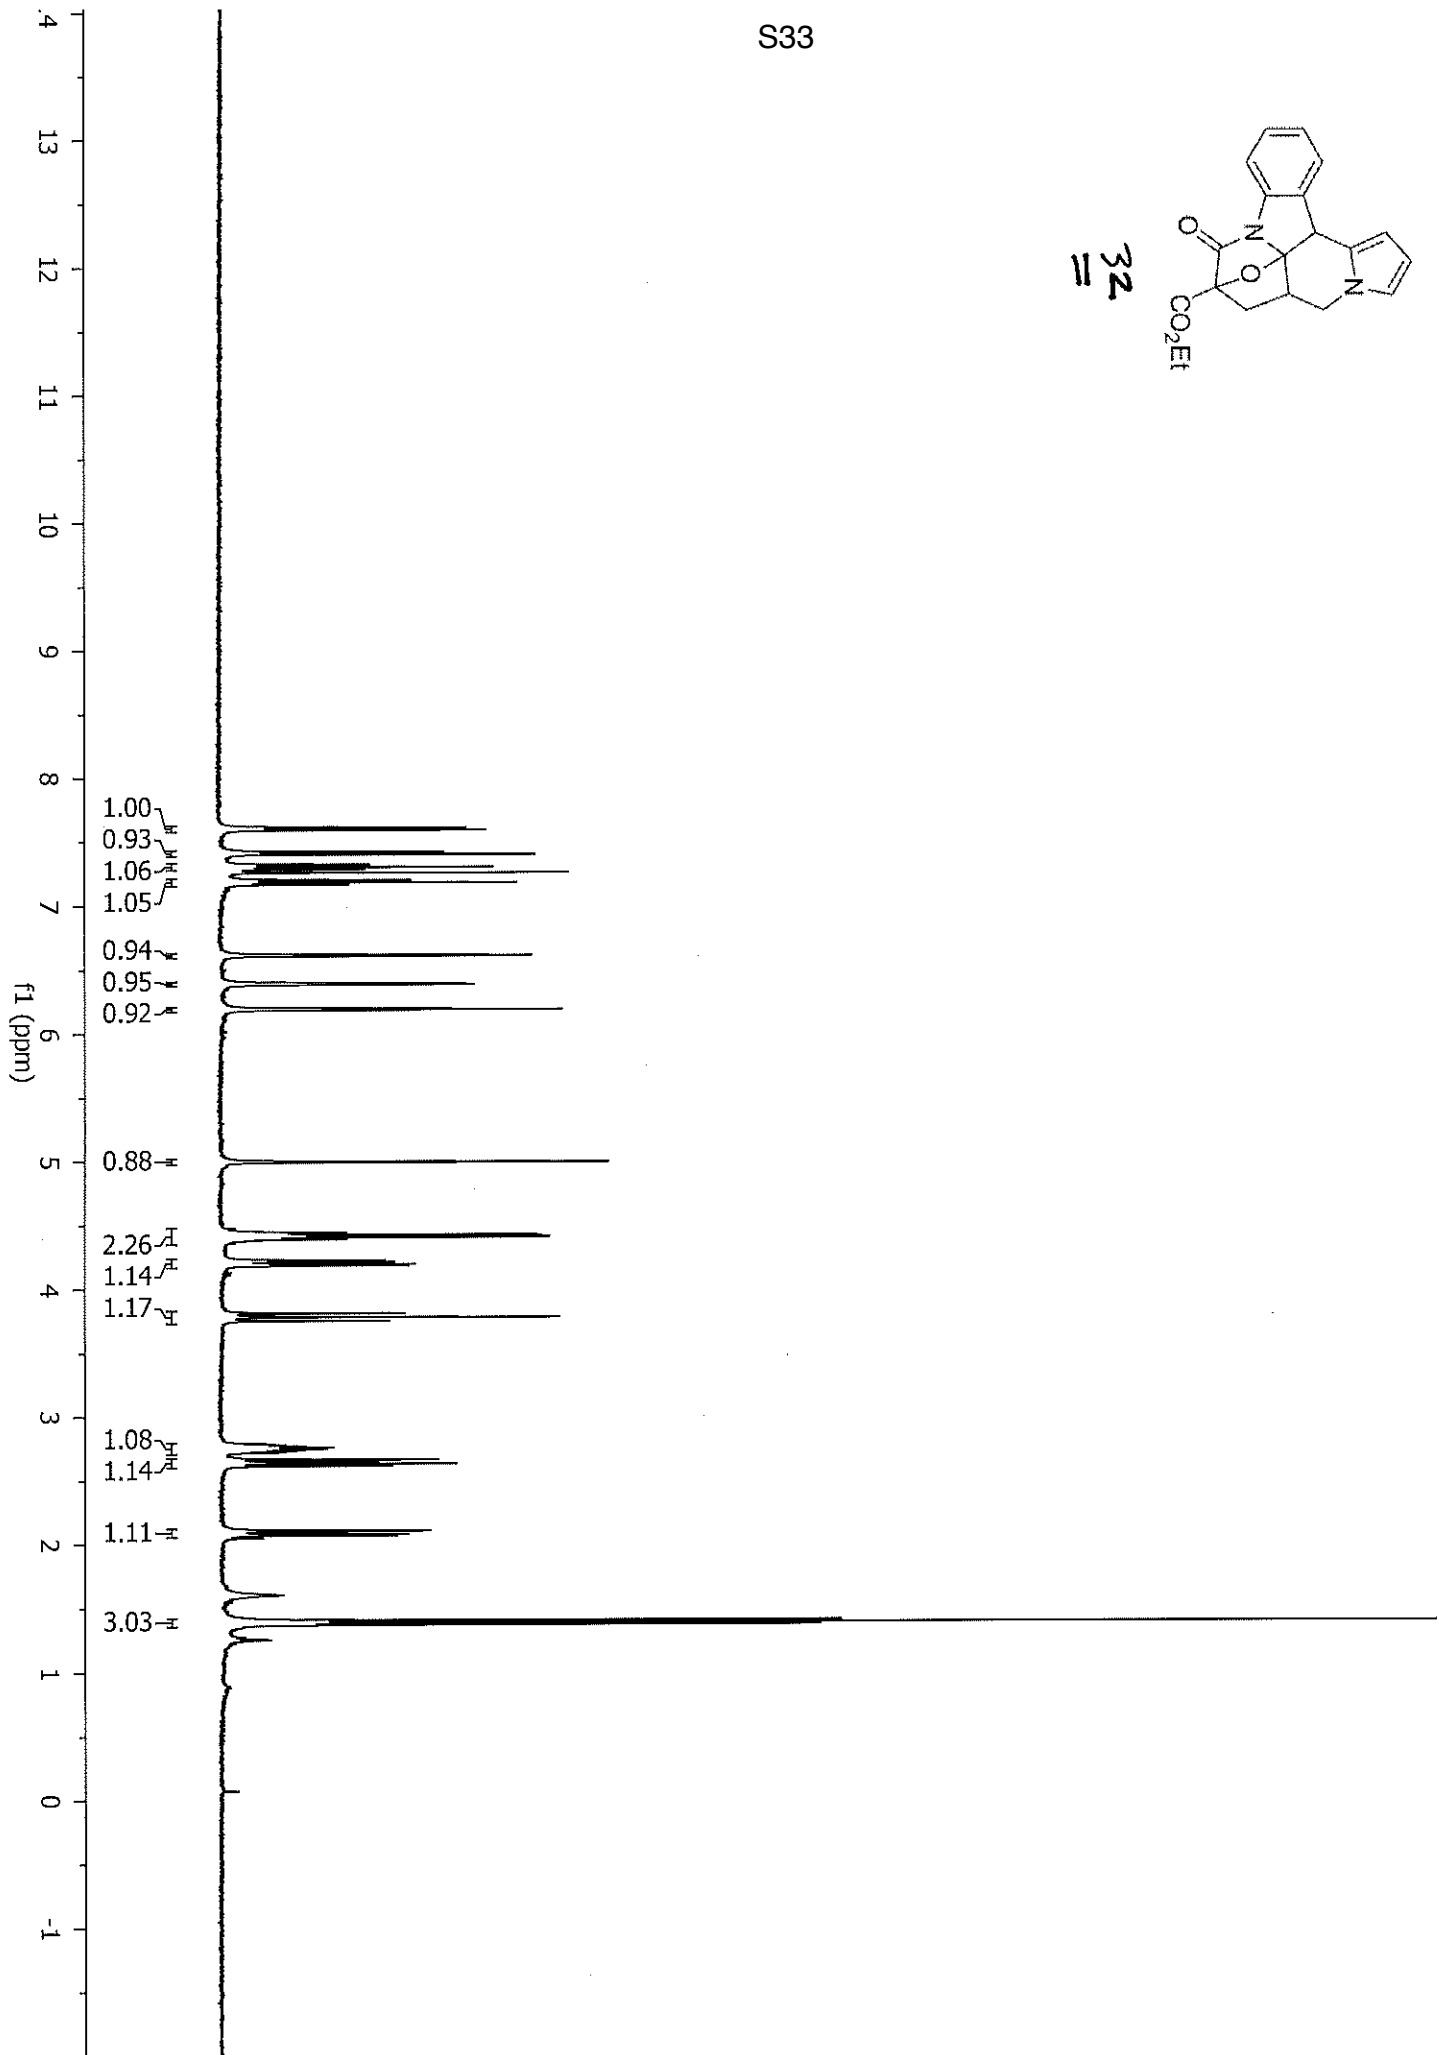

S34

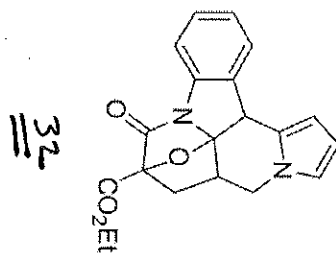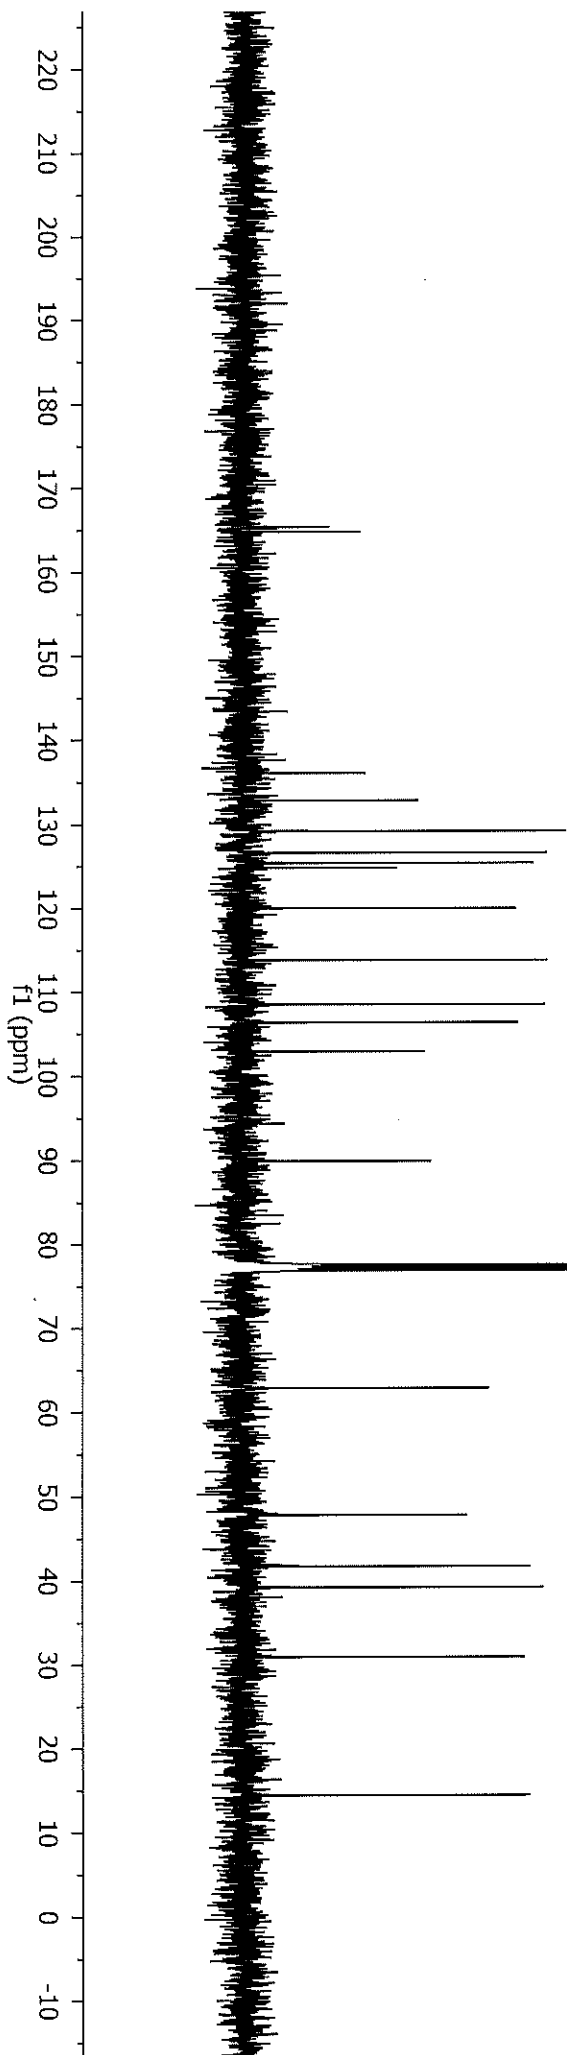

S35

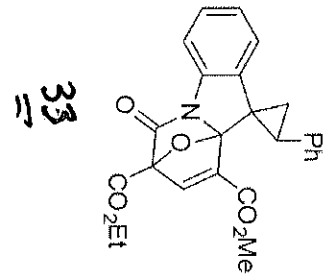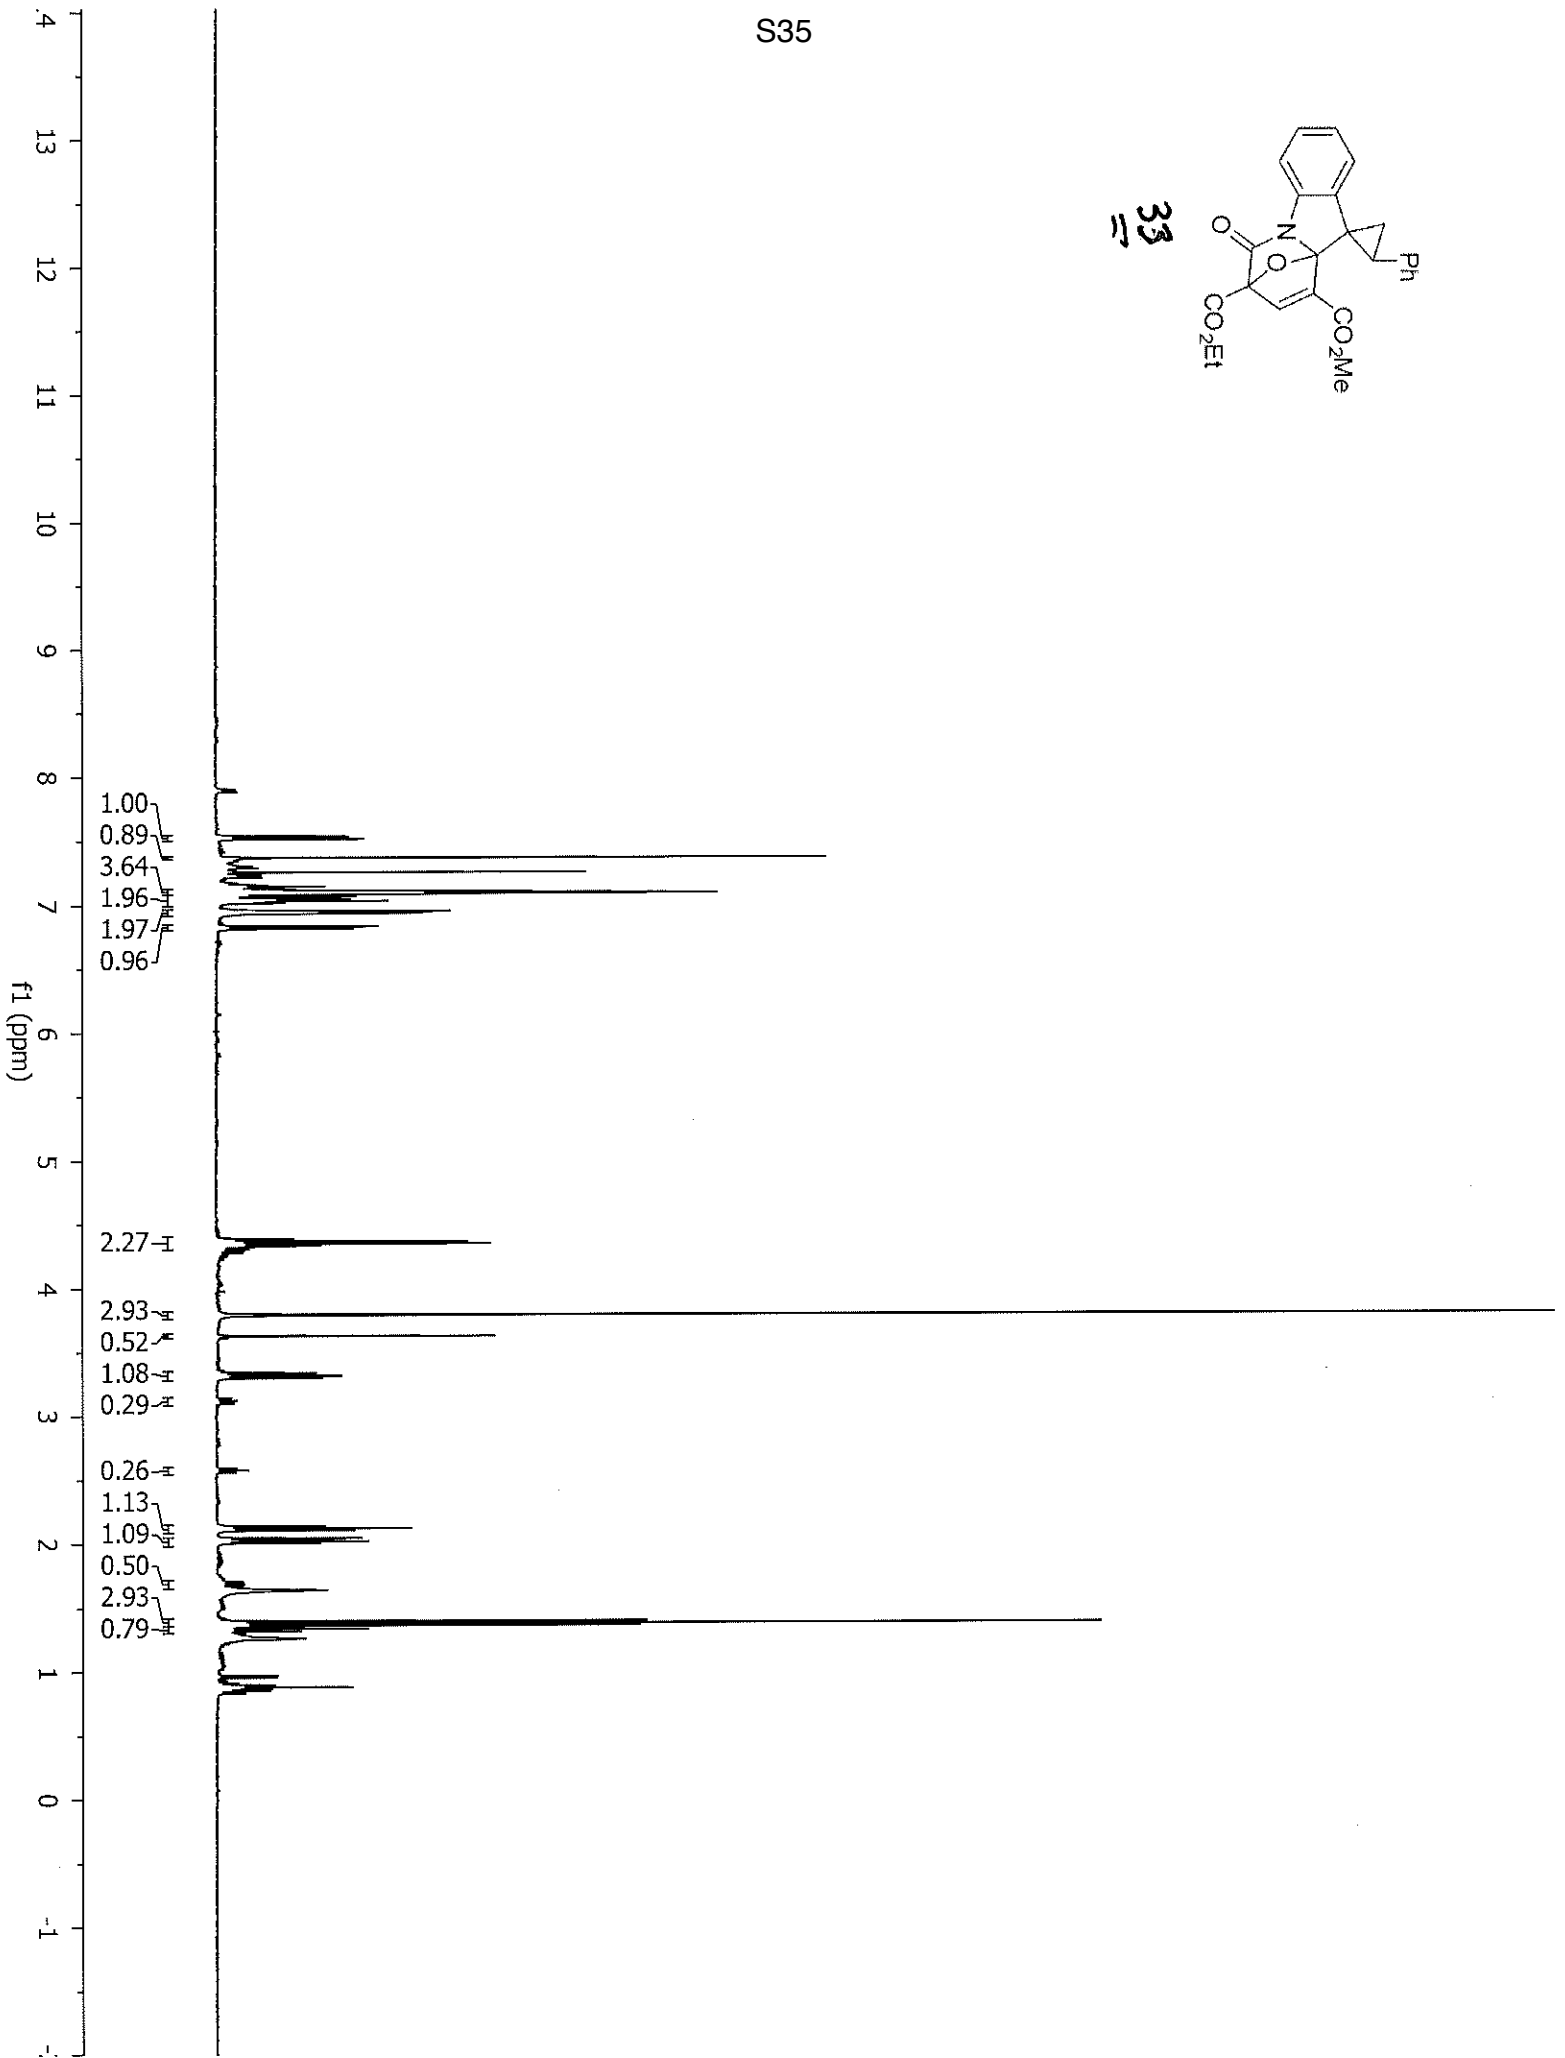

S36

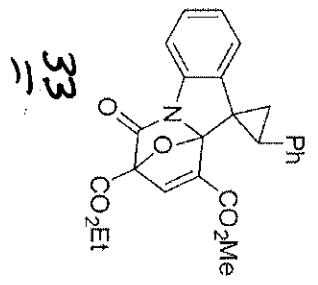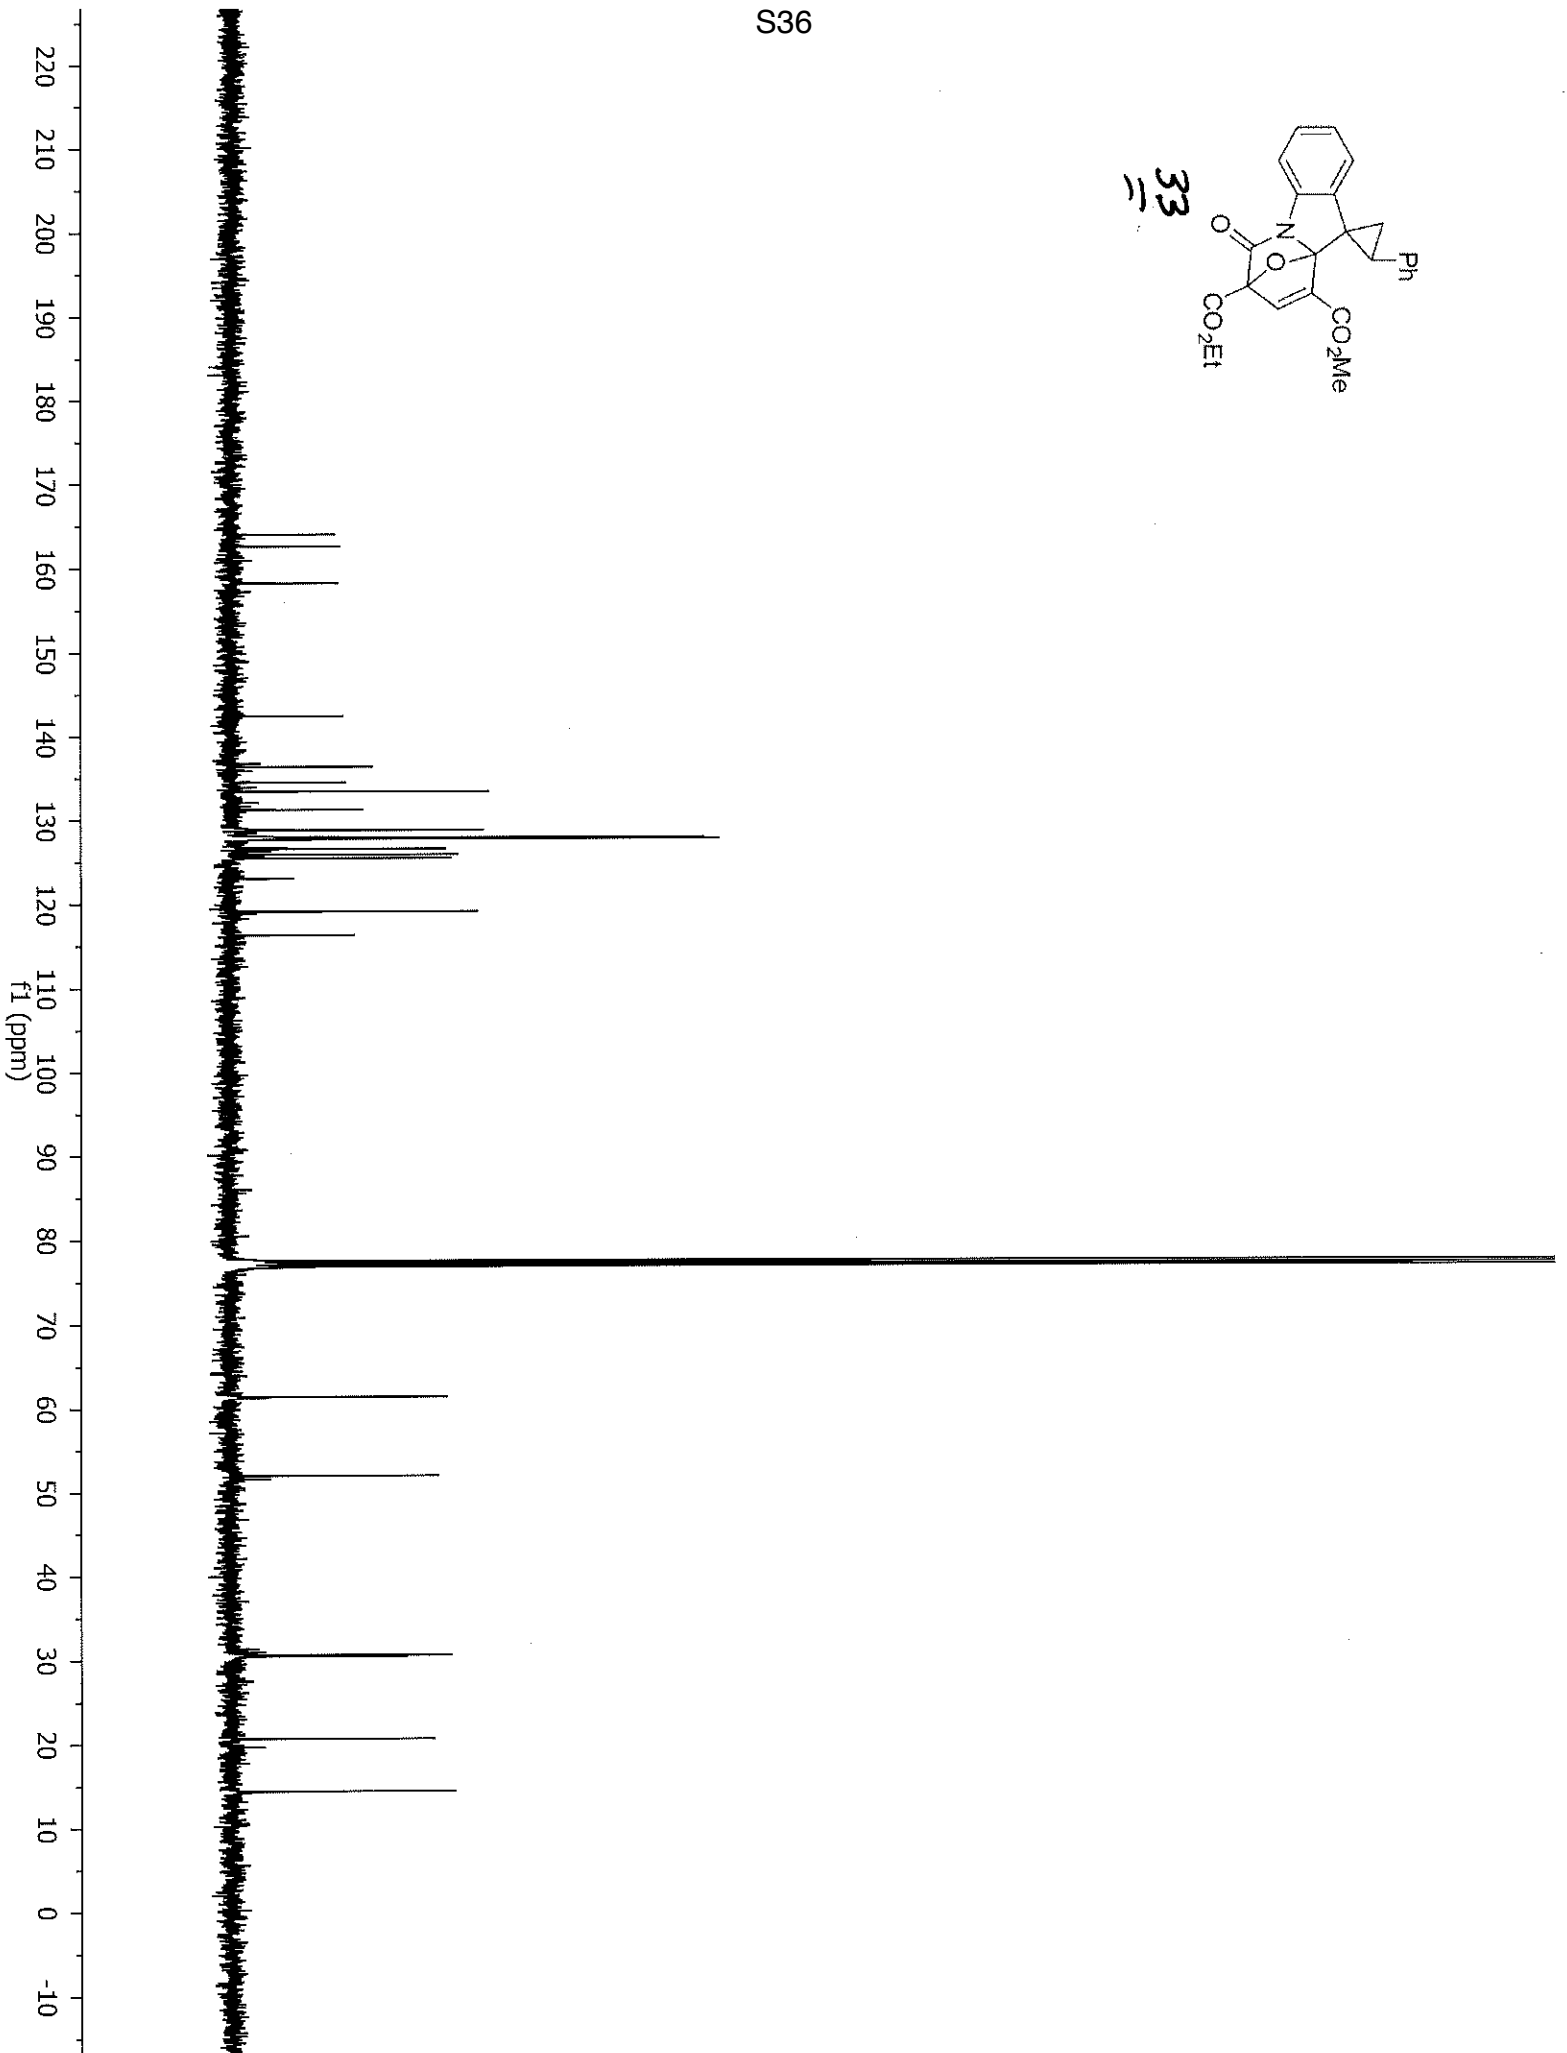

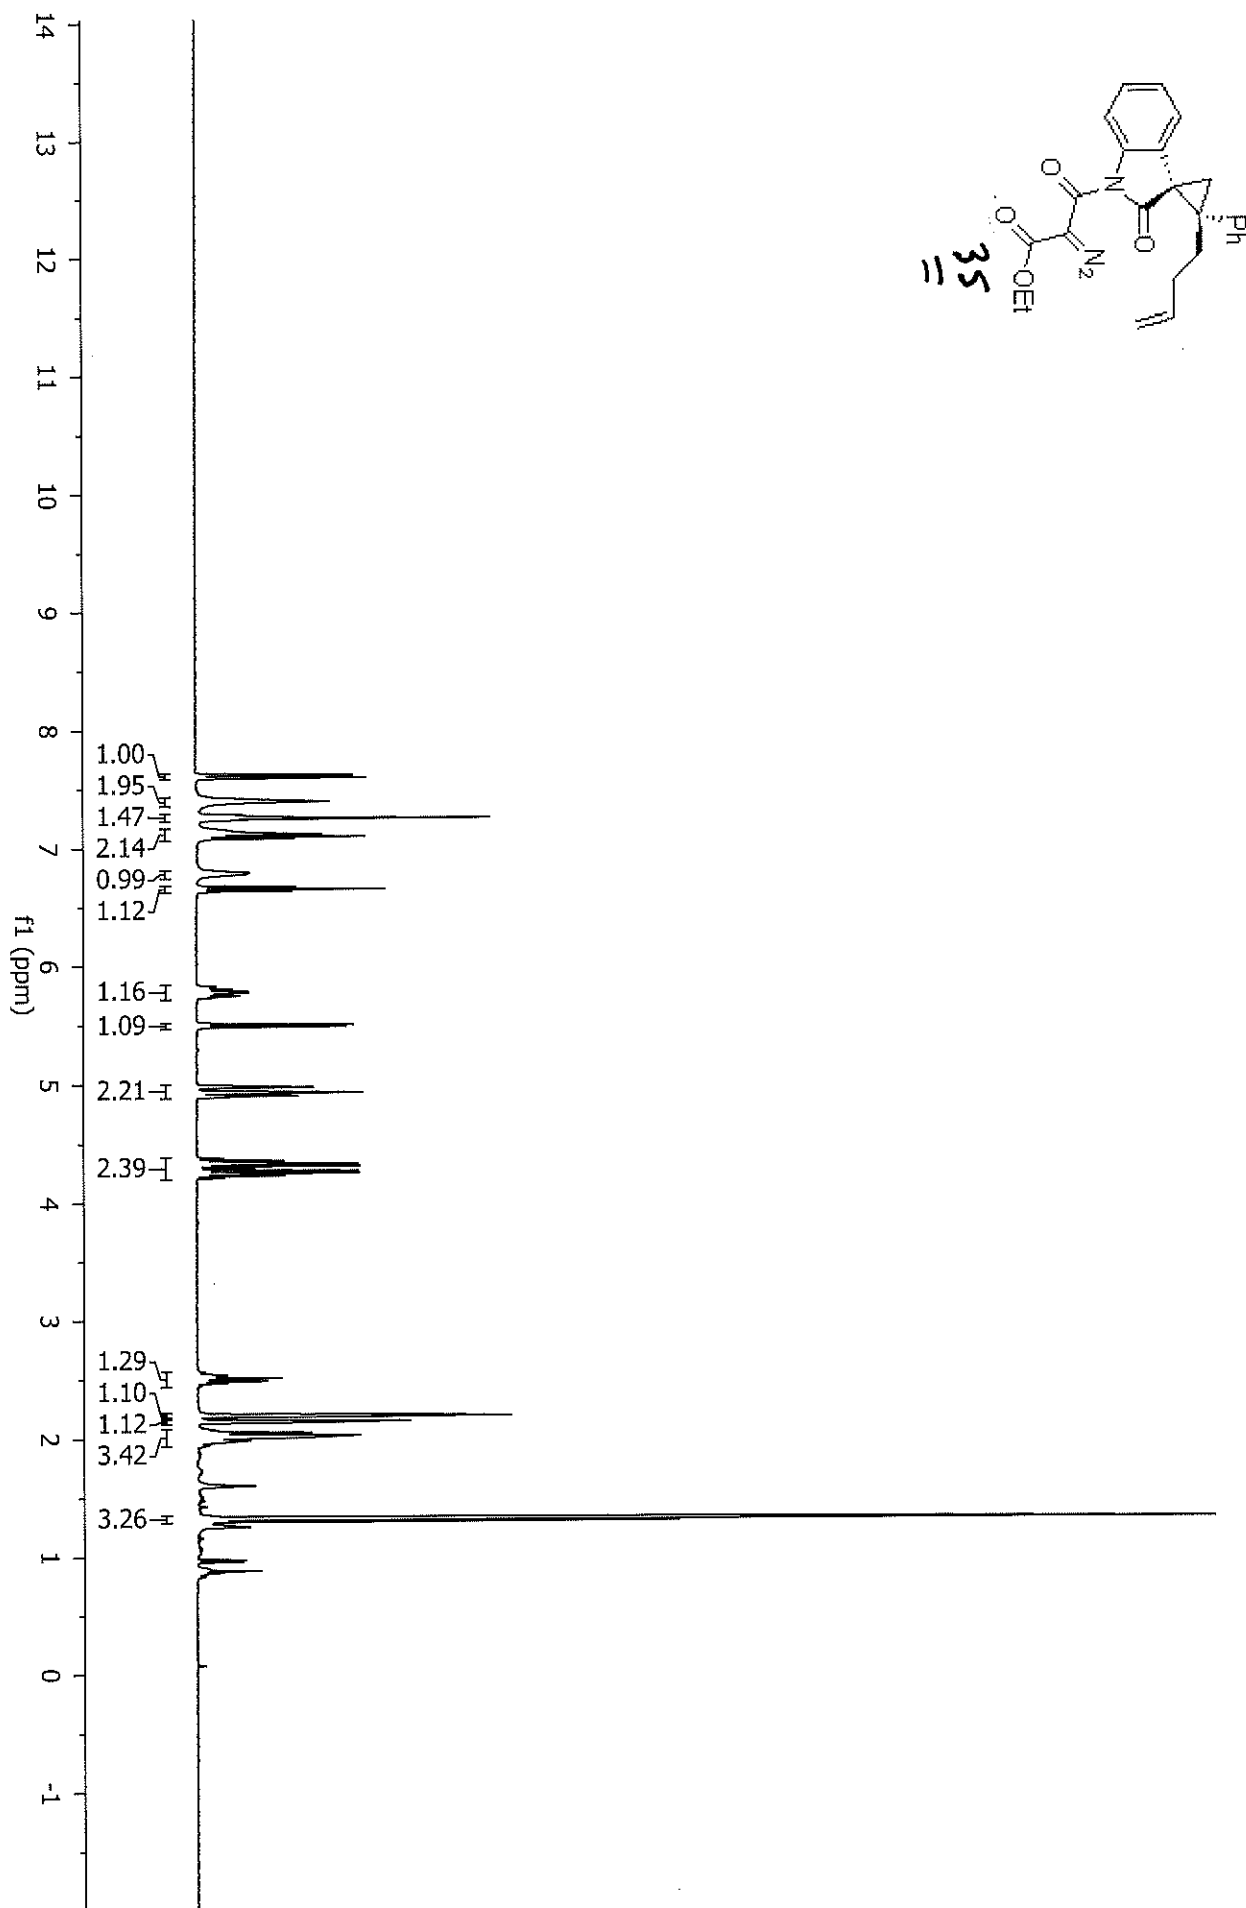

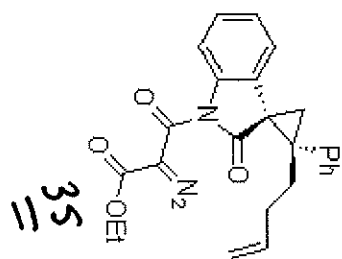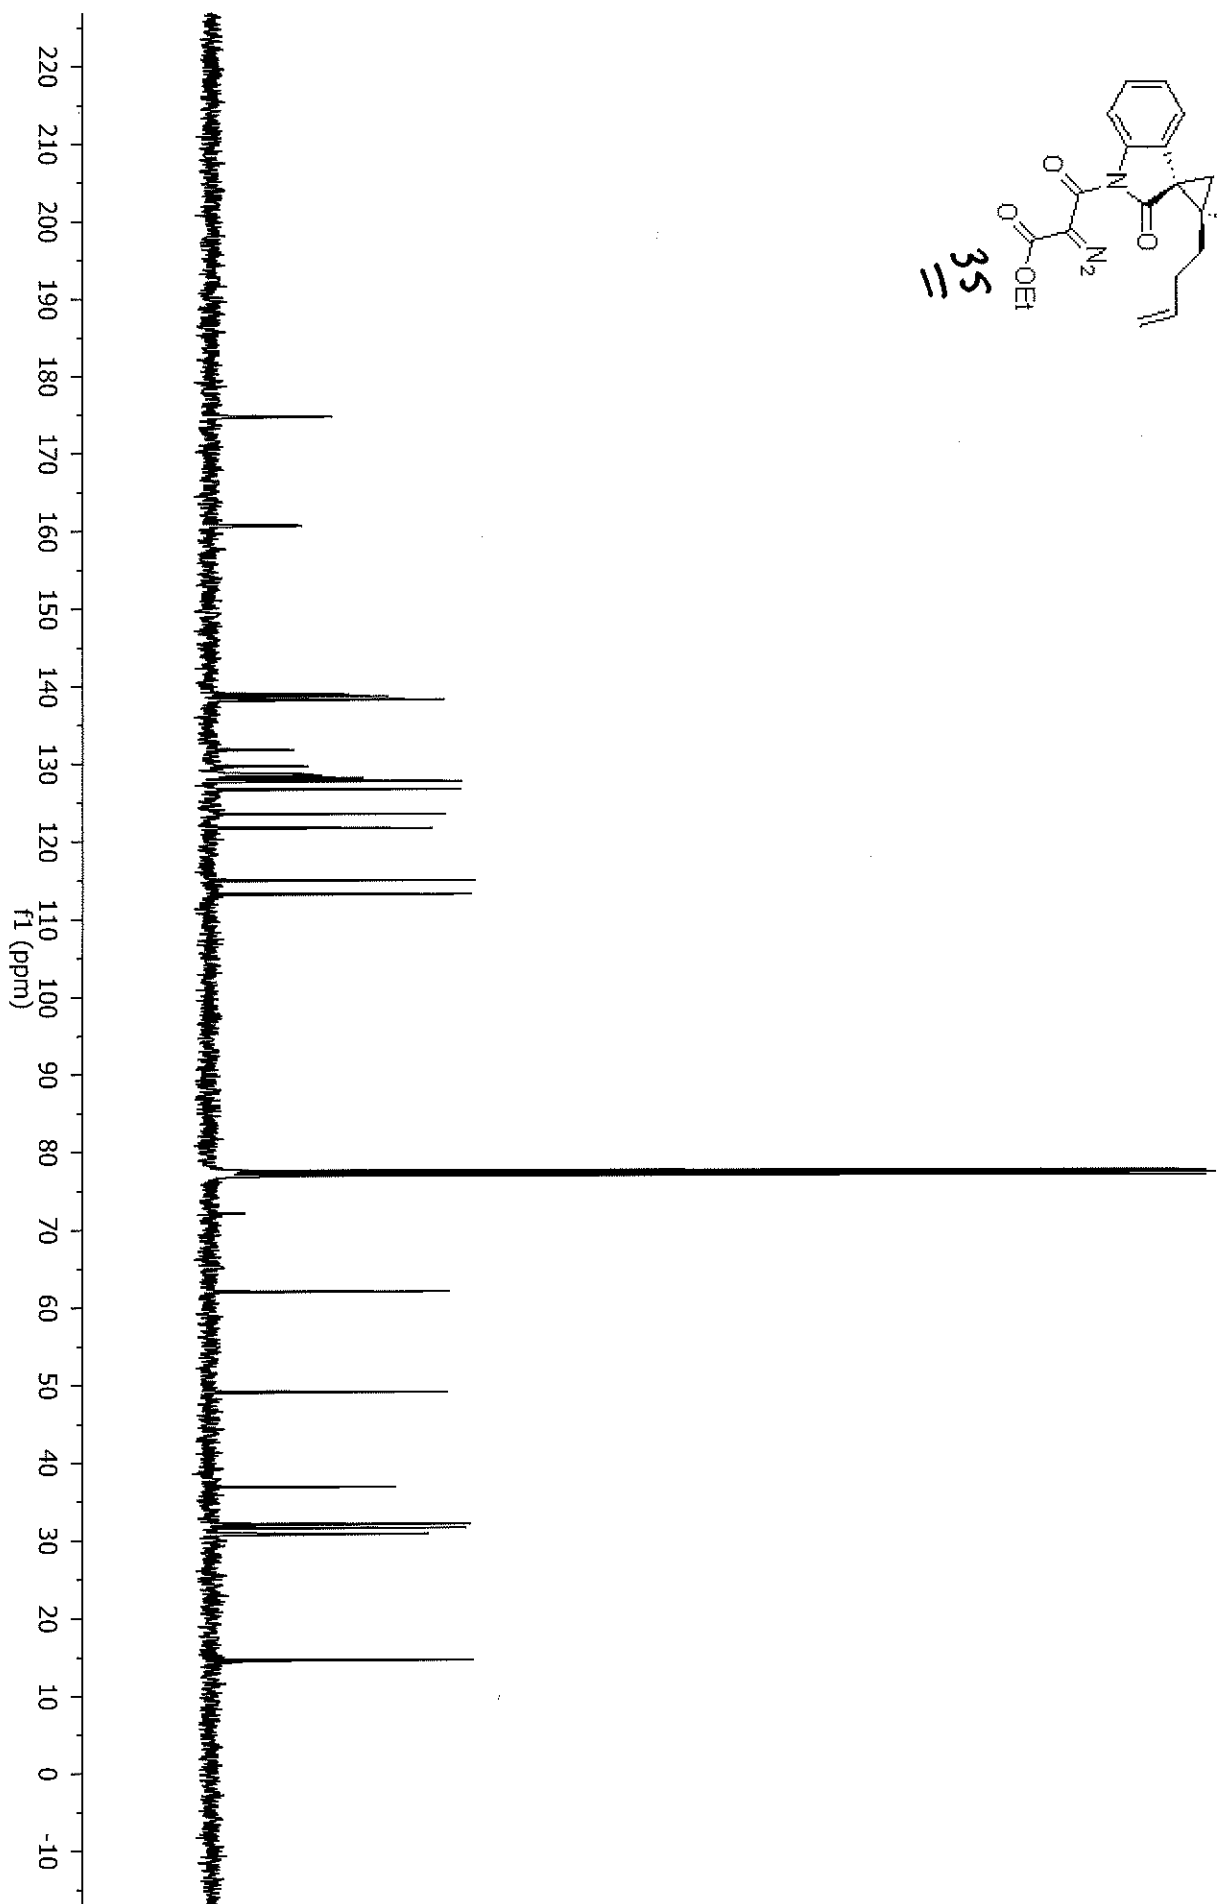

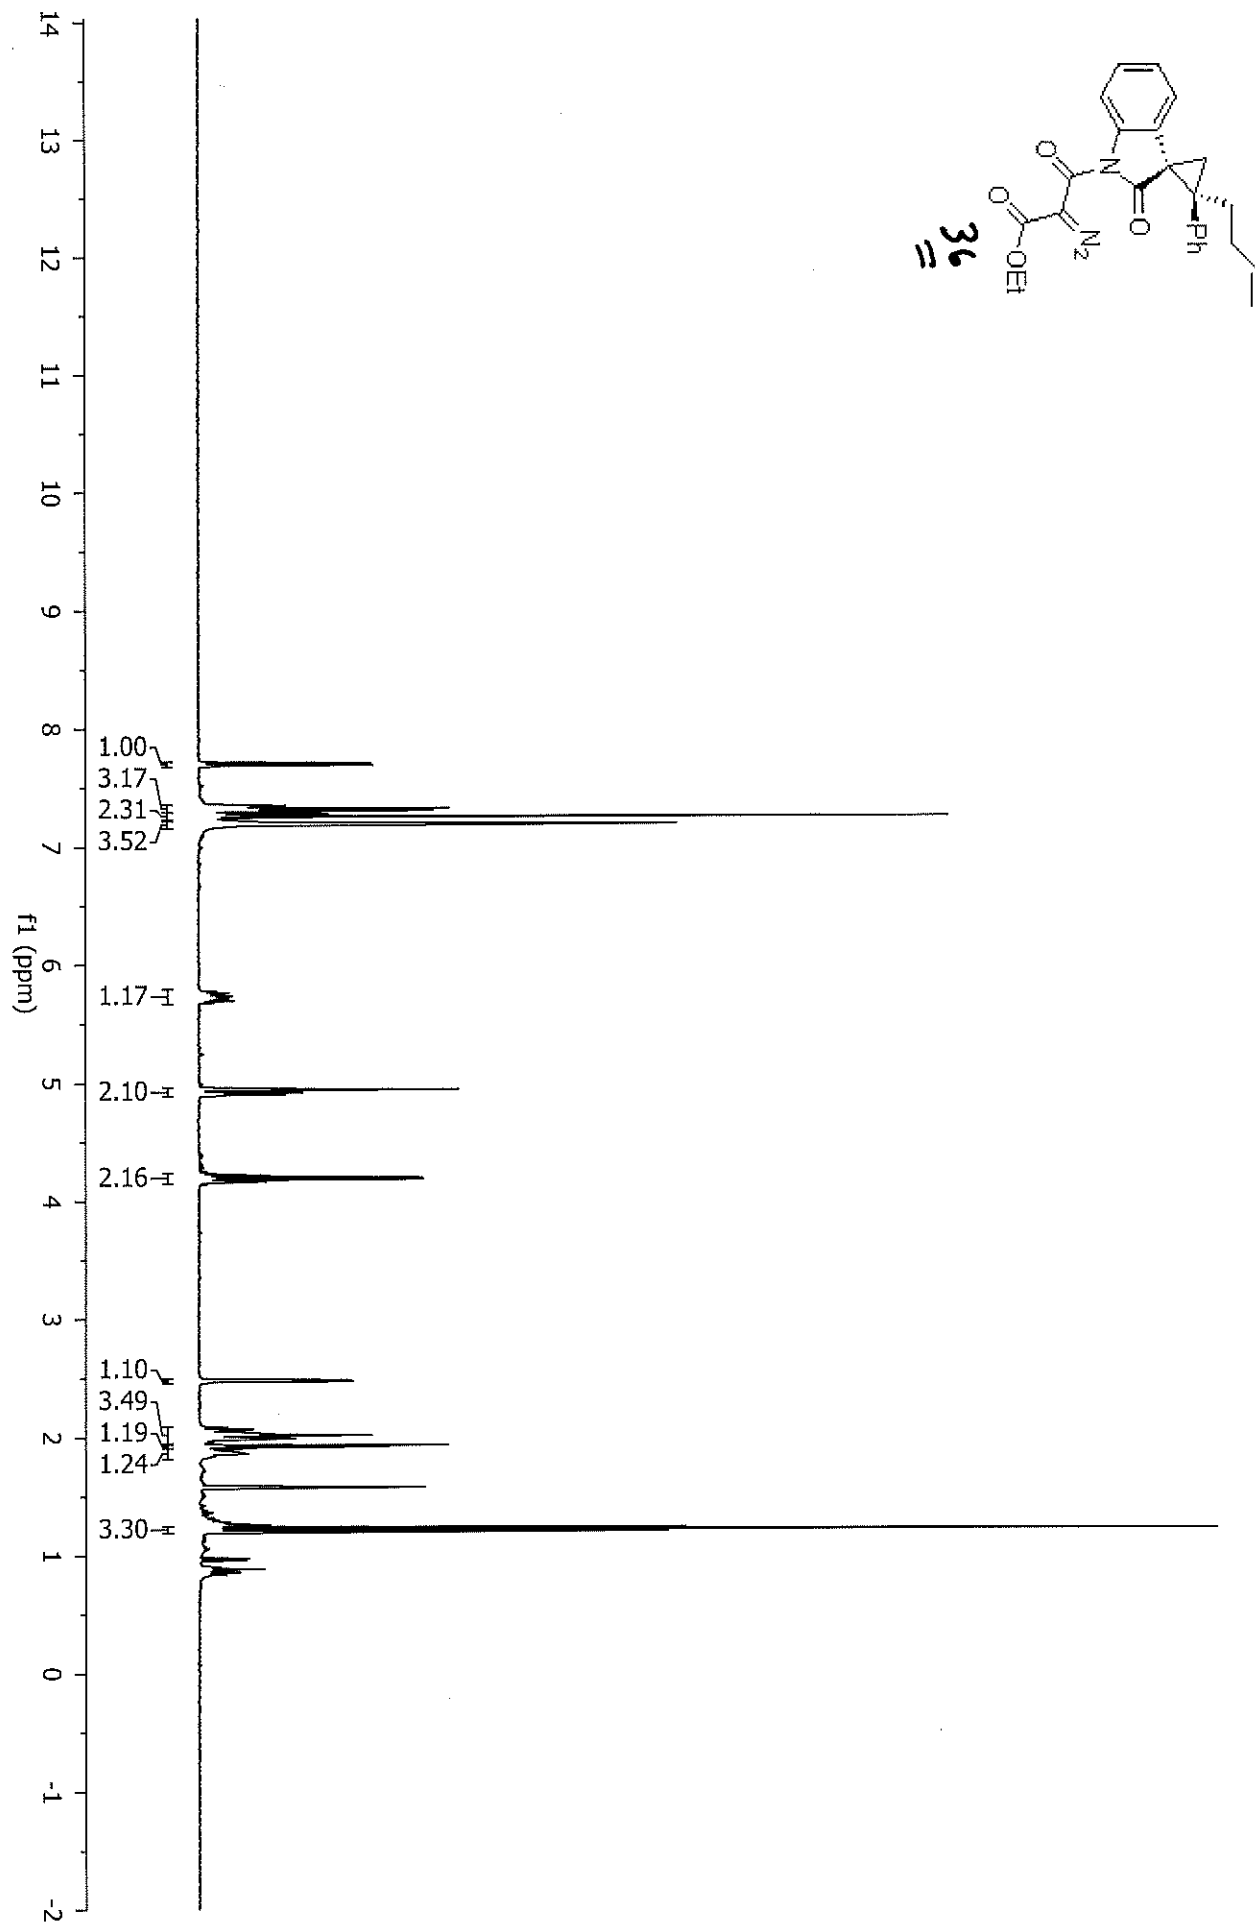

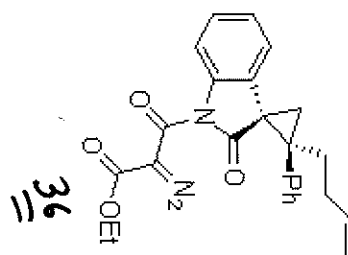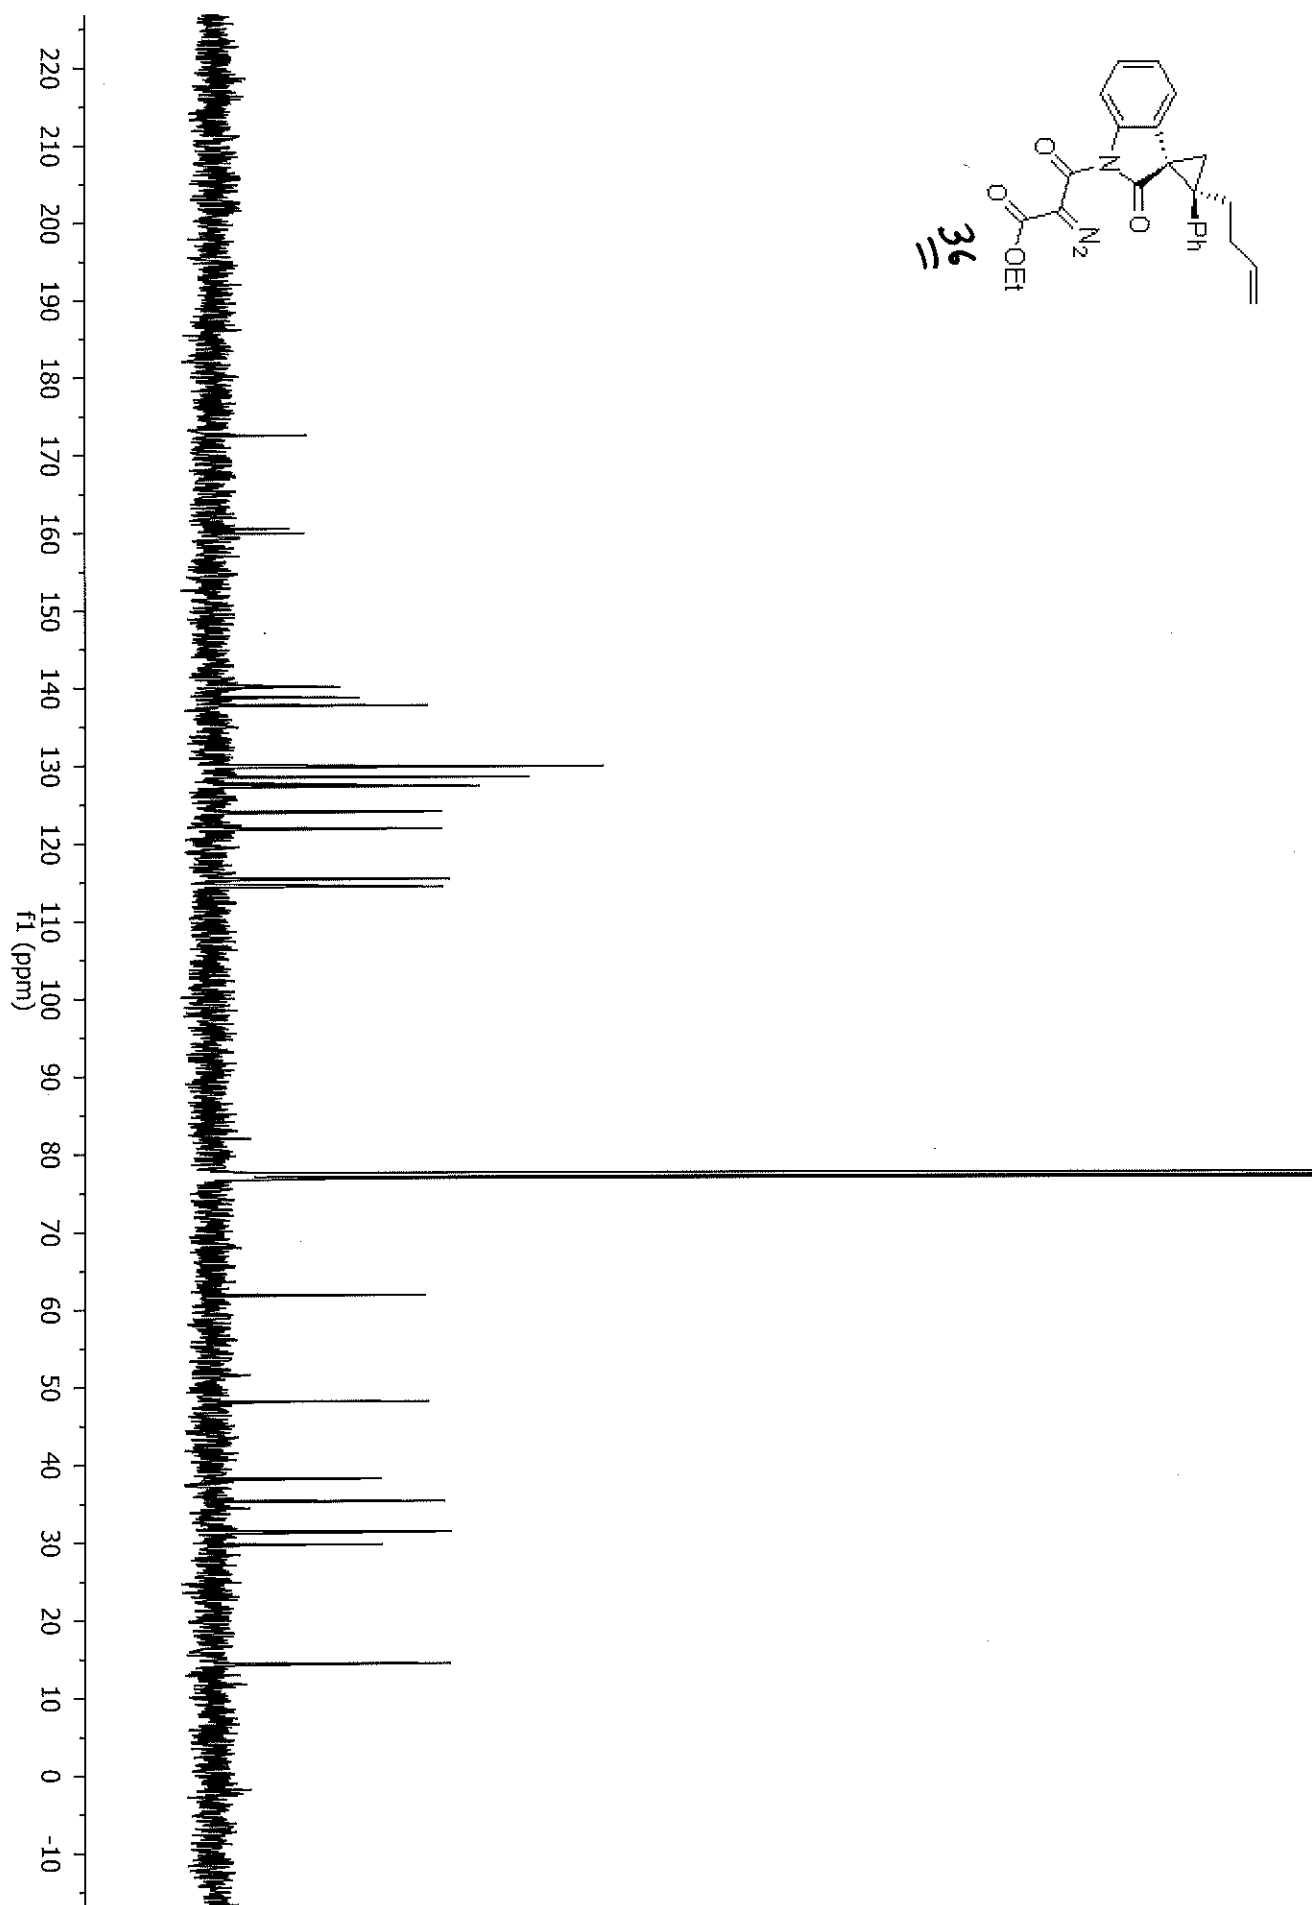



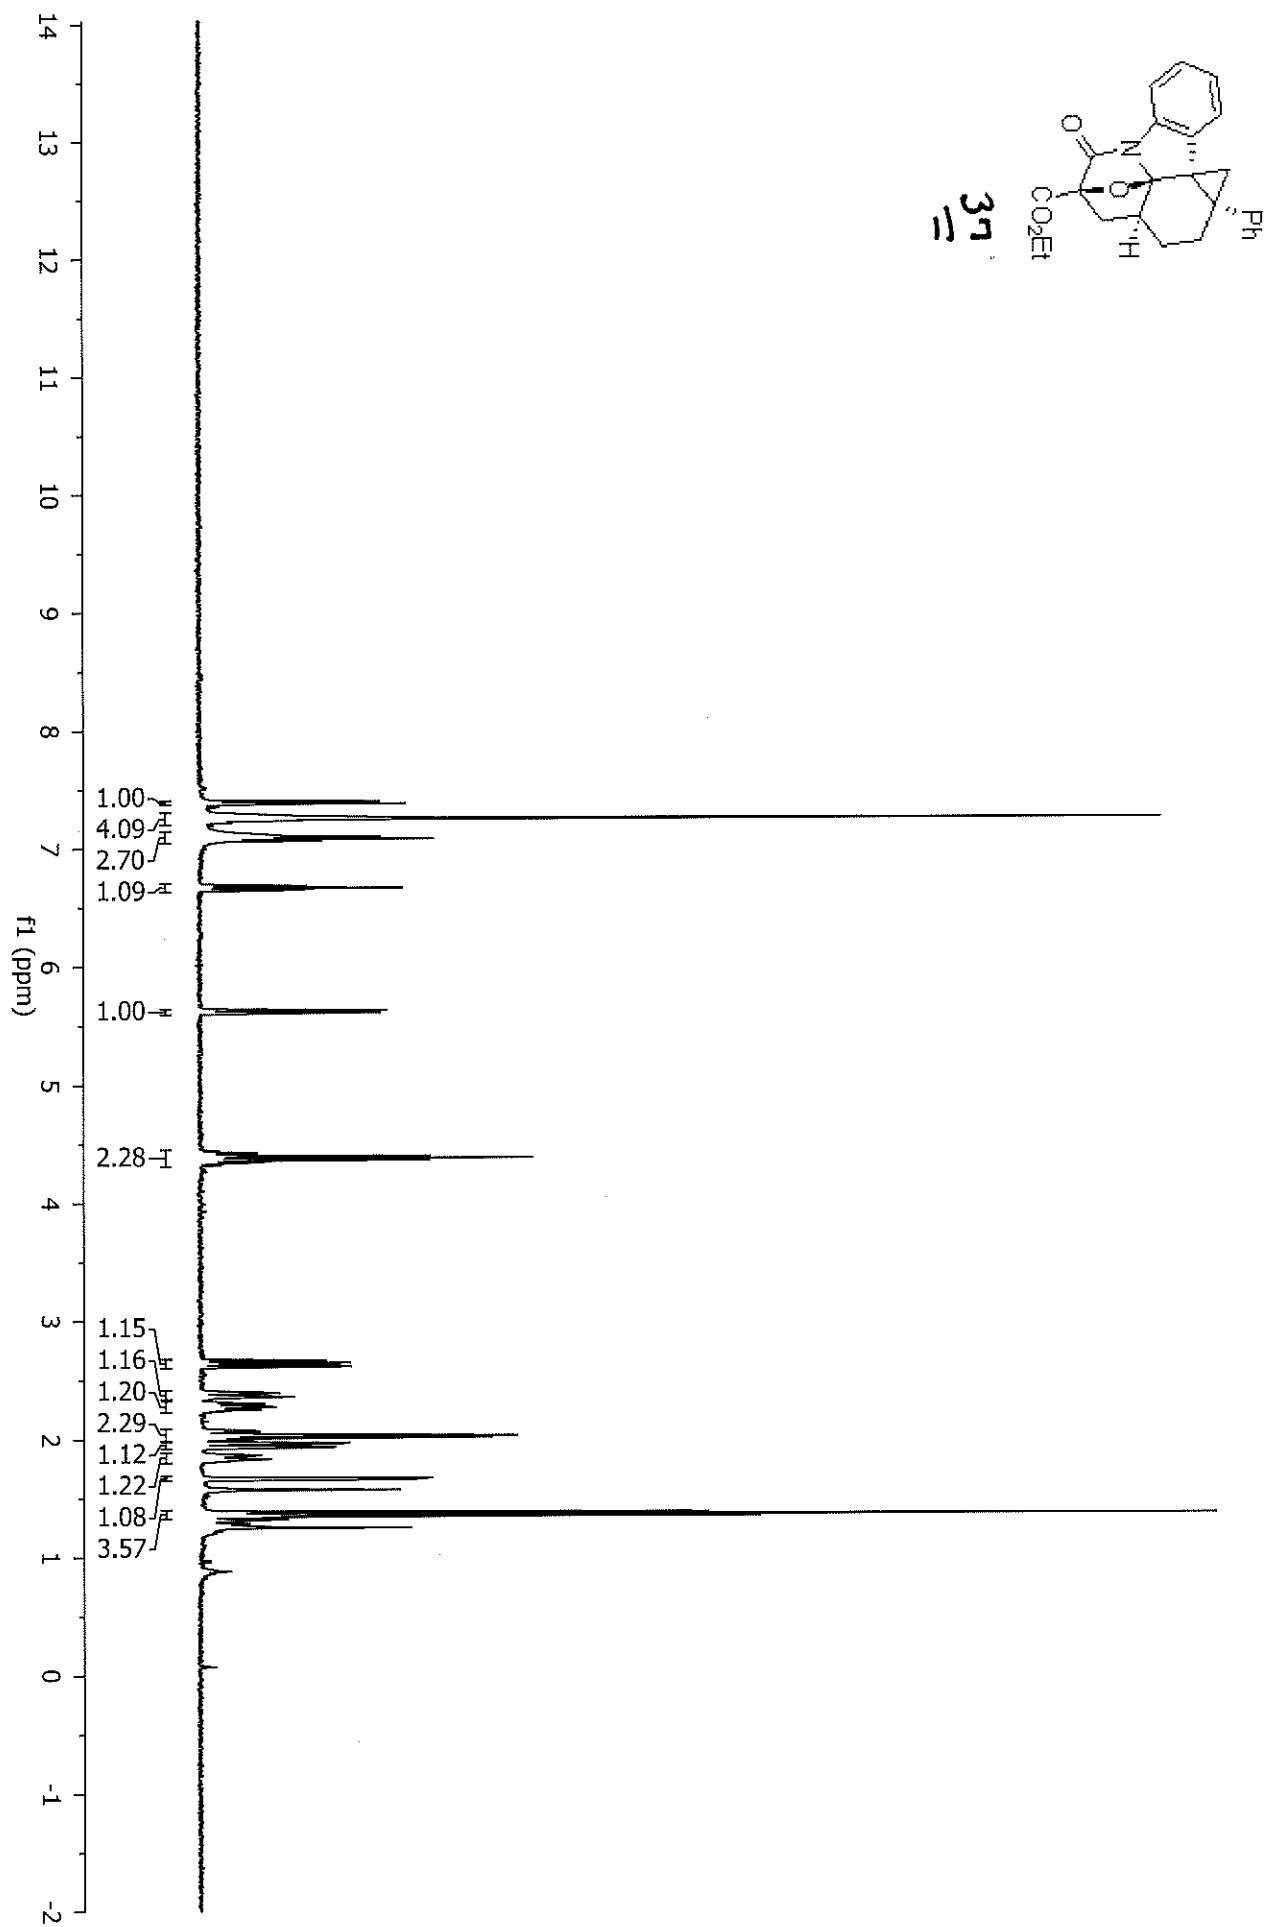

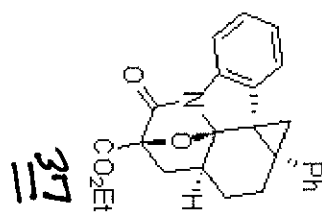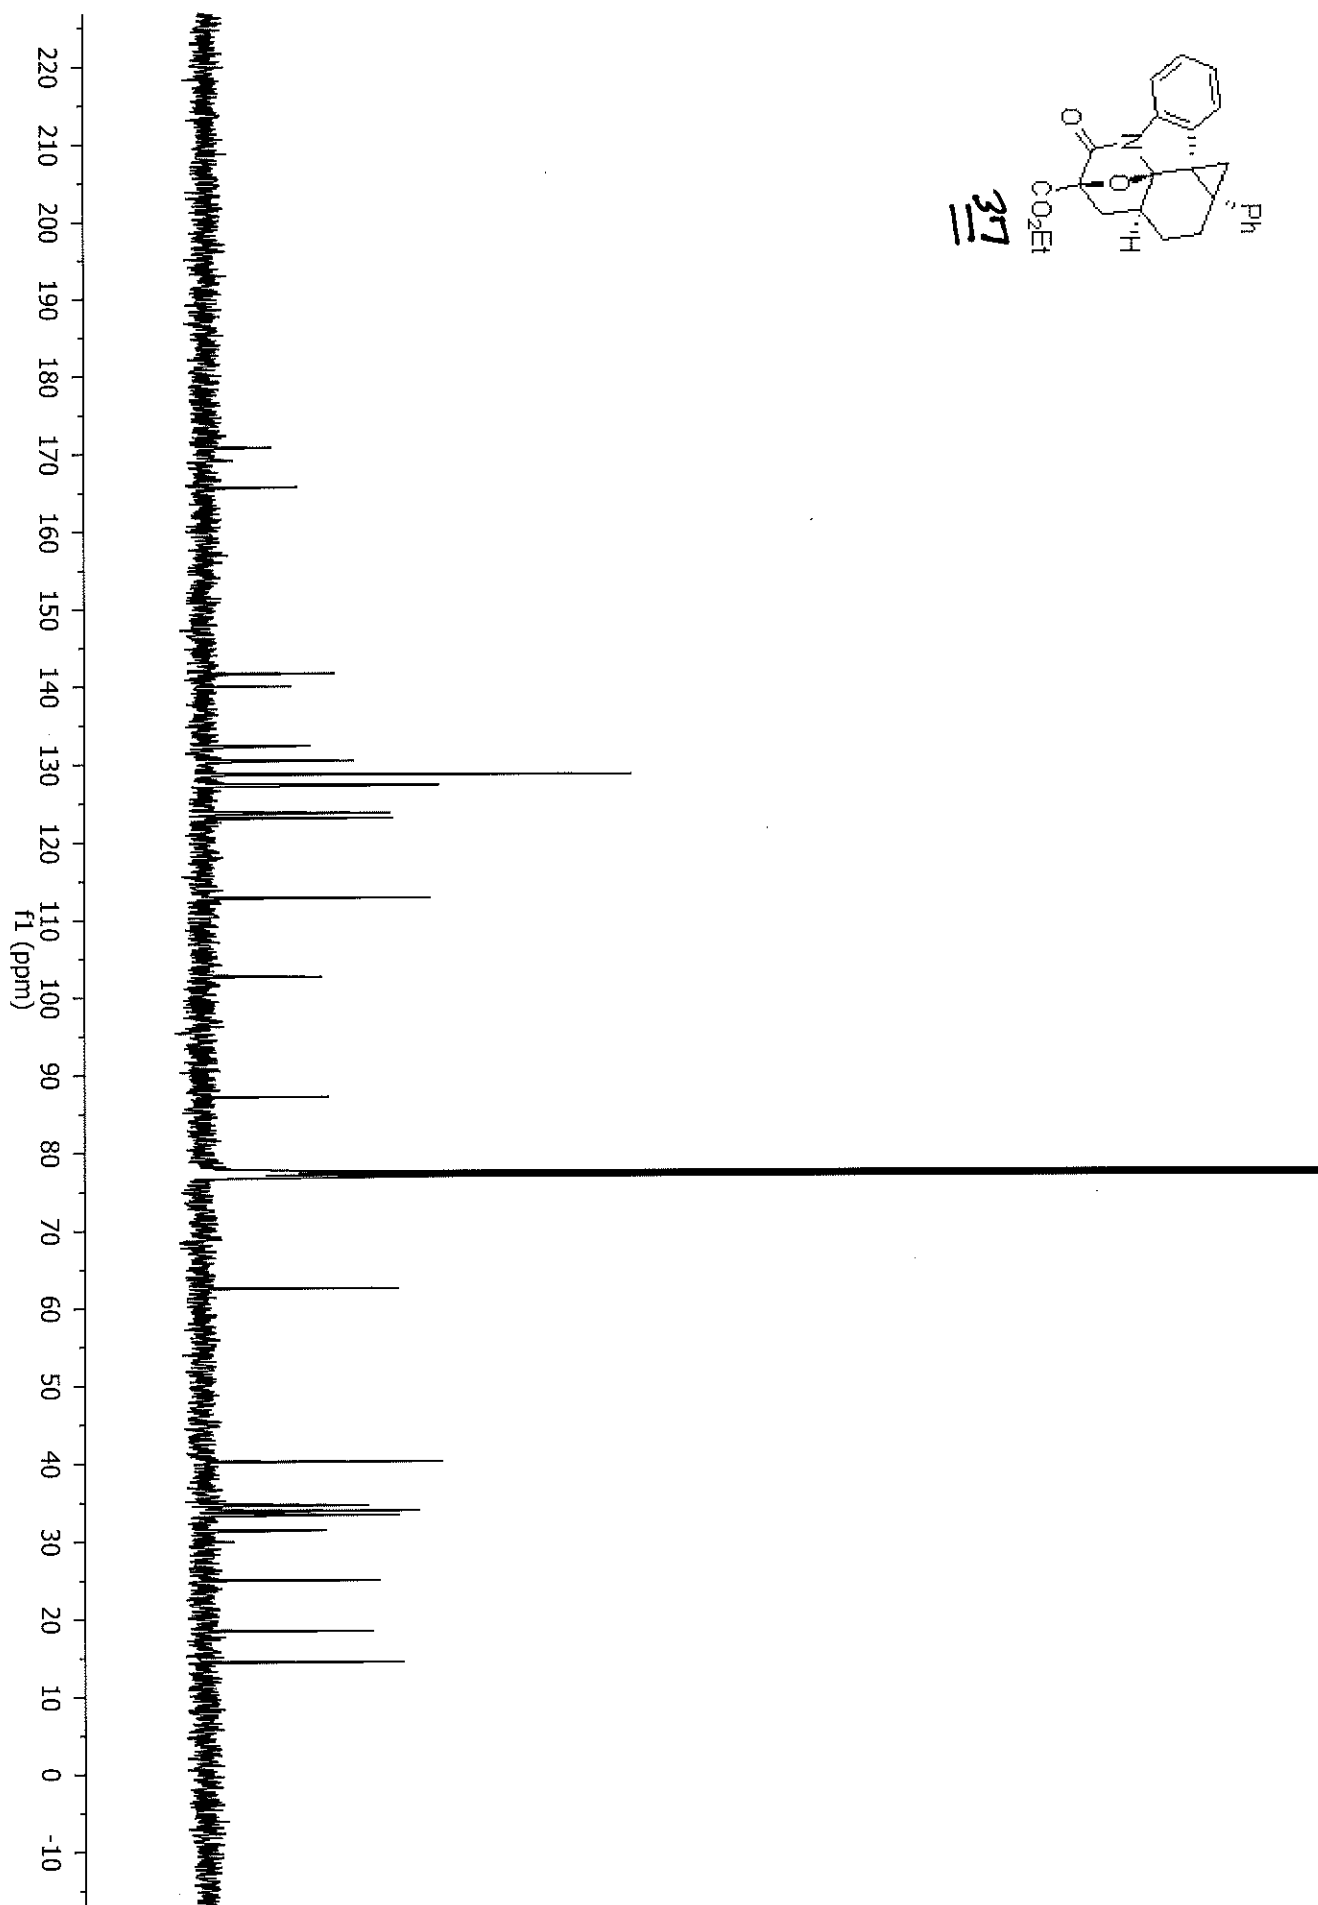

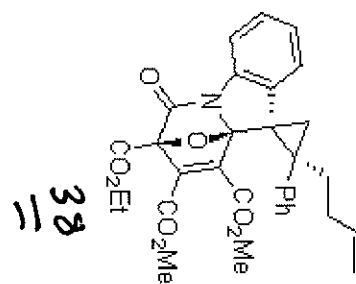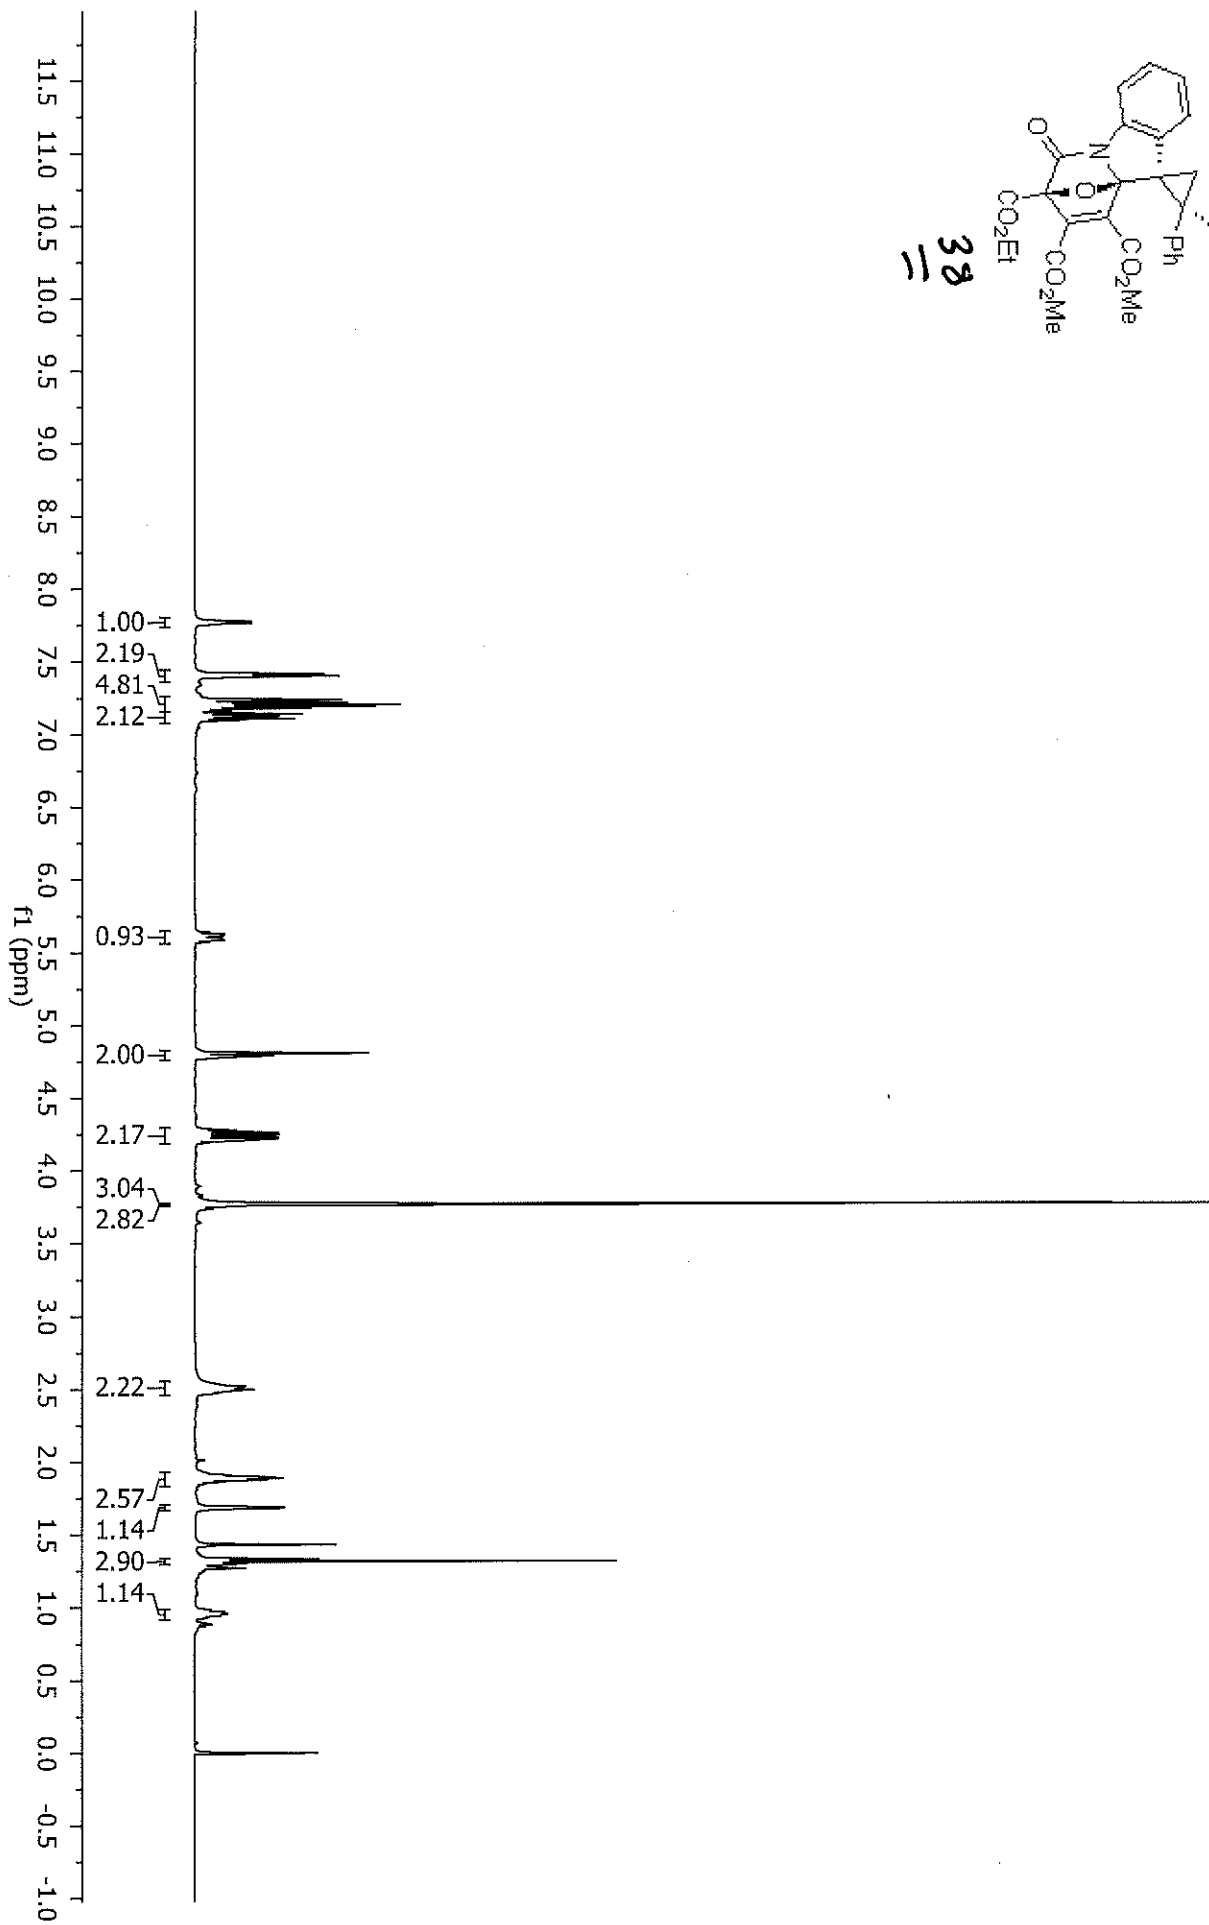

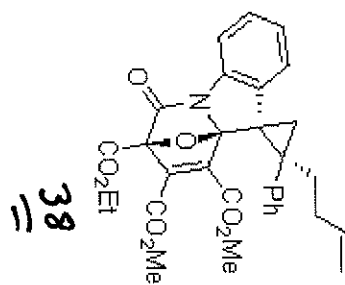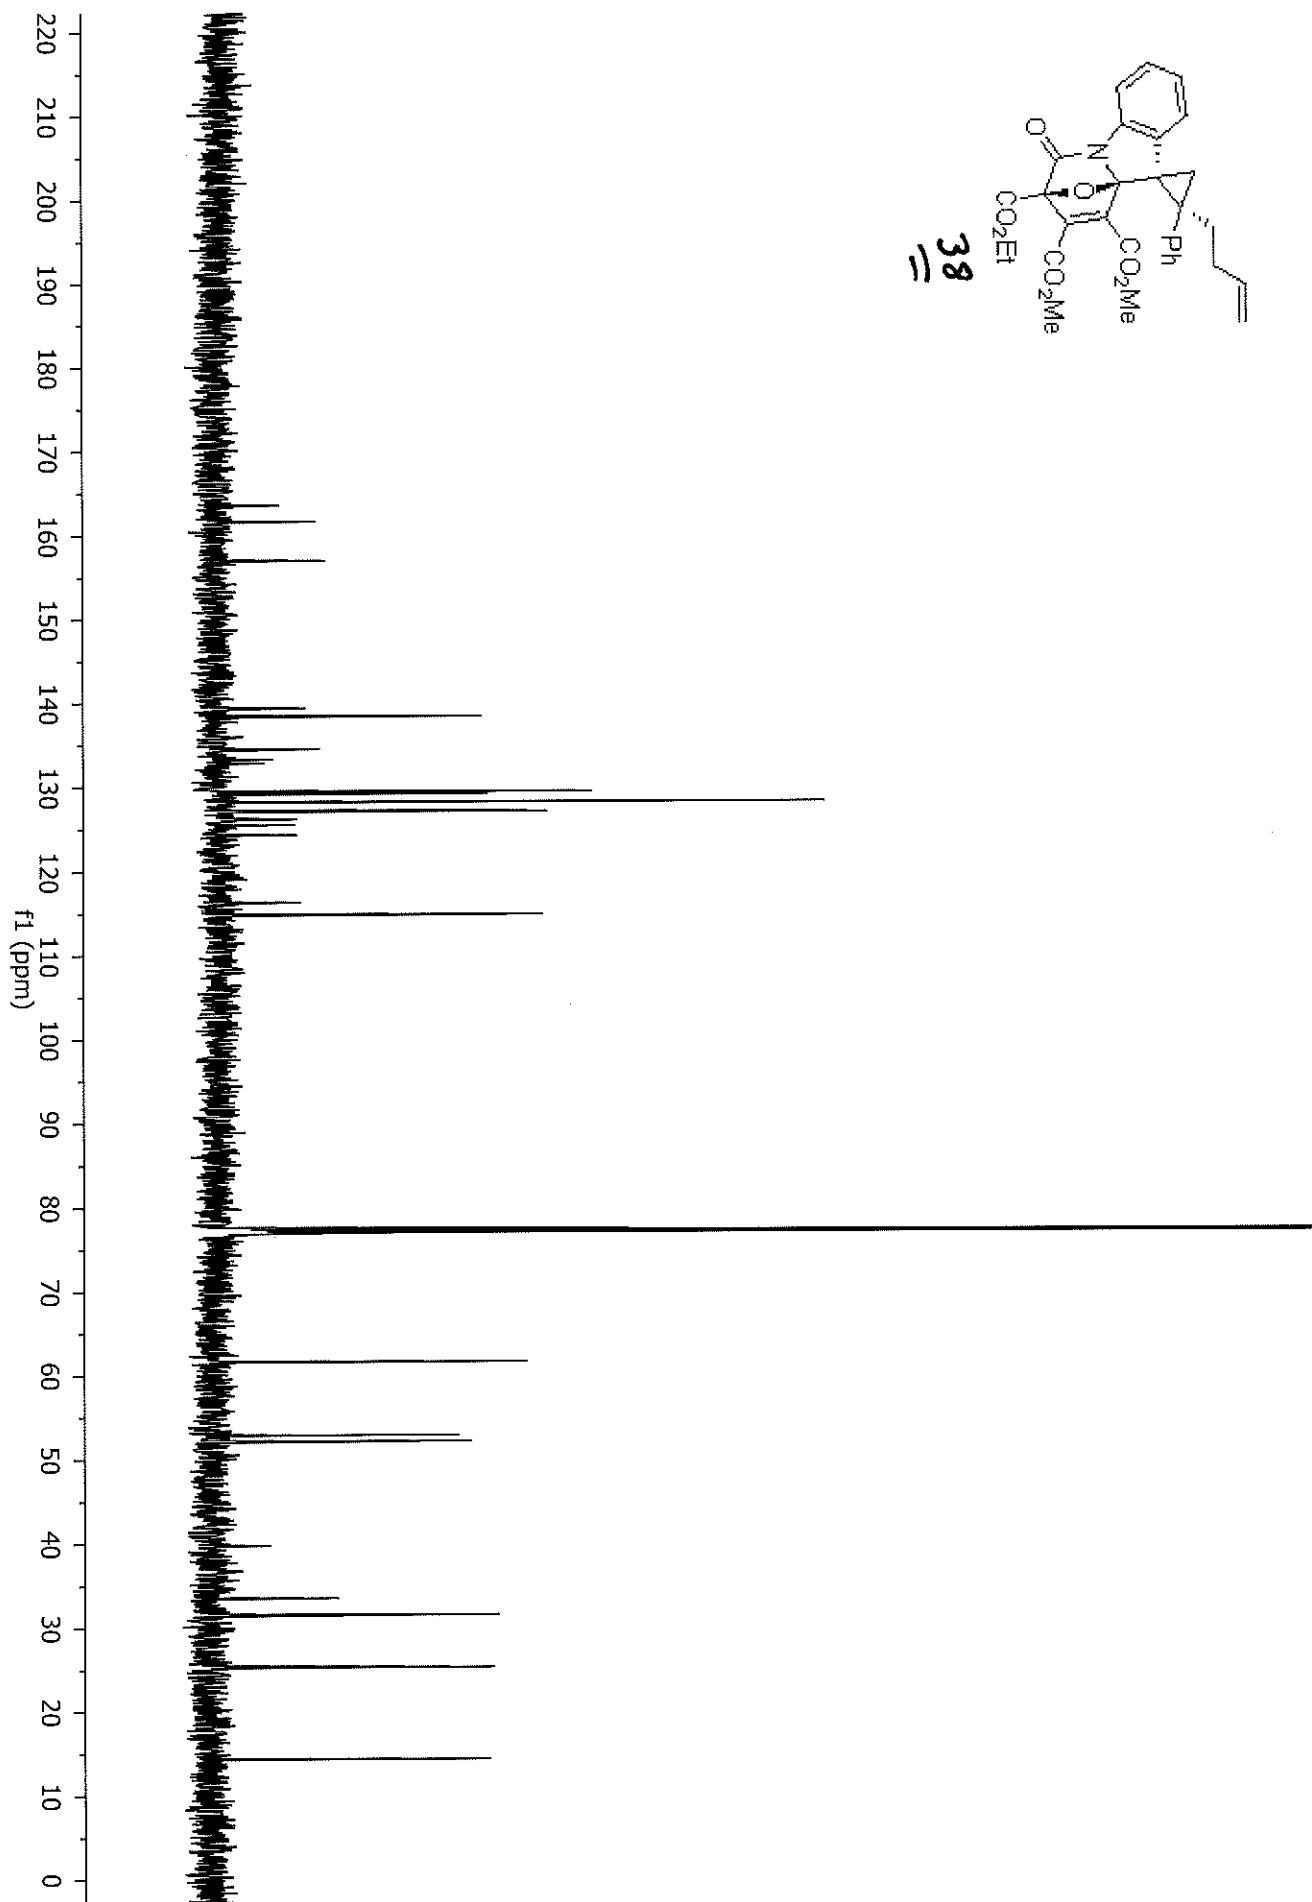

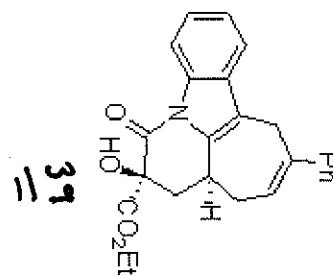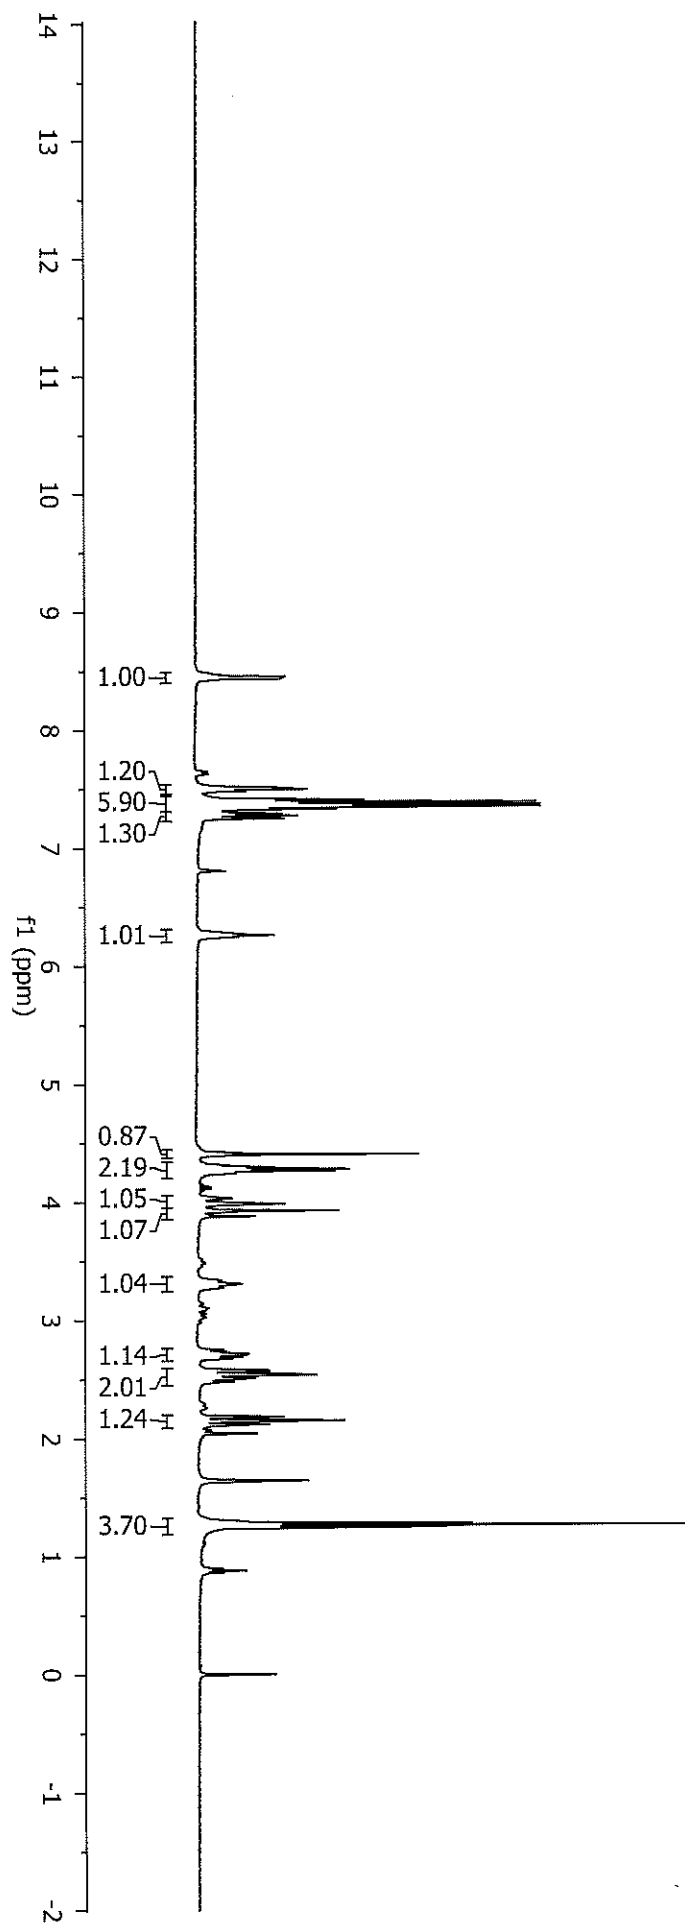

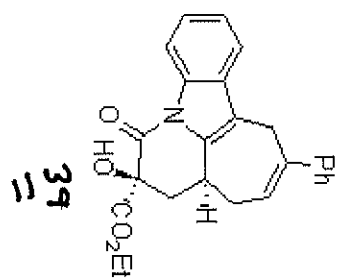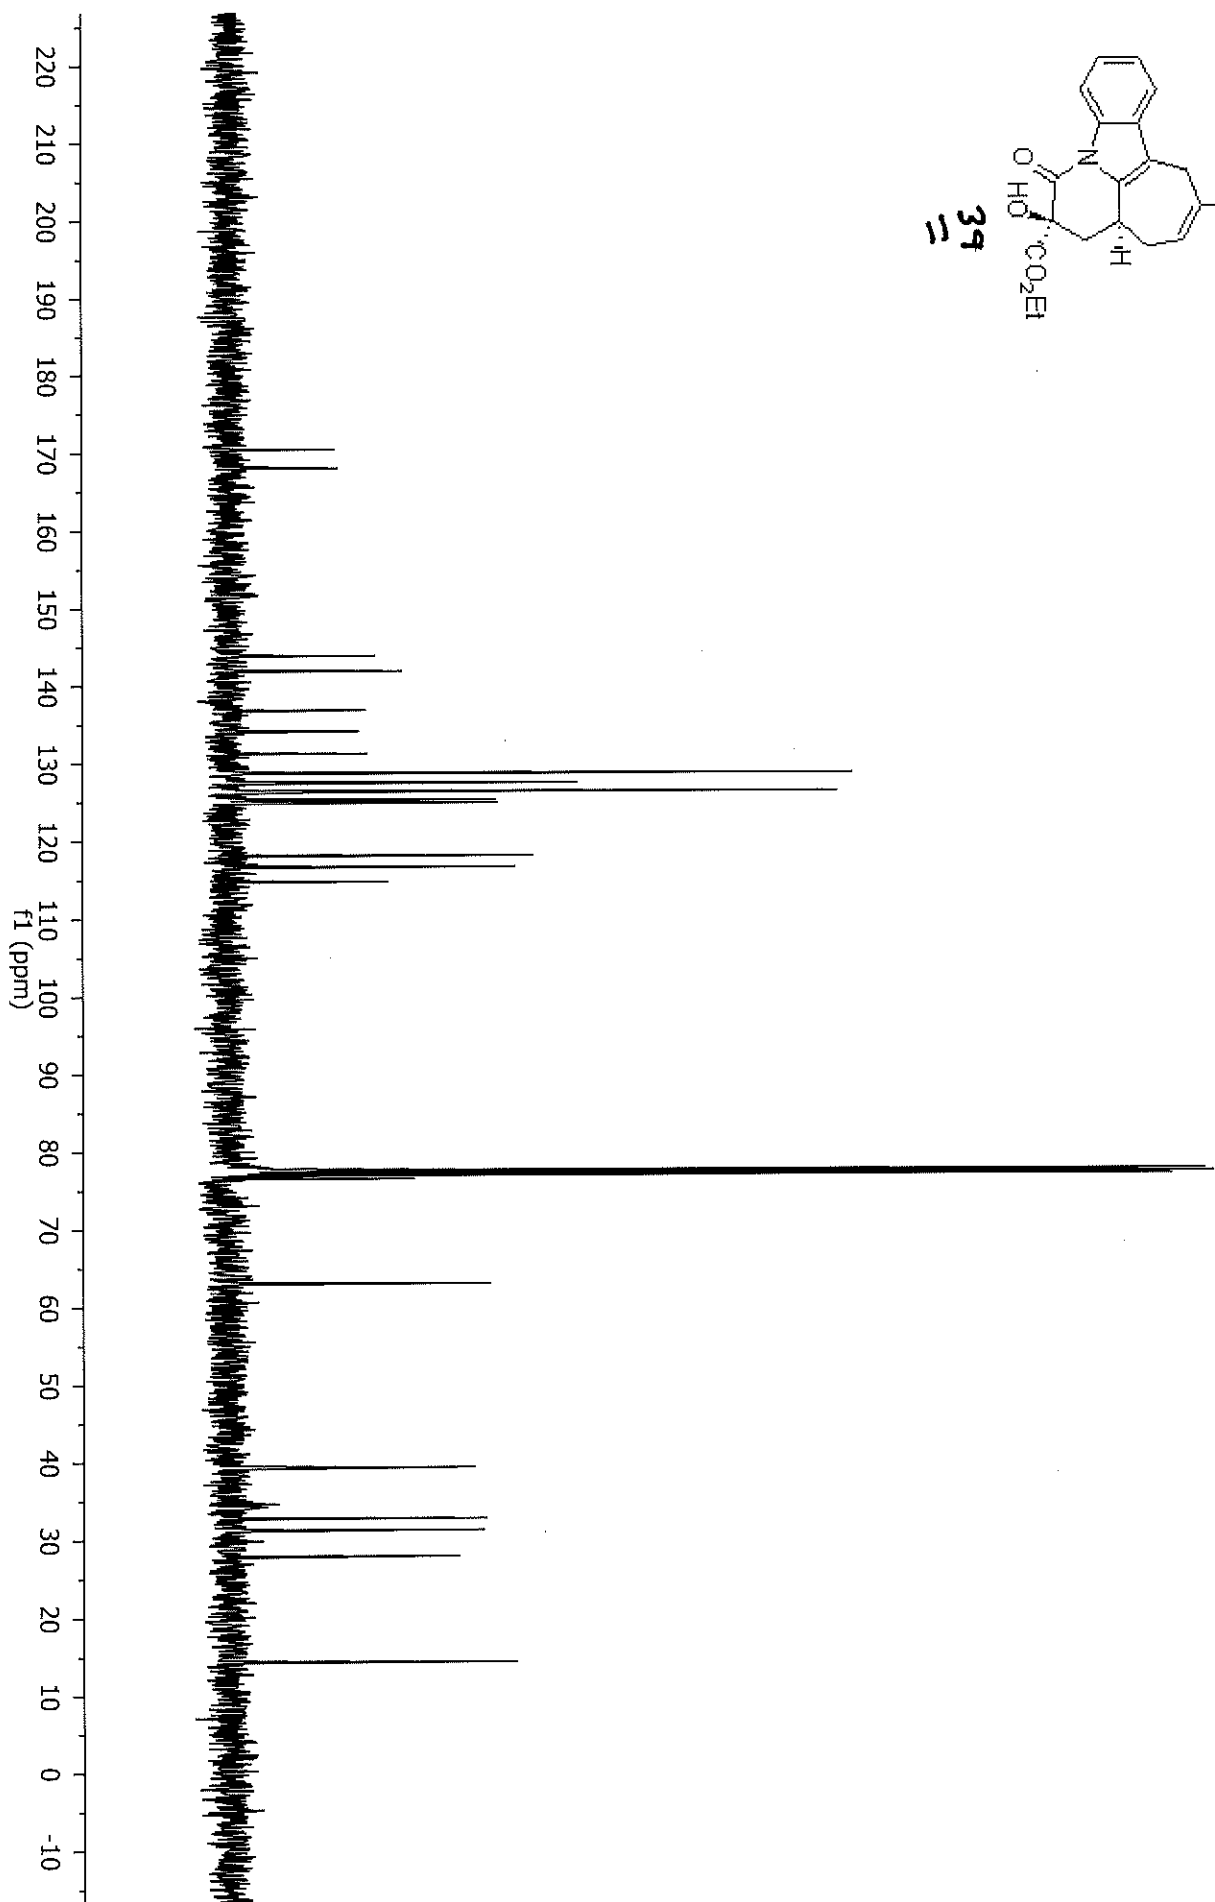

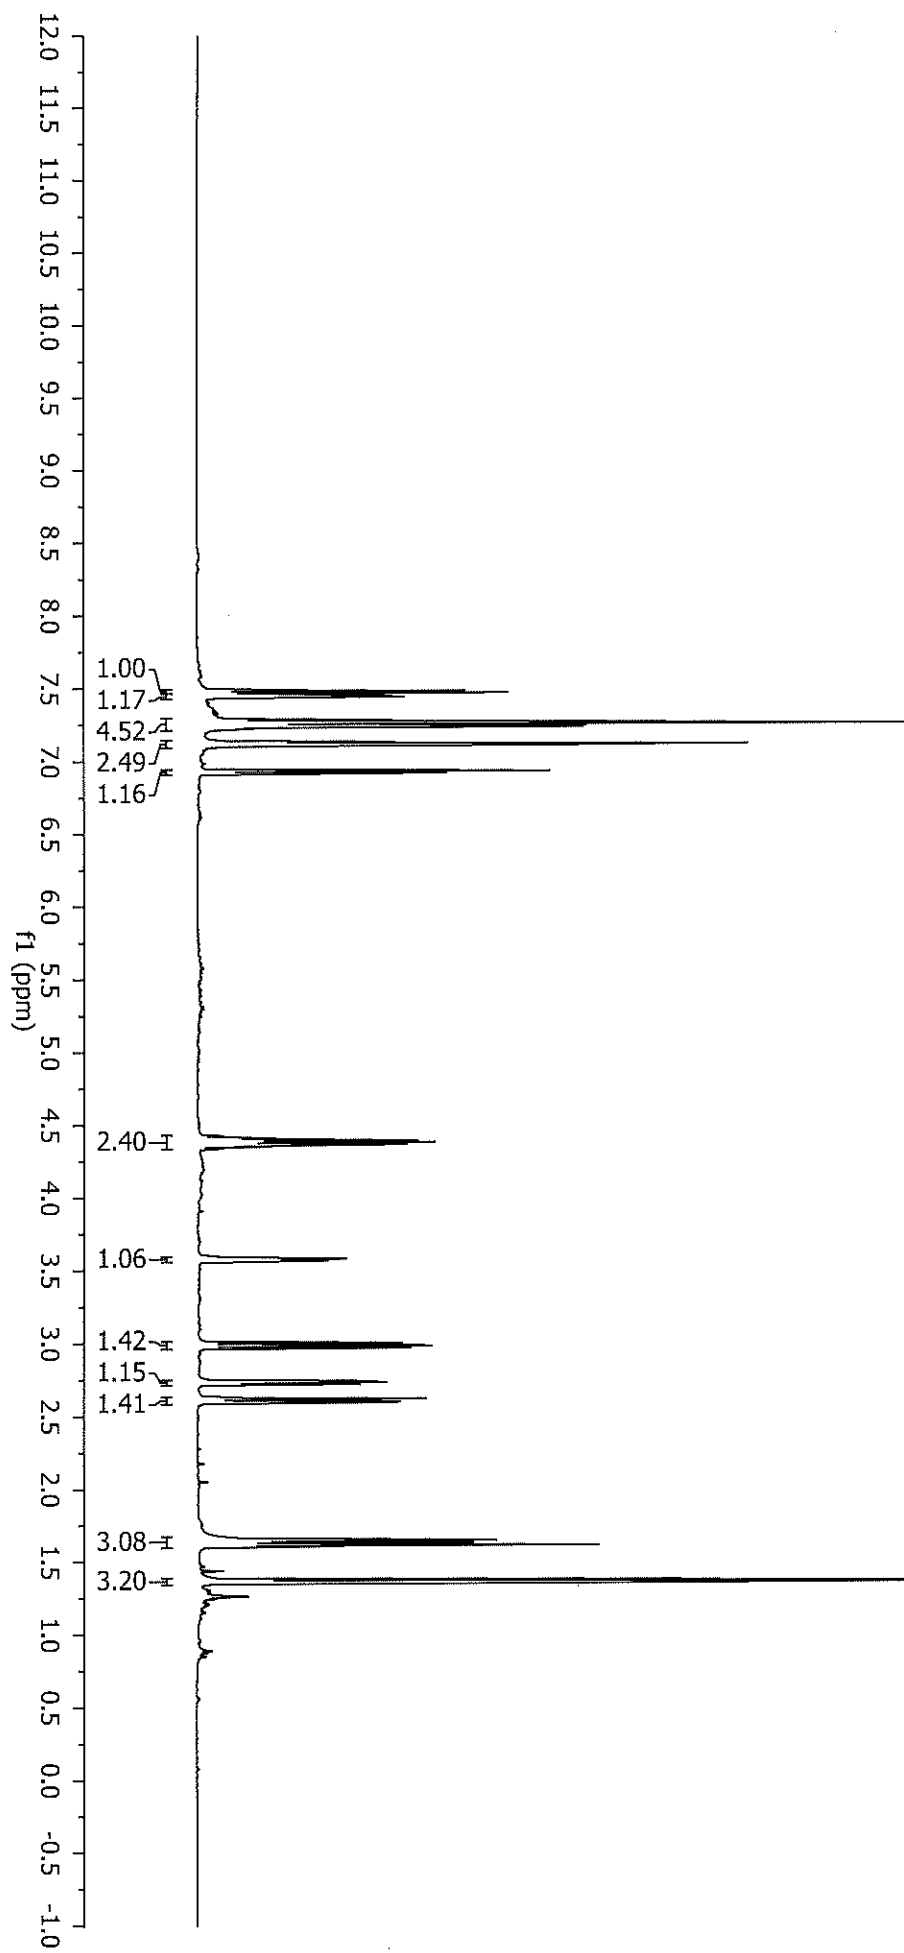

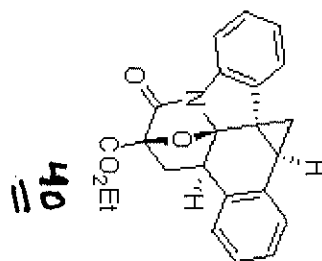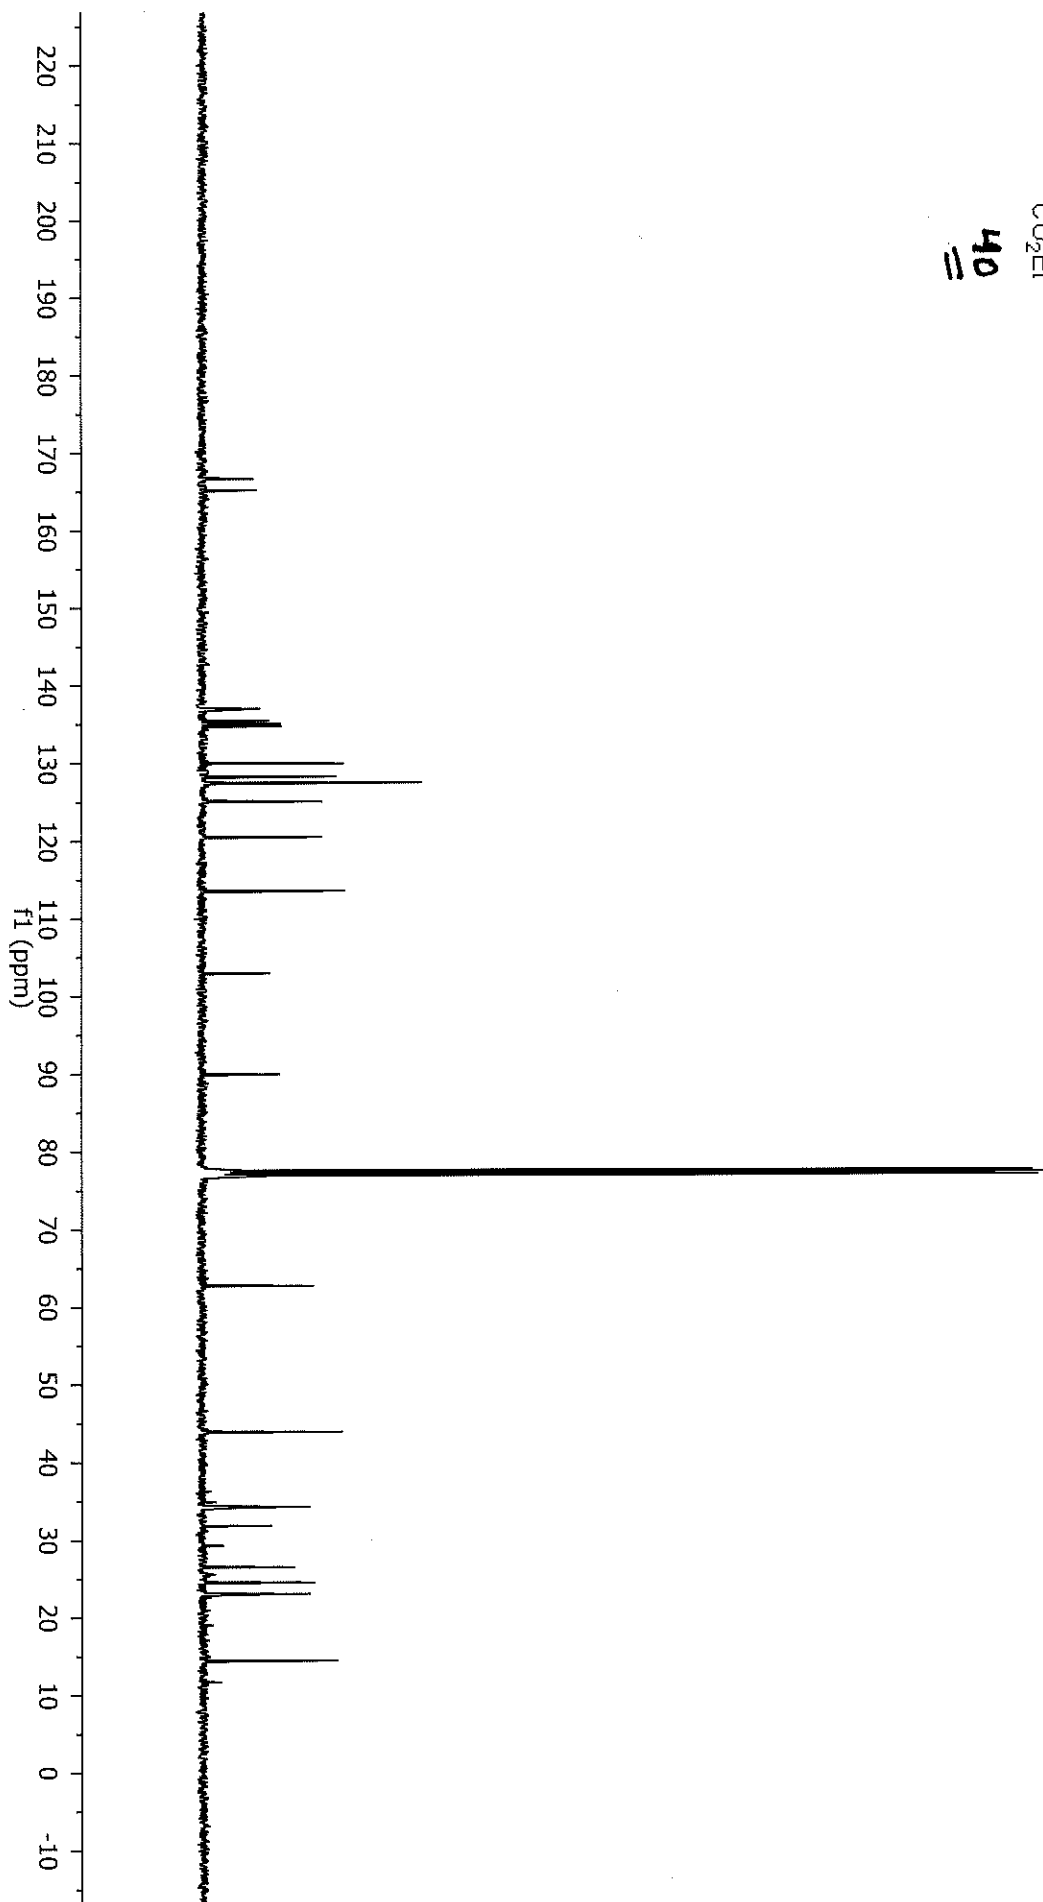



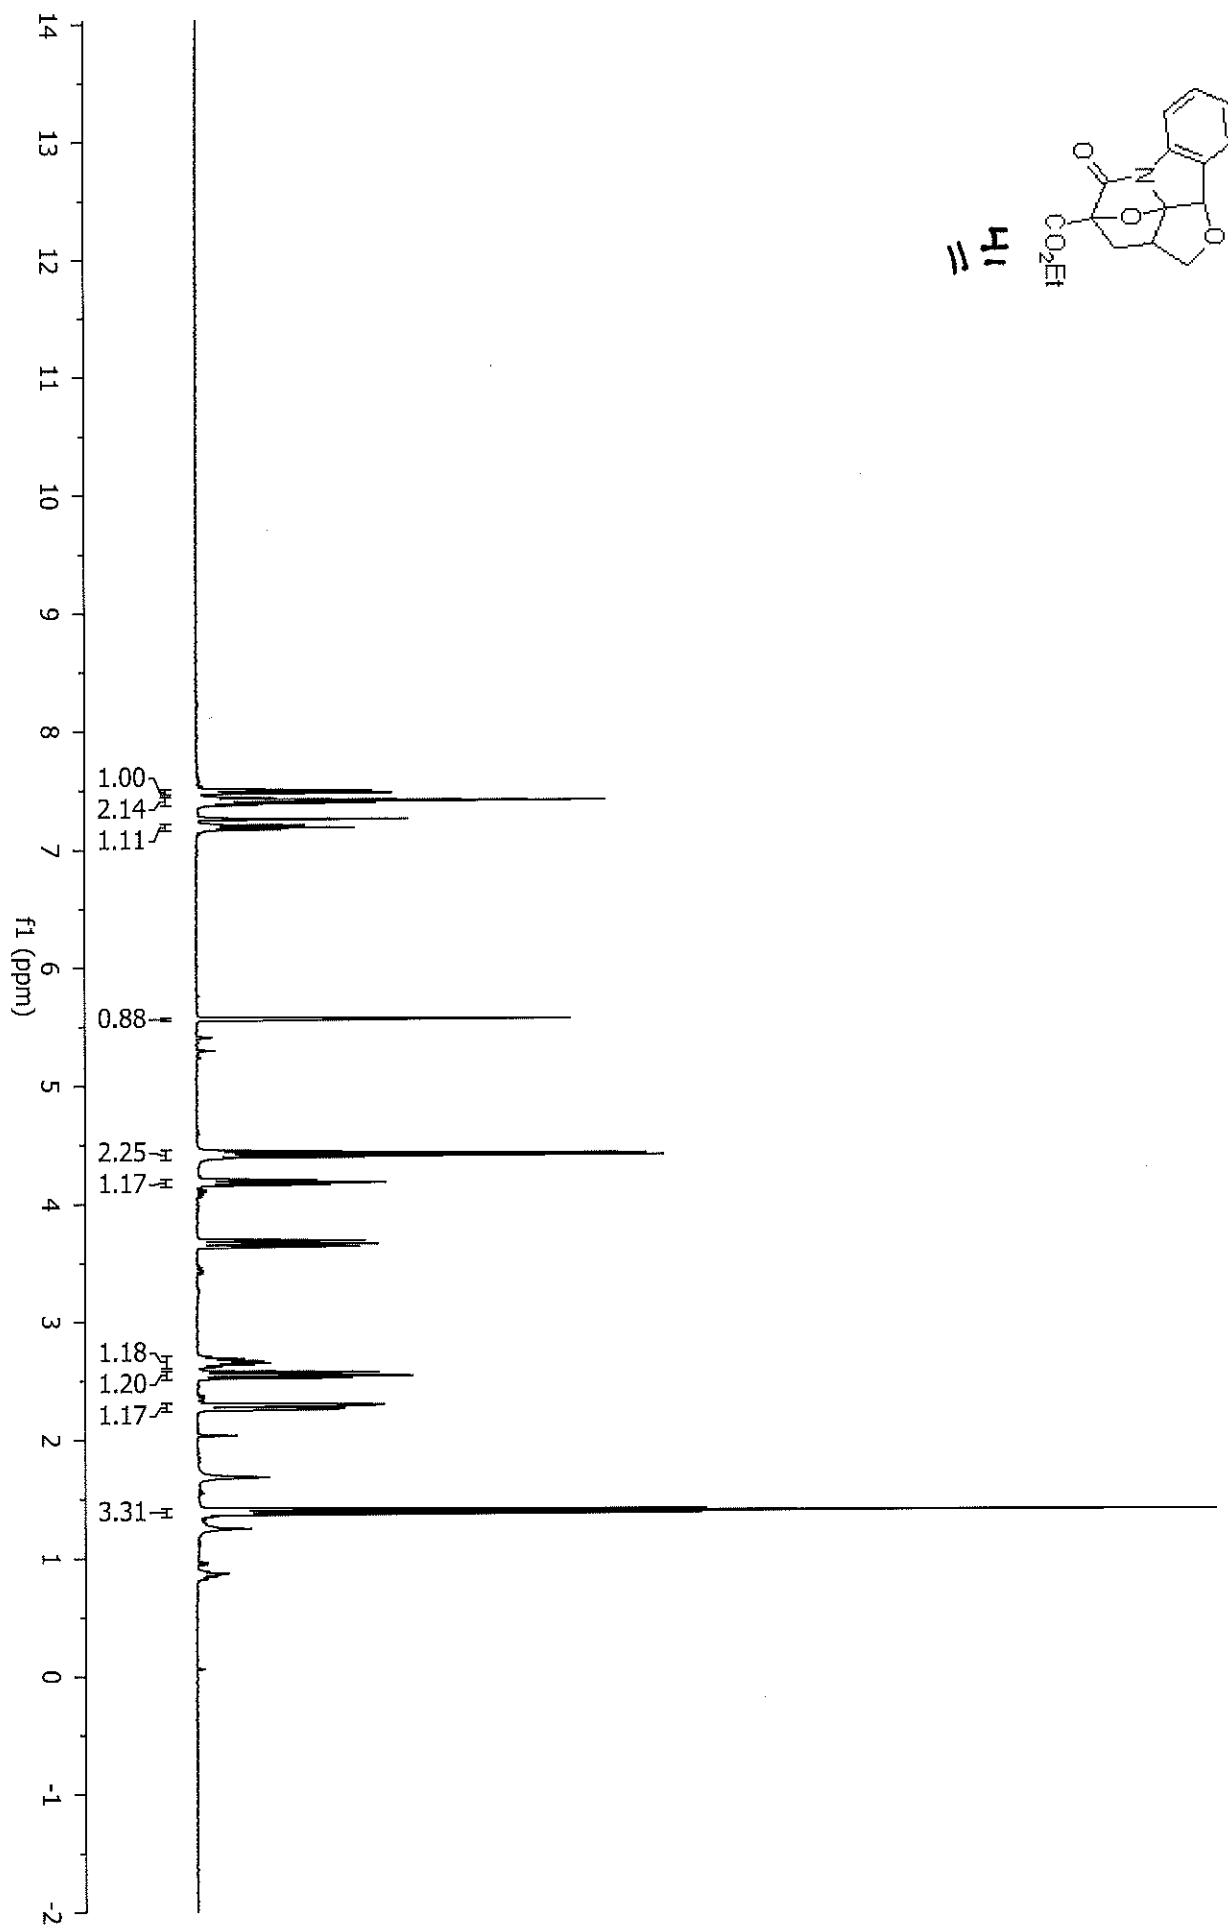

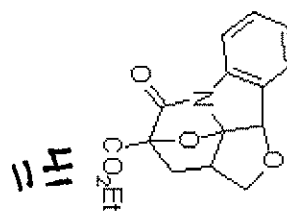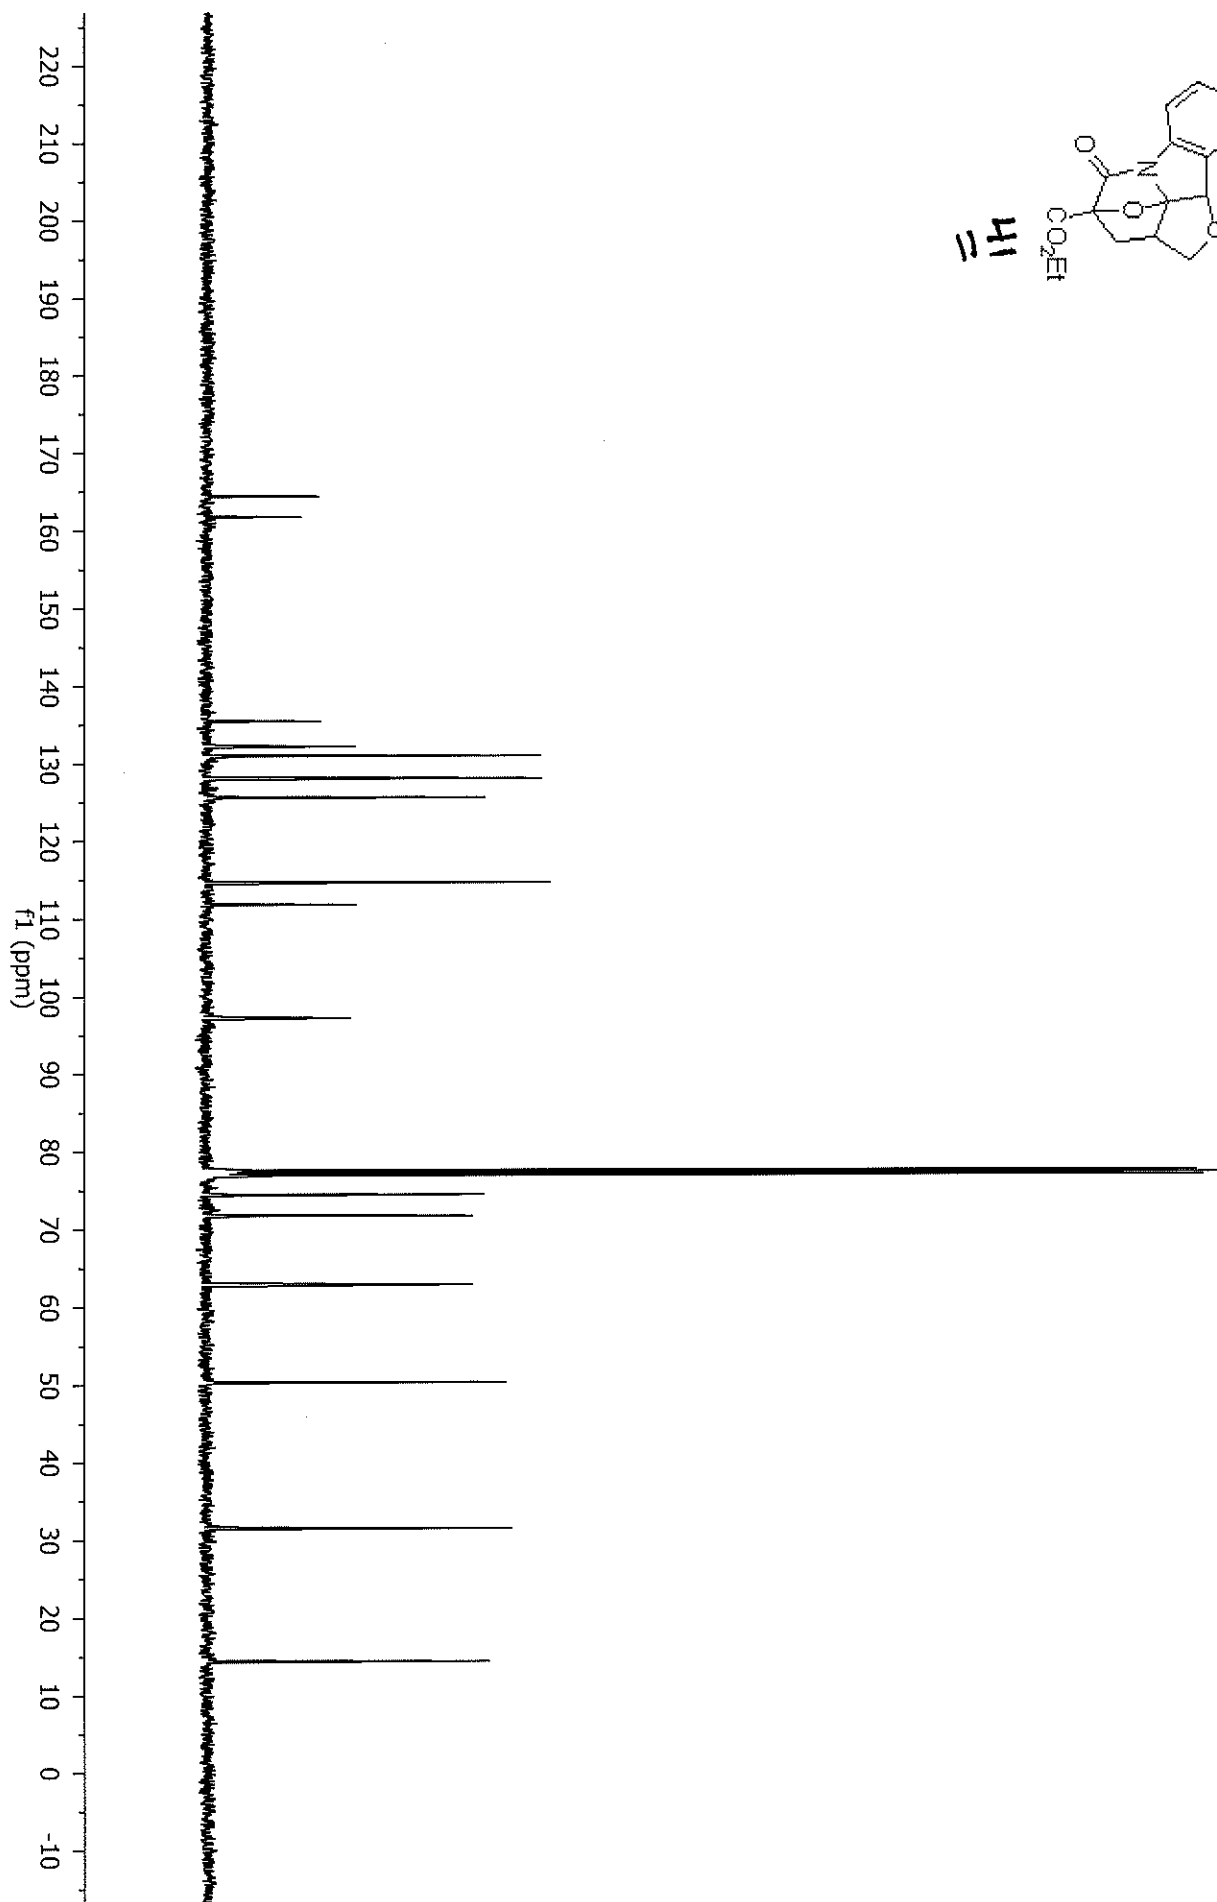

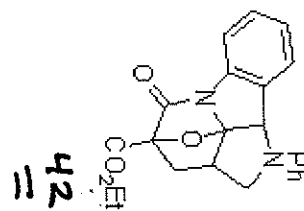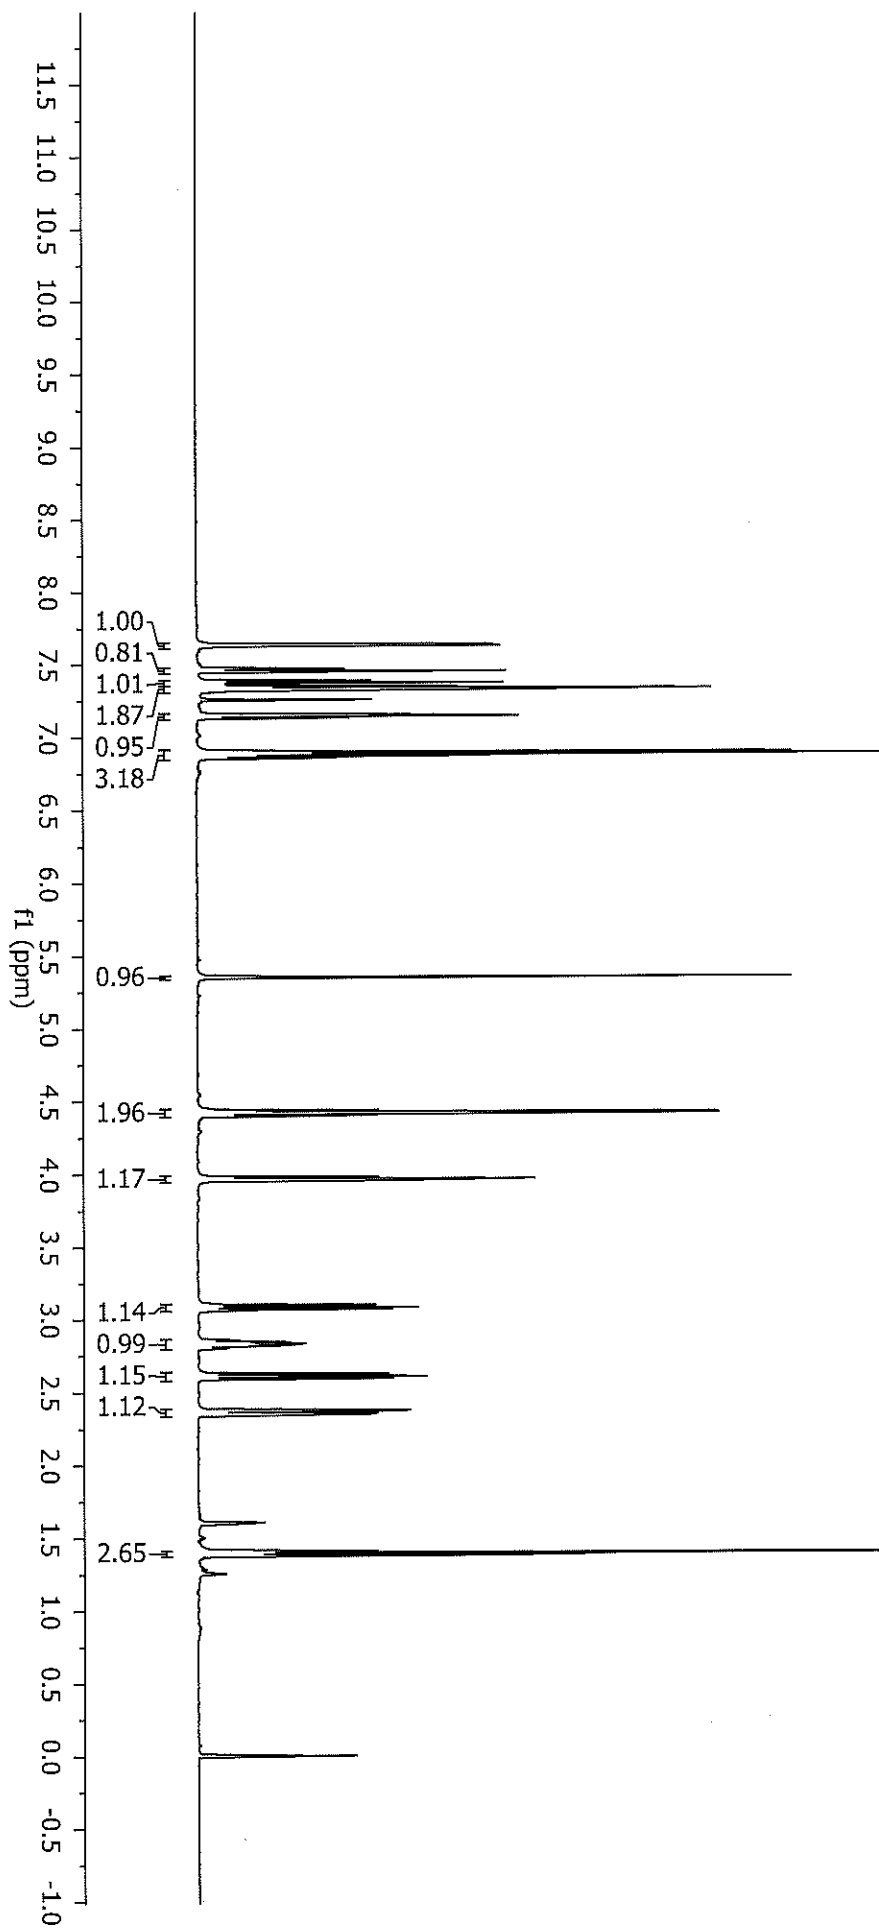

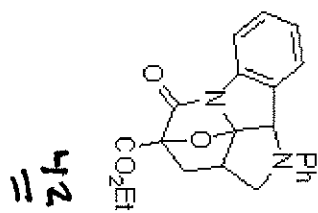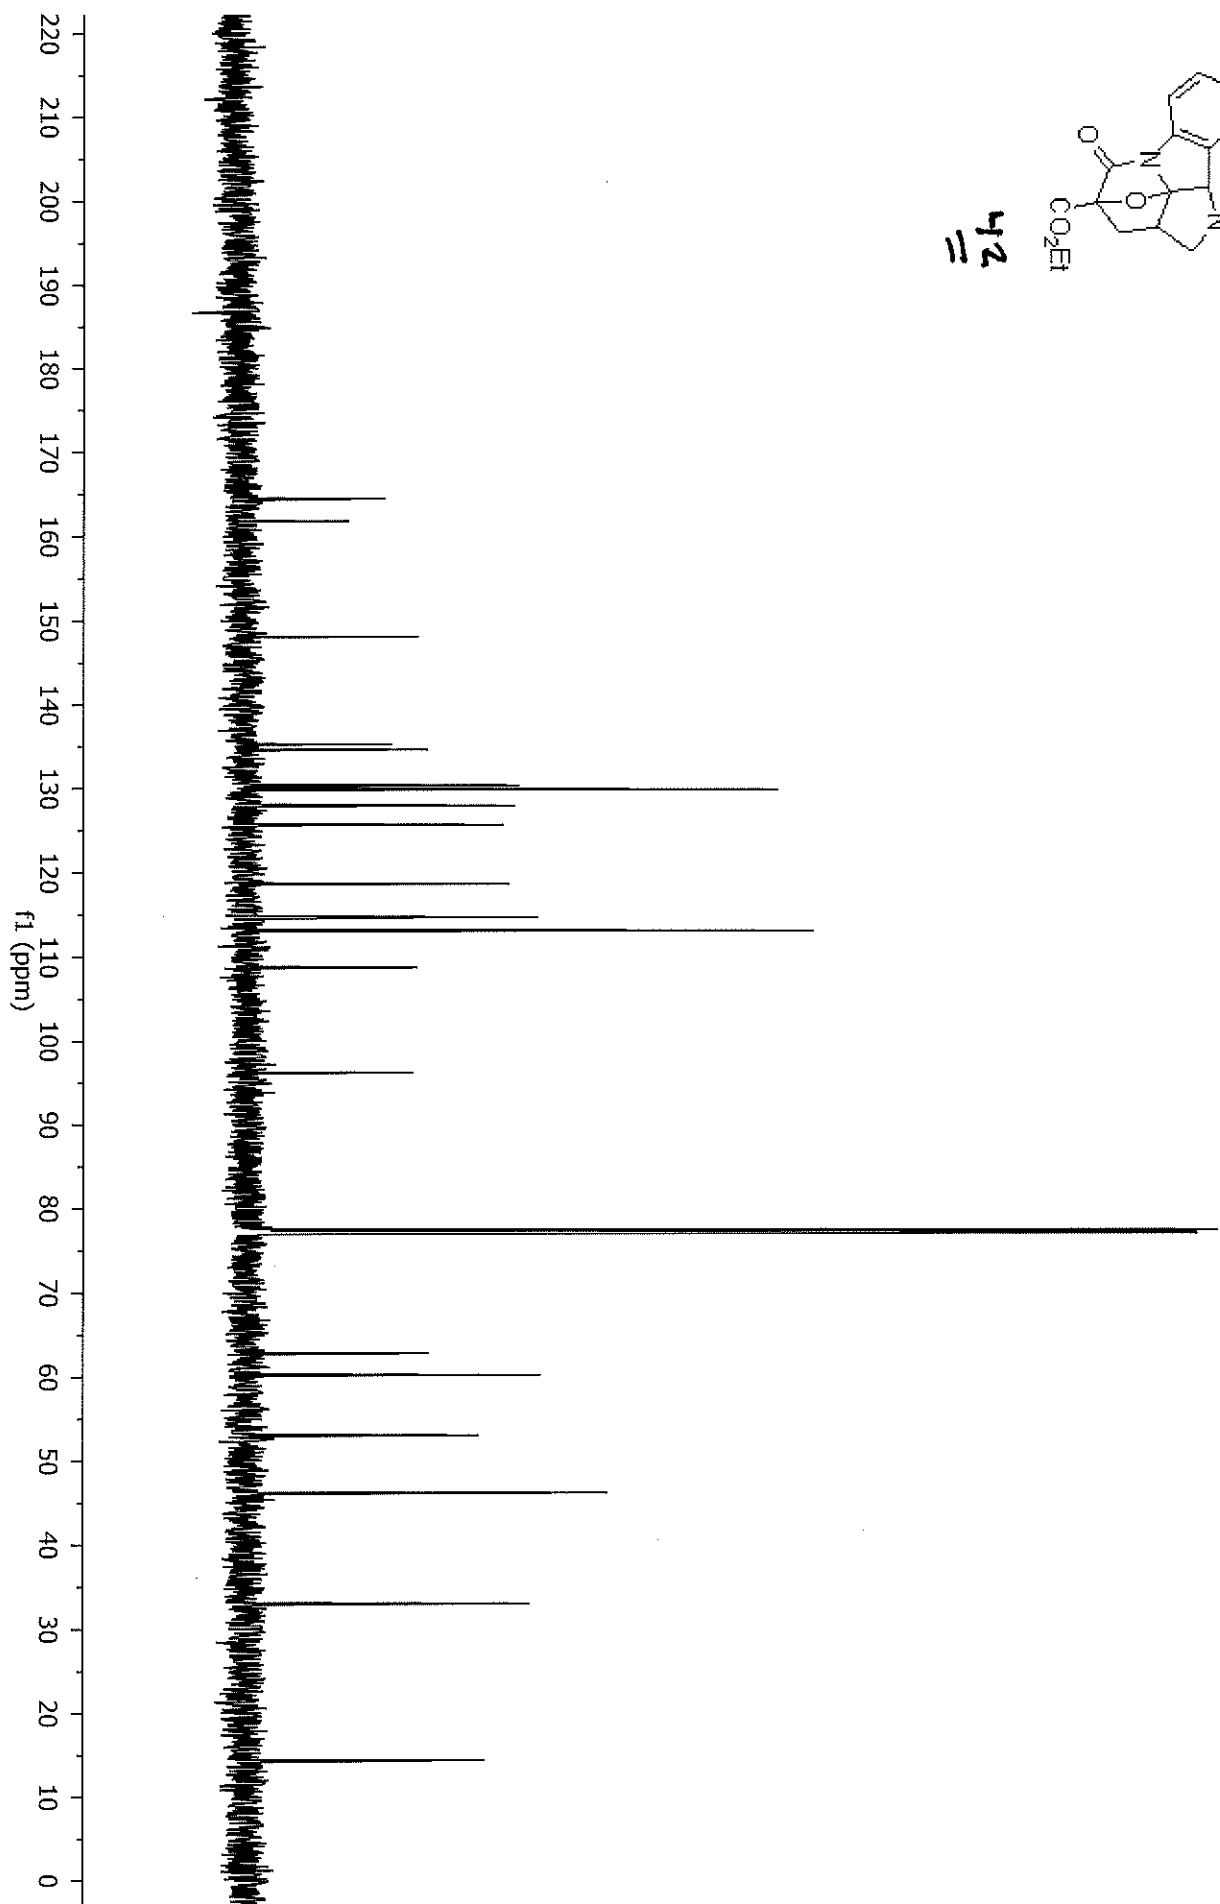

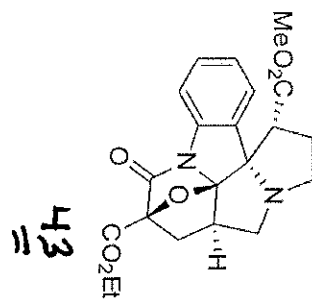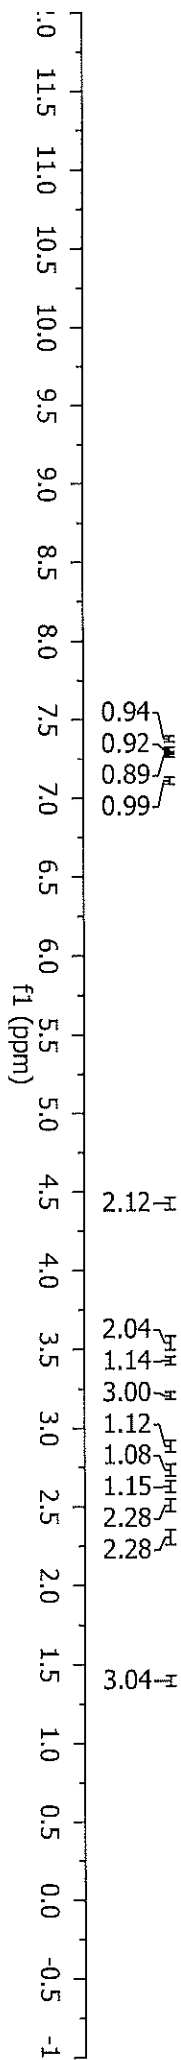

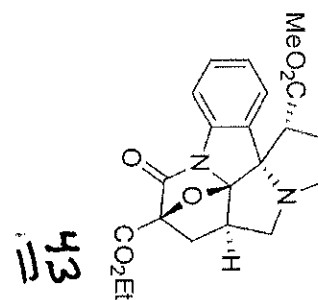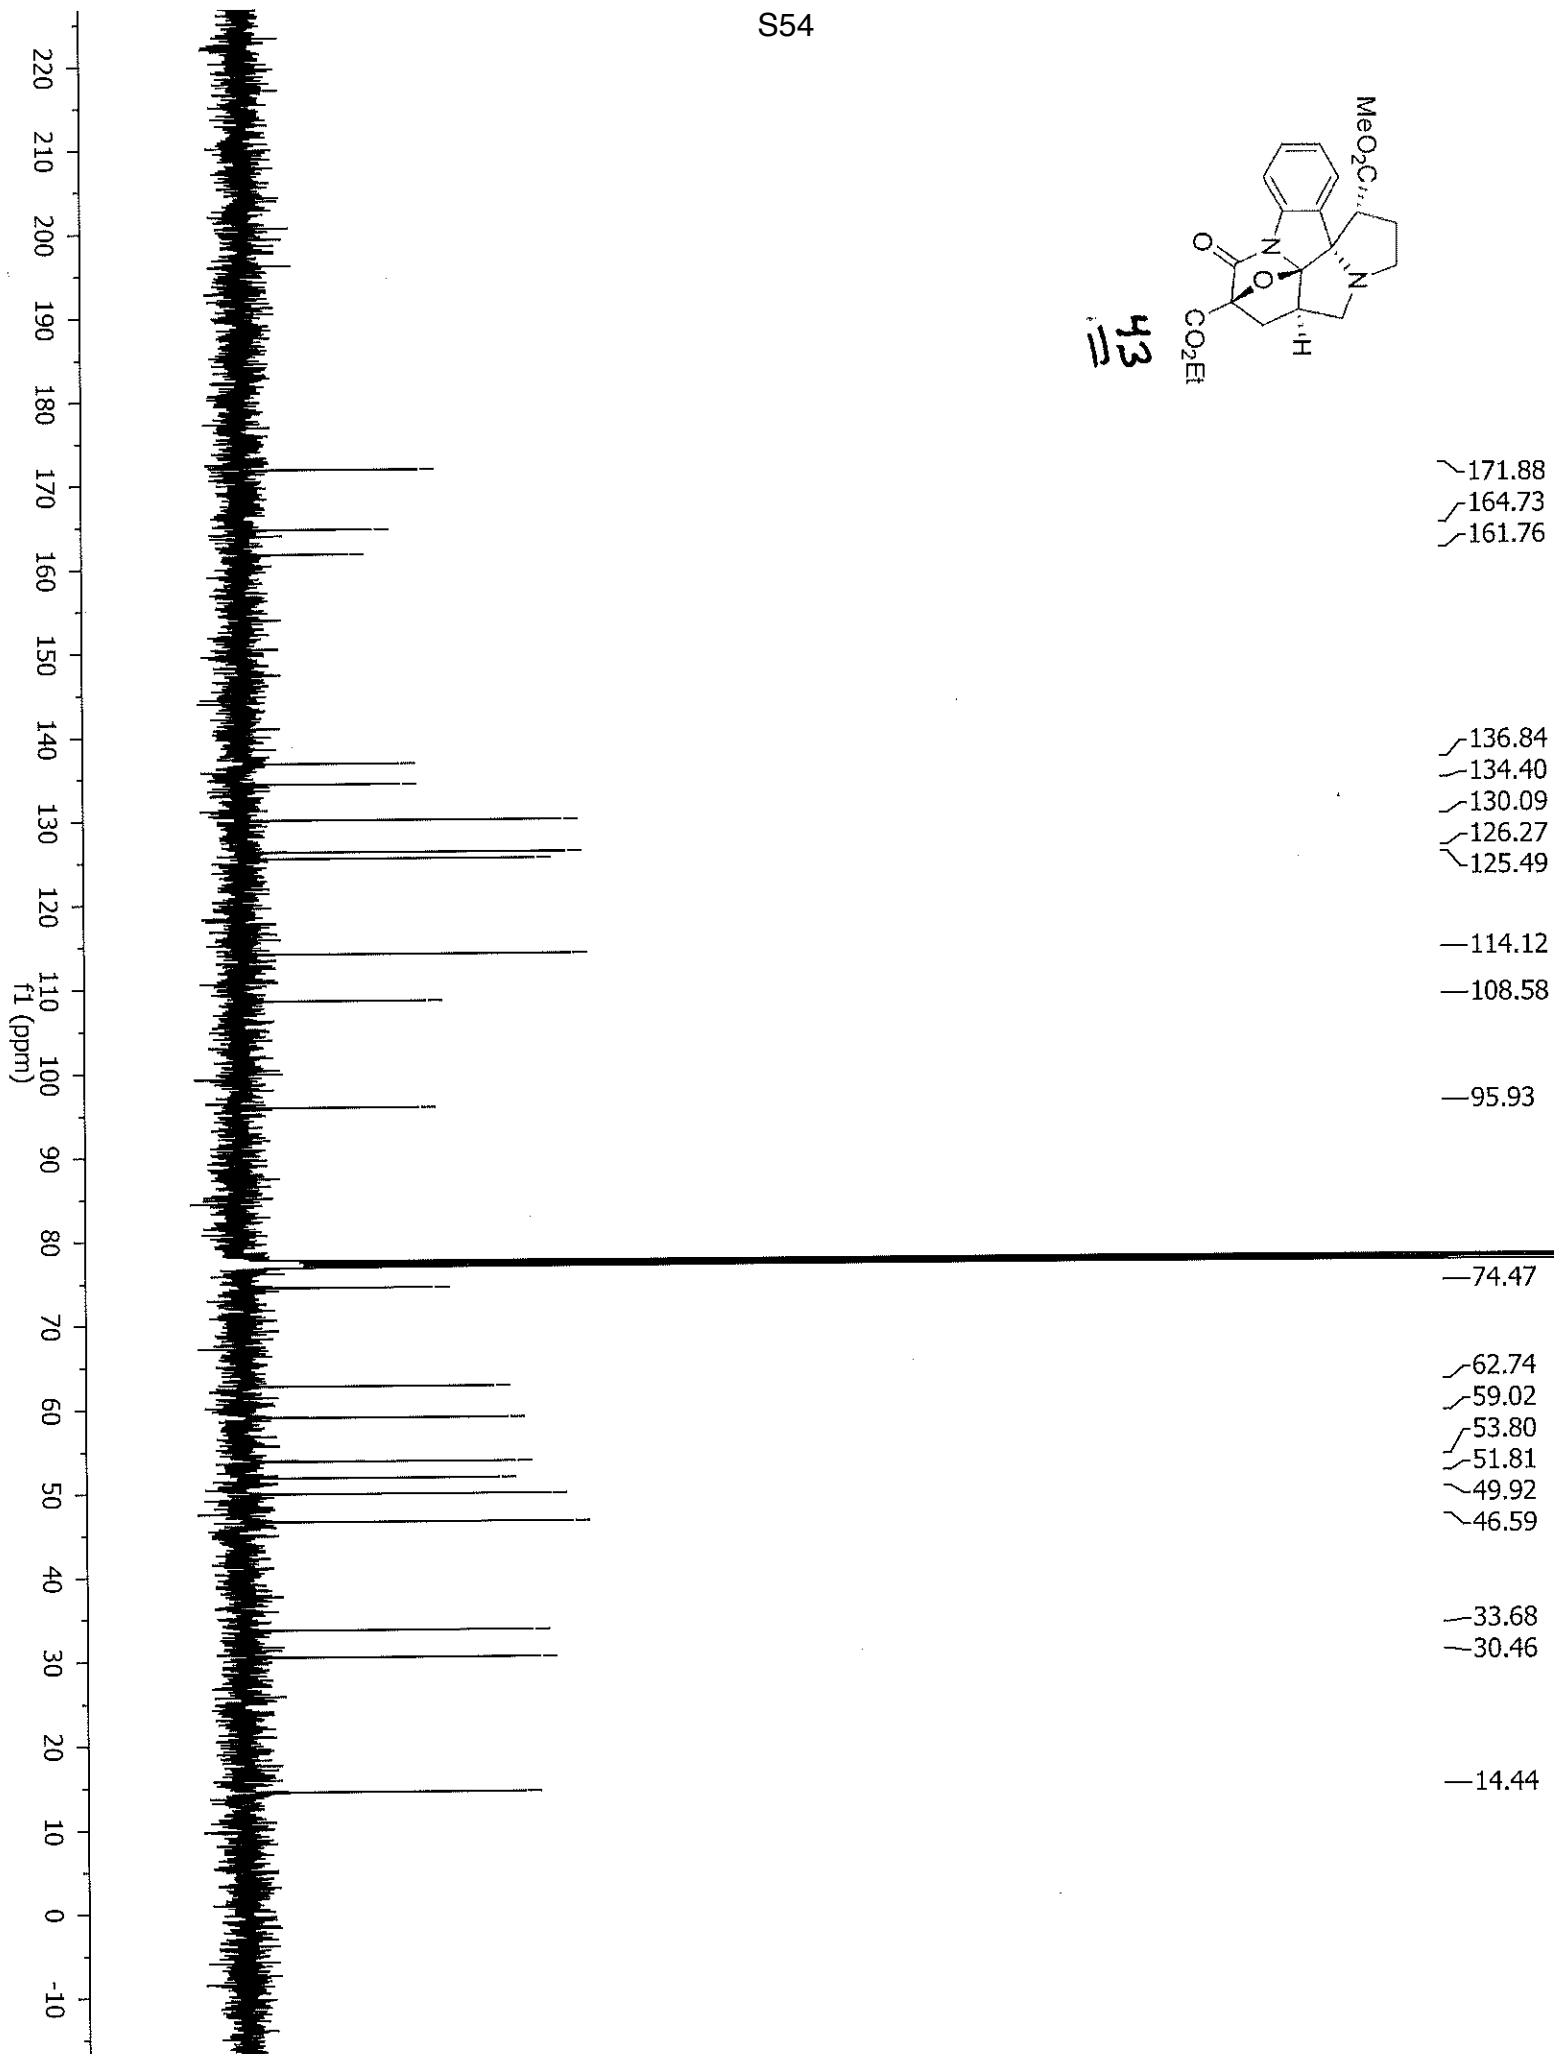

S55

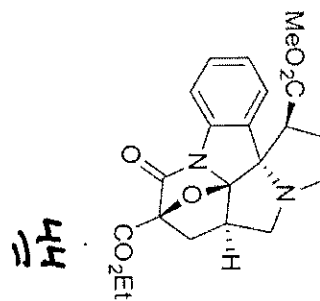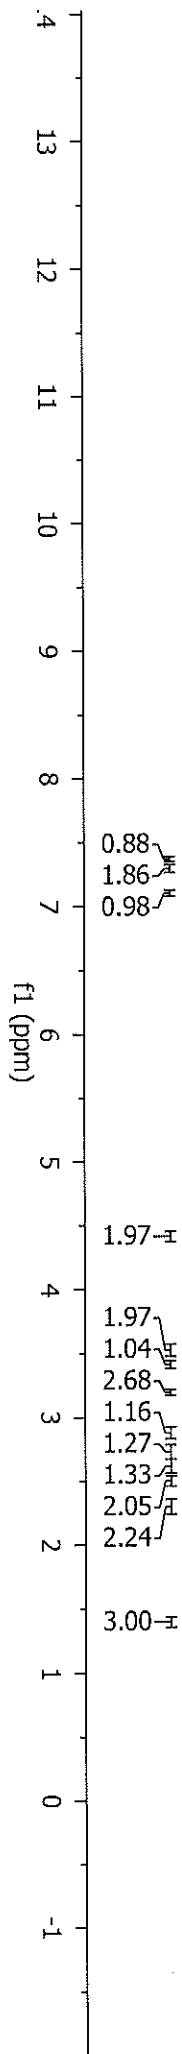

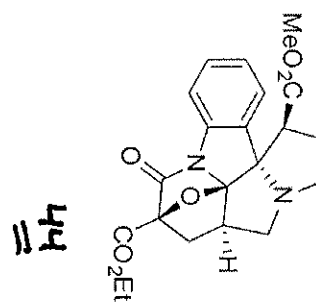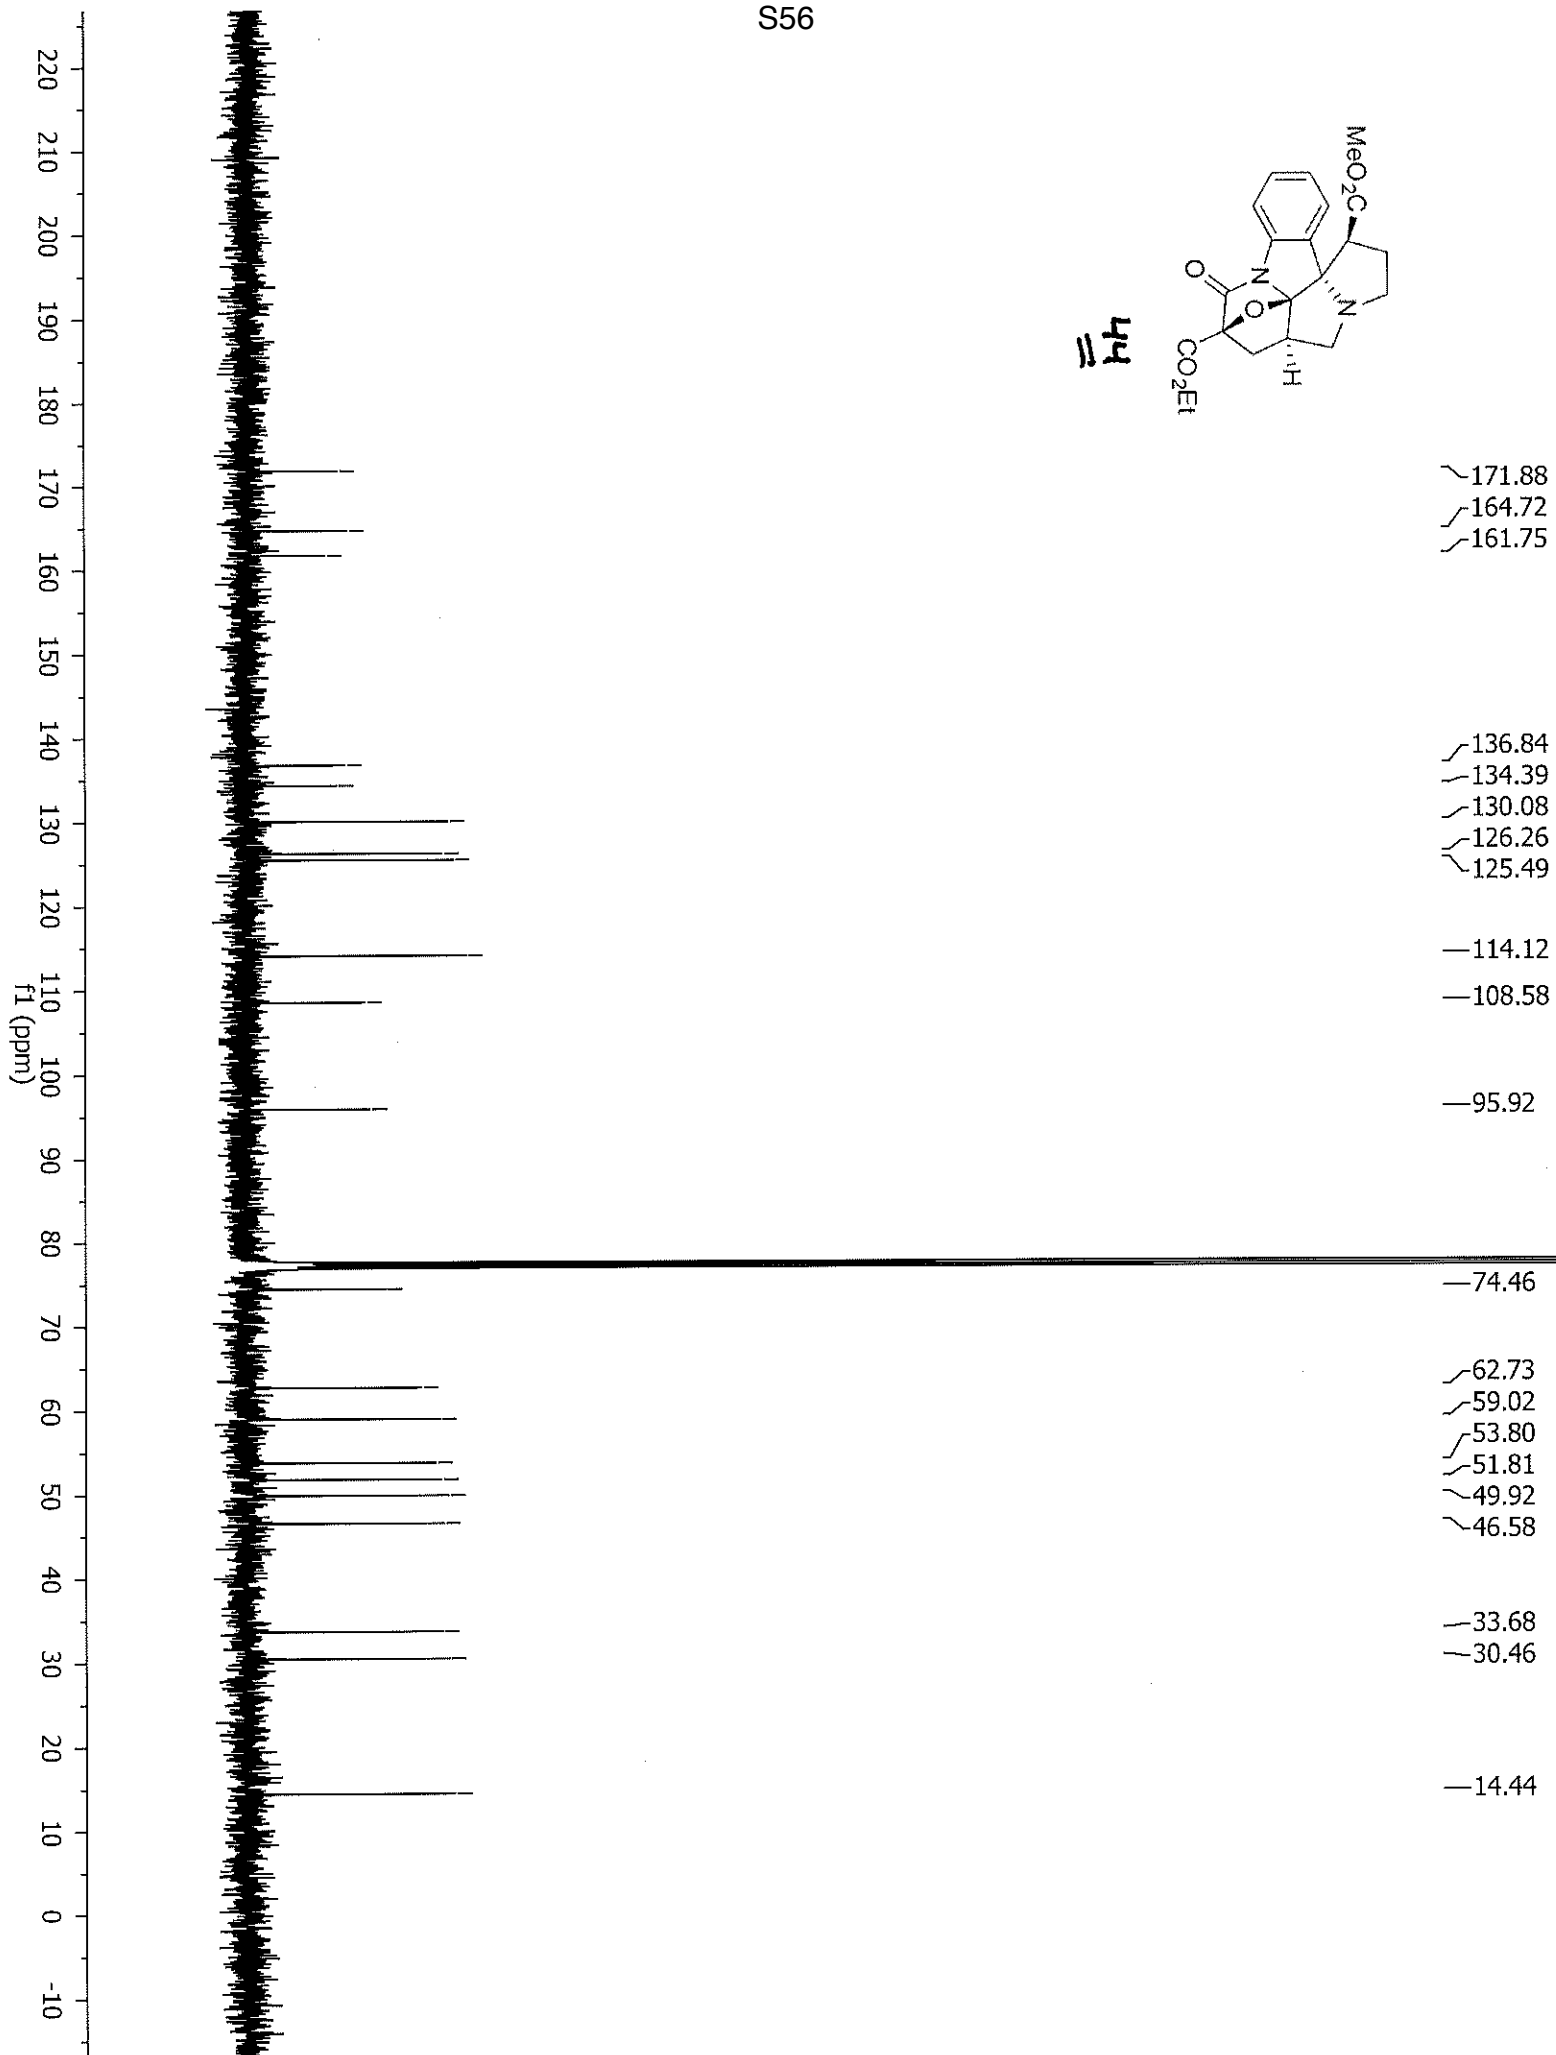



S57

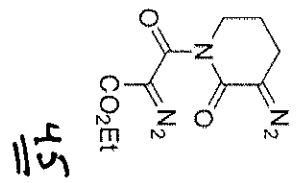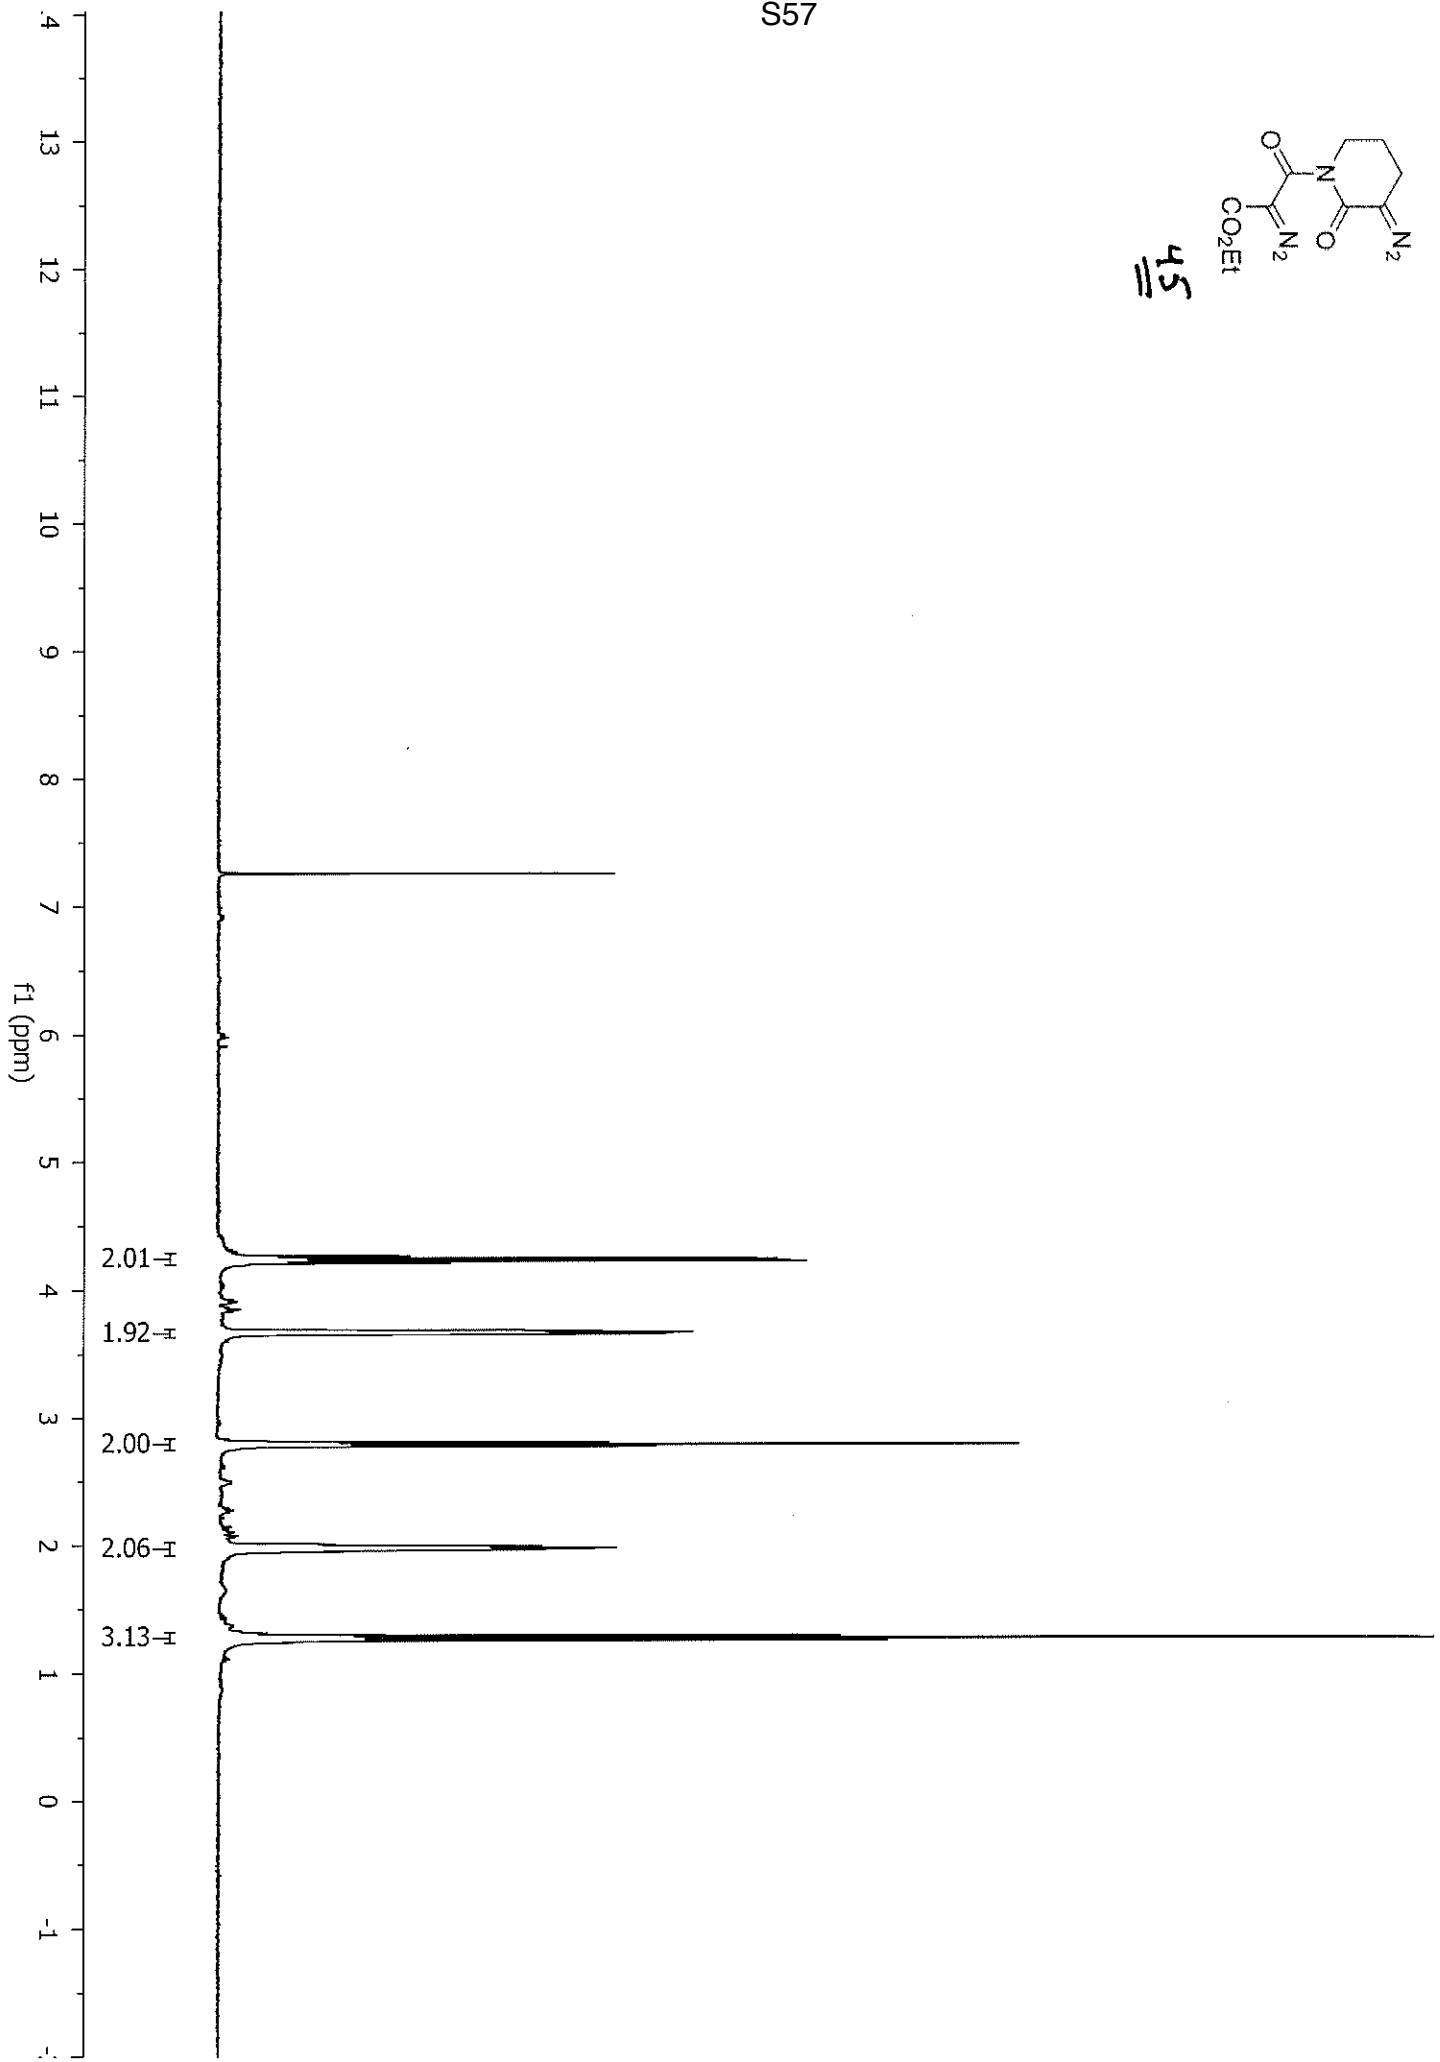

S58

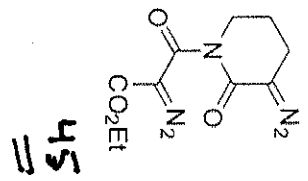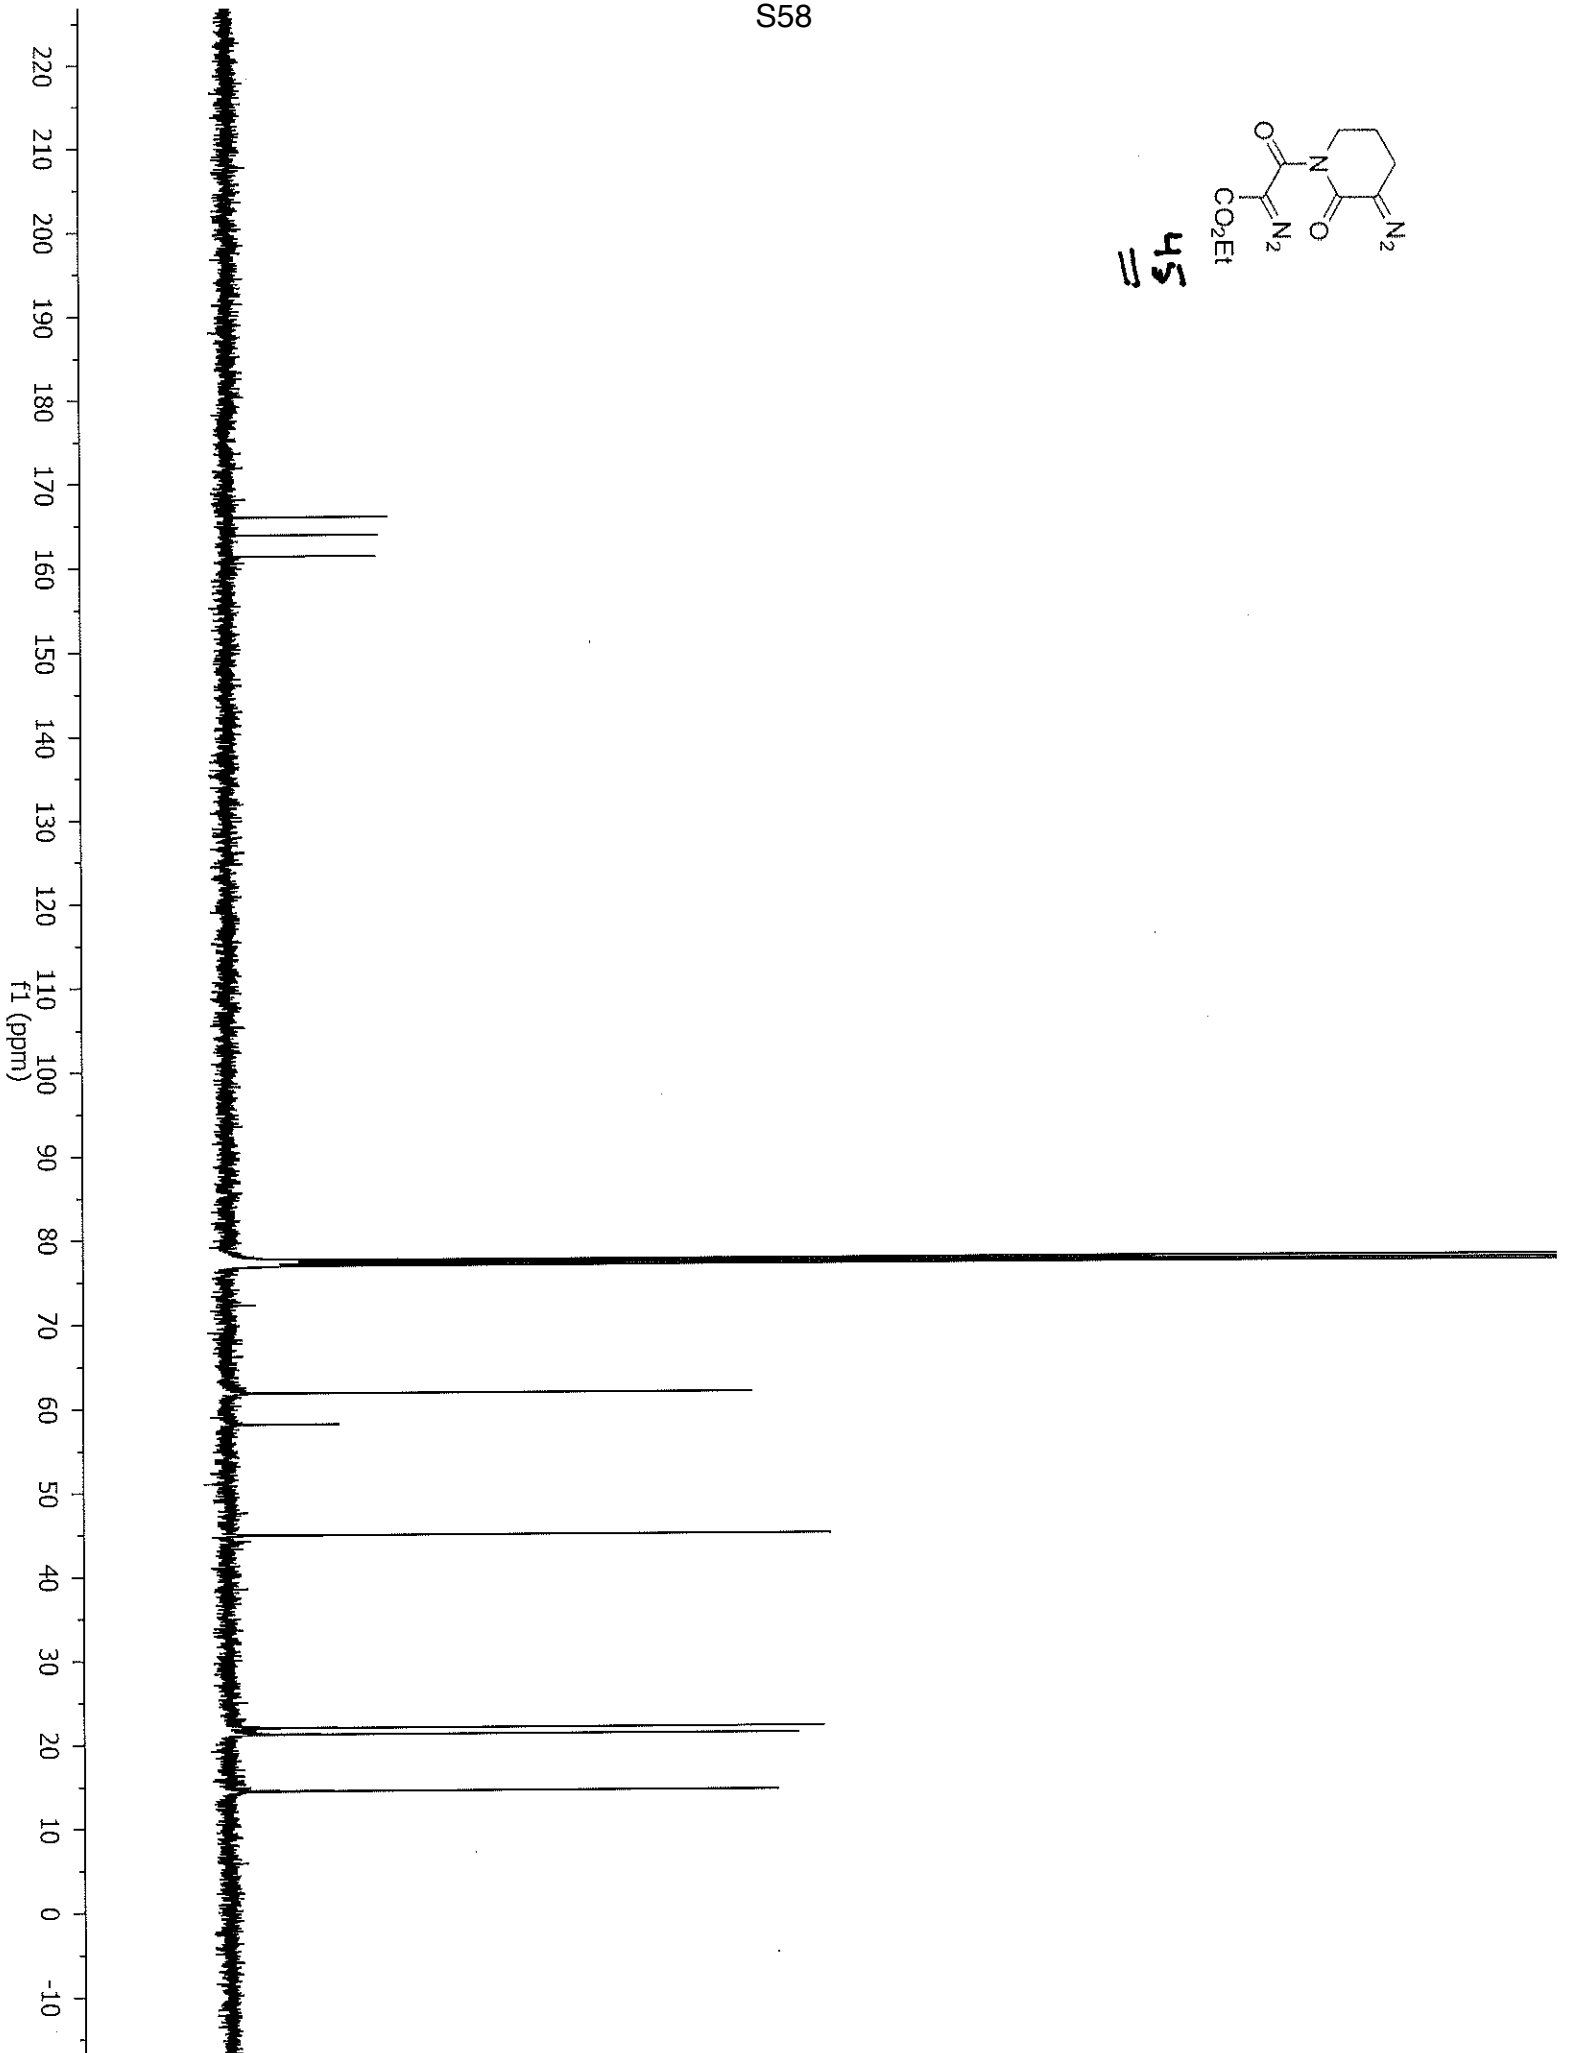

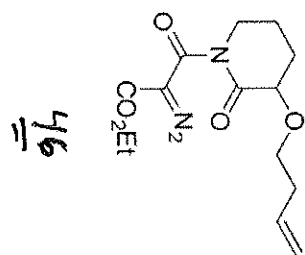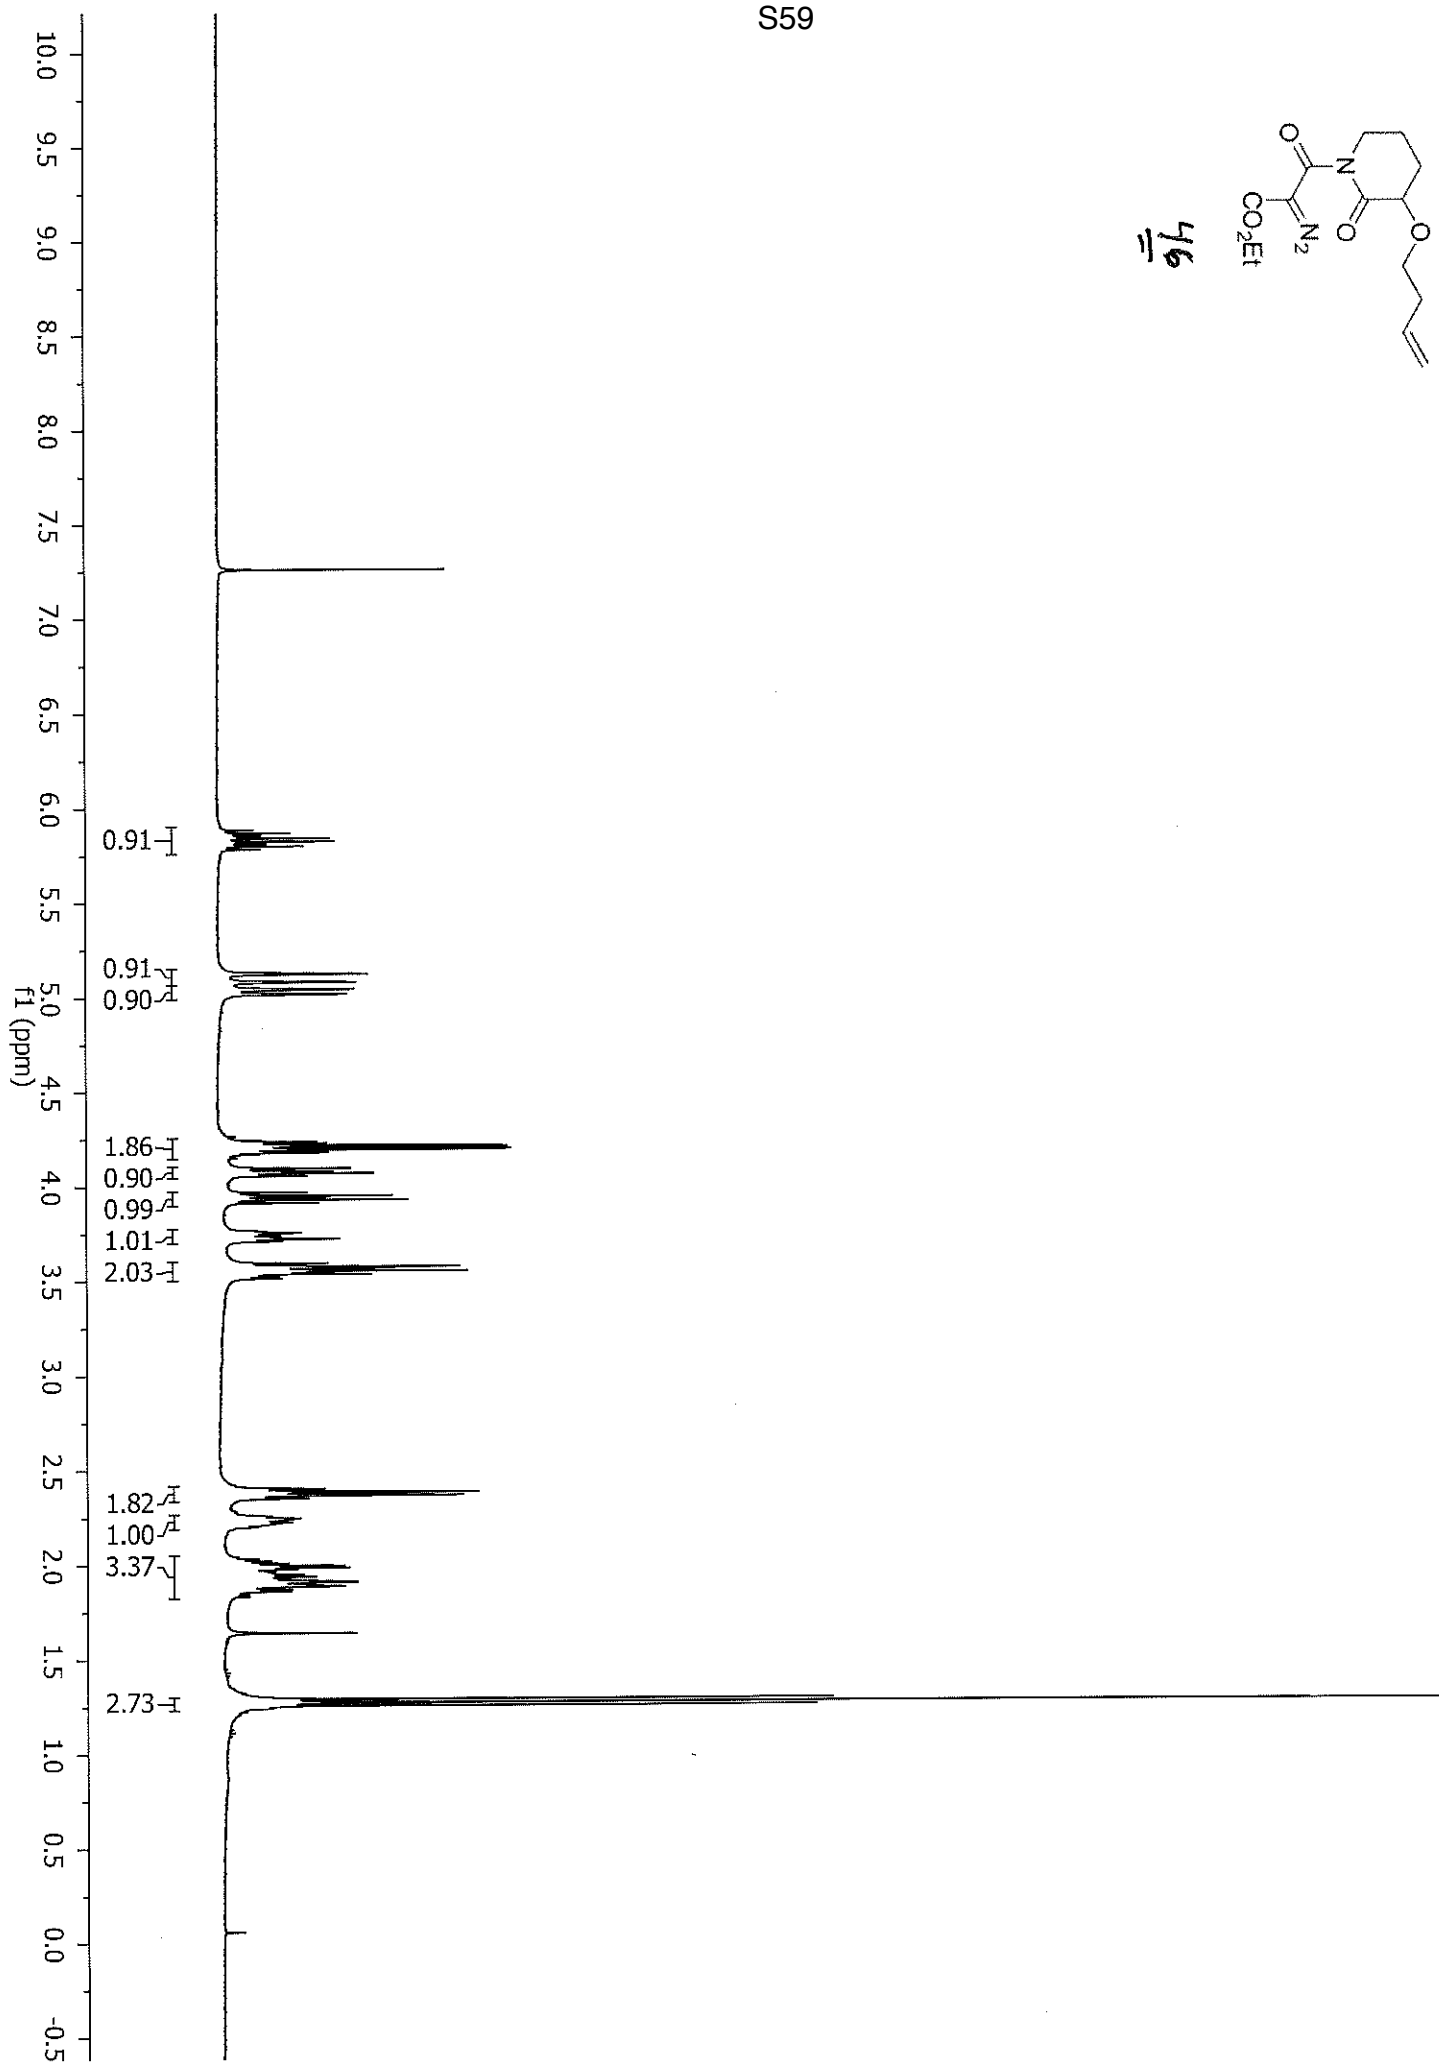

S60

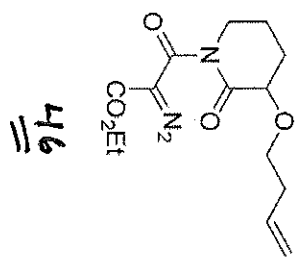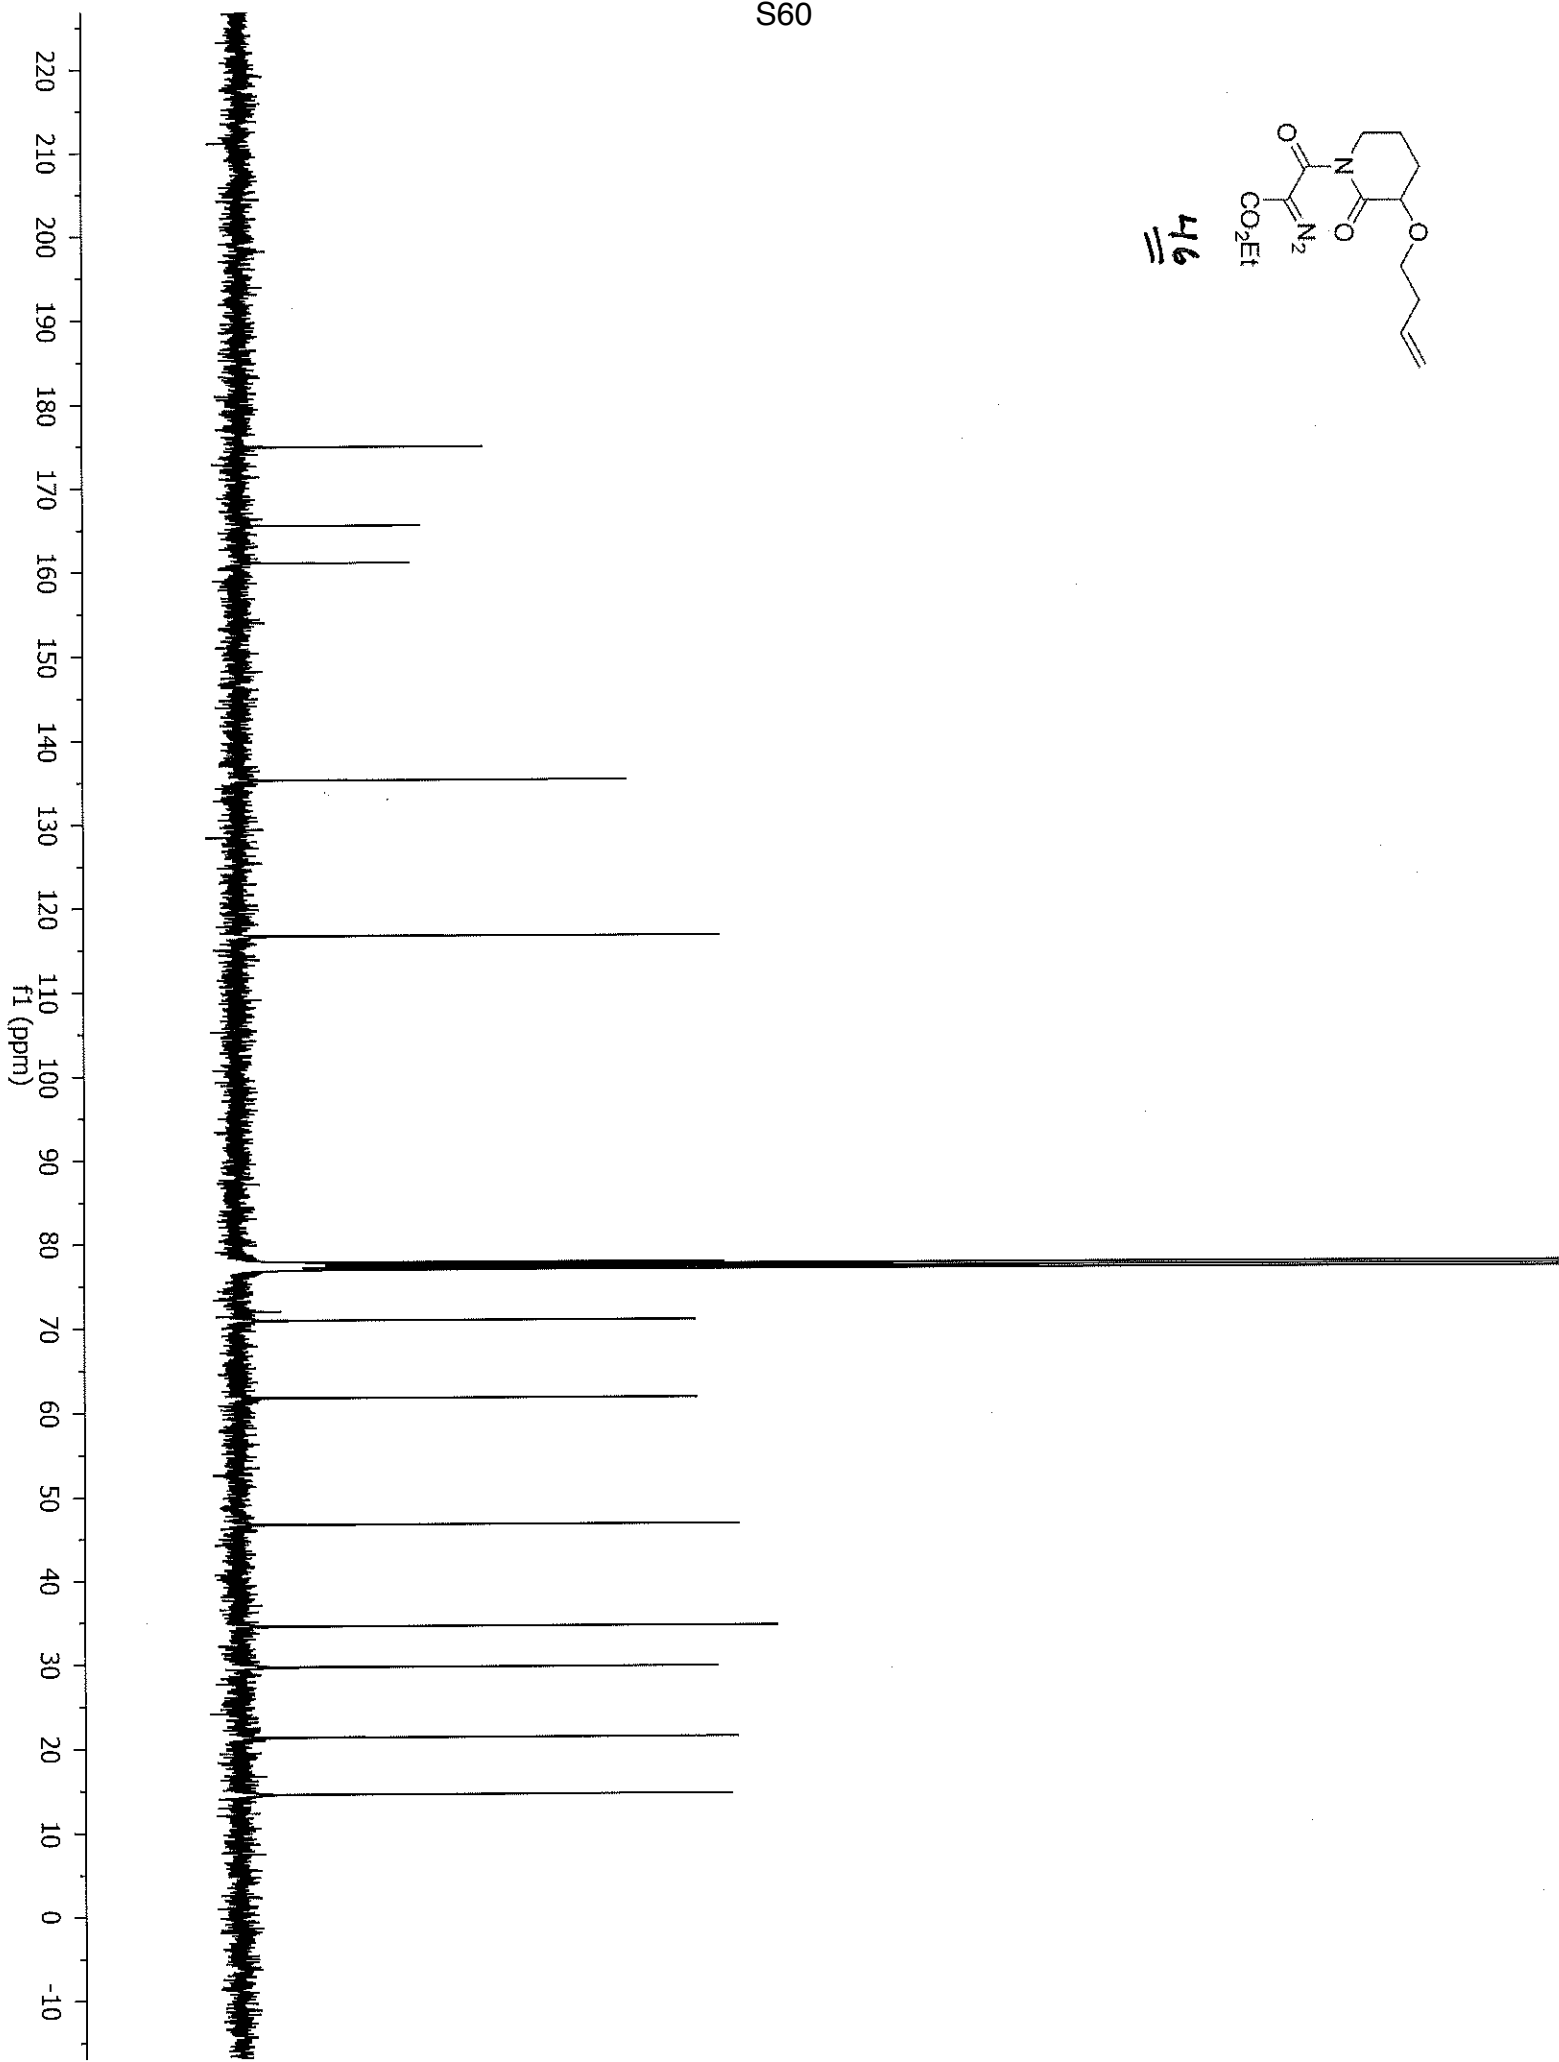

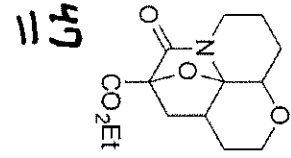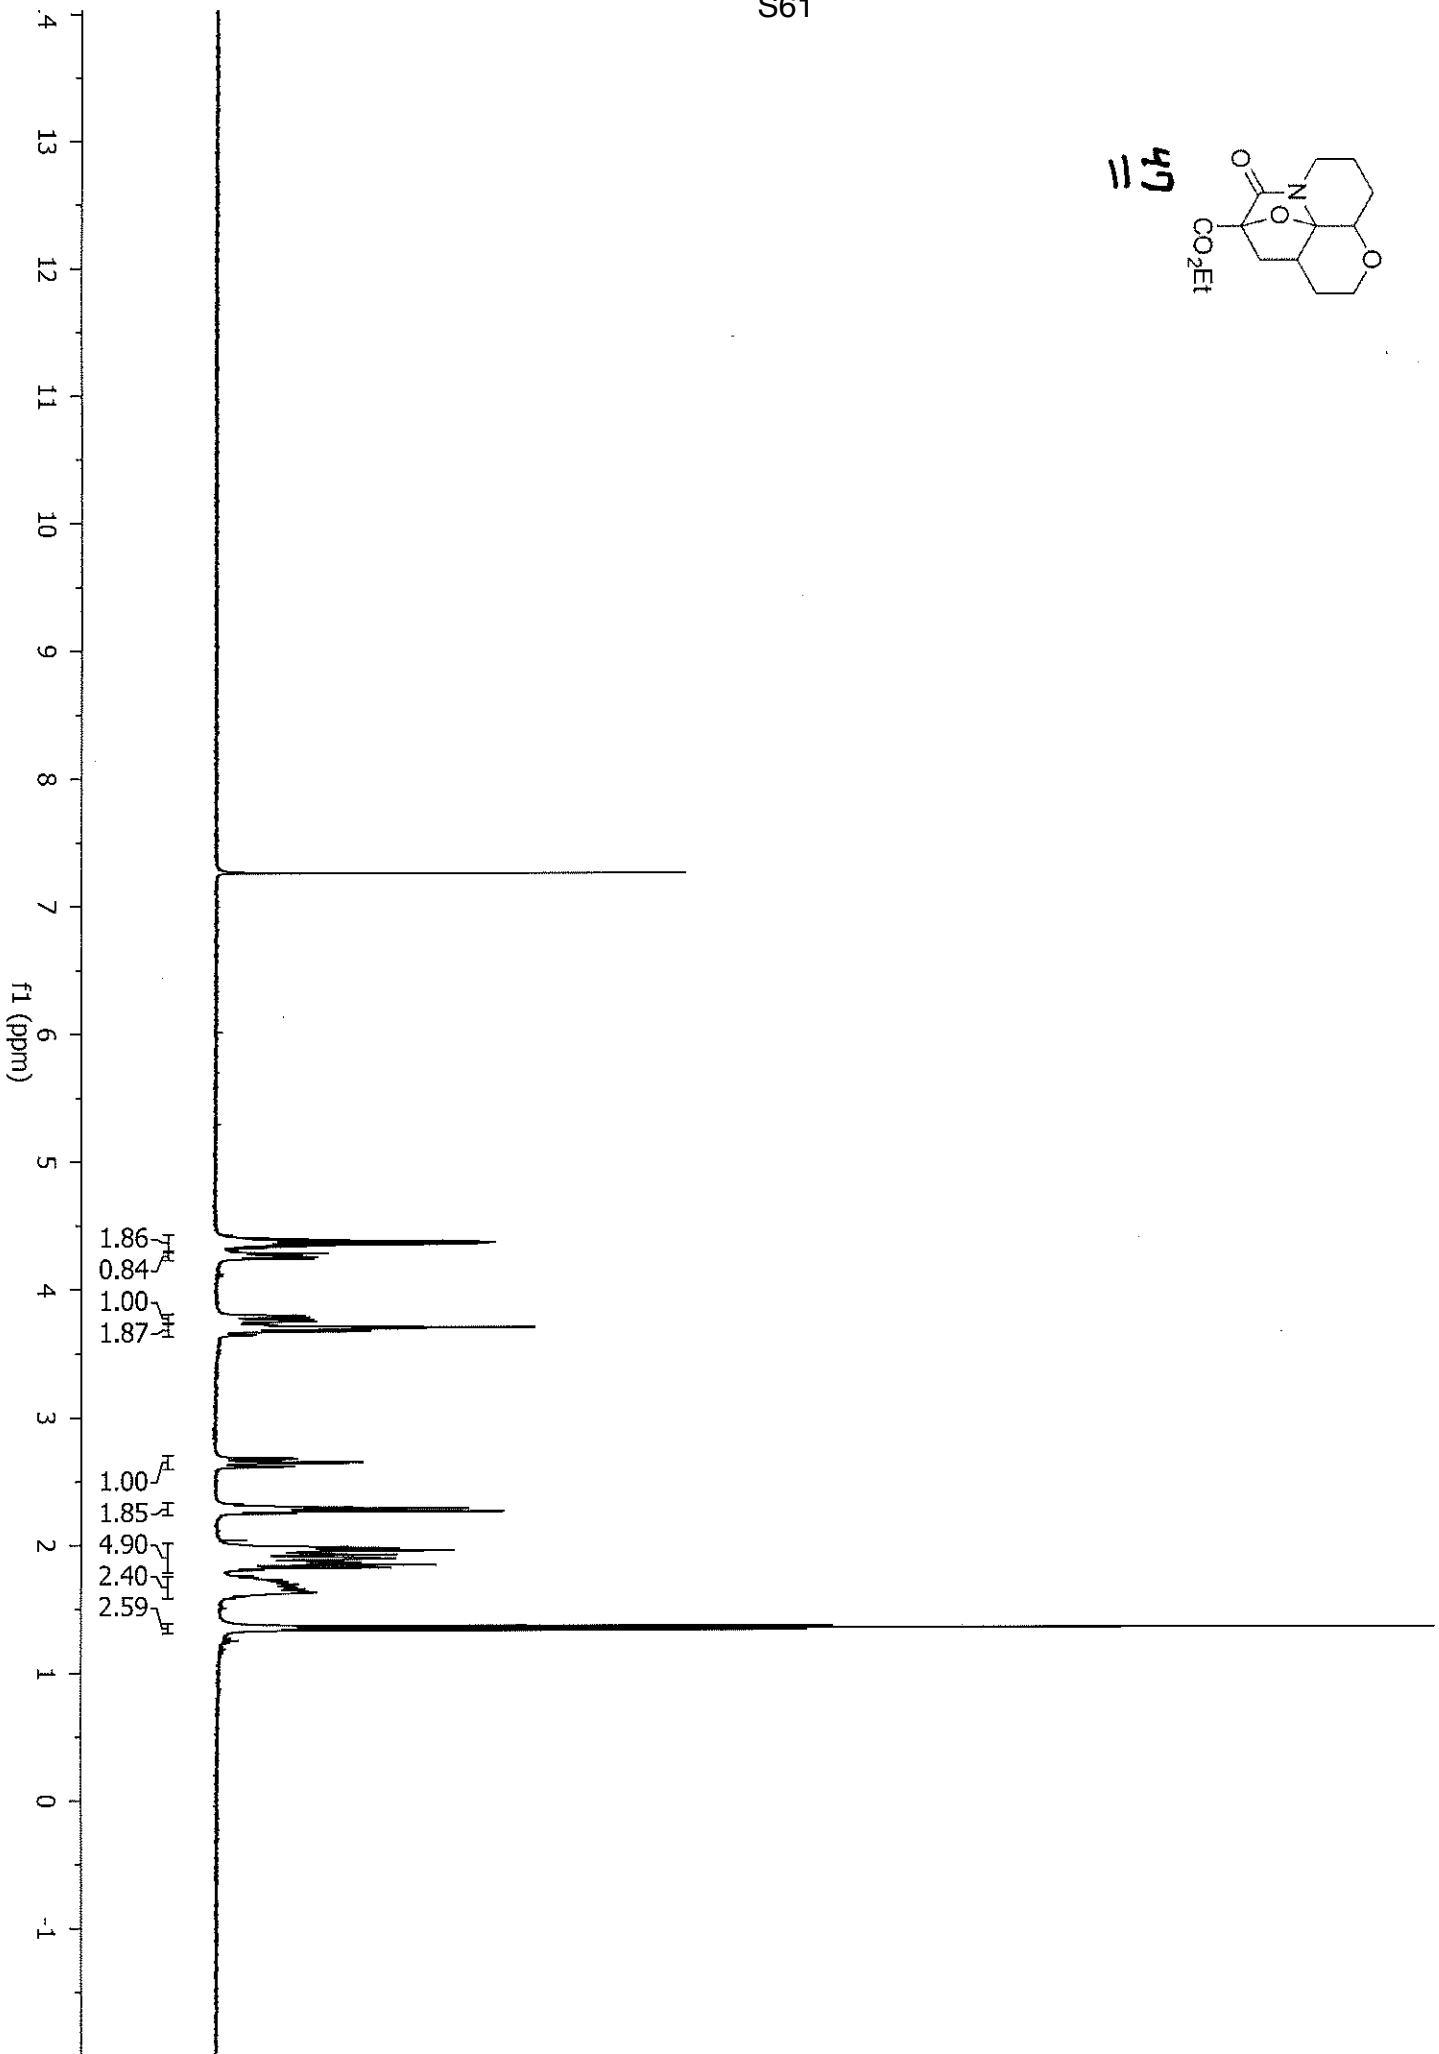

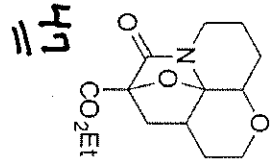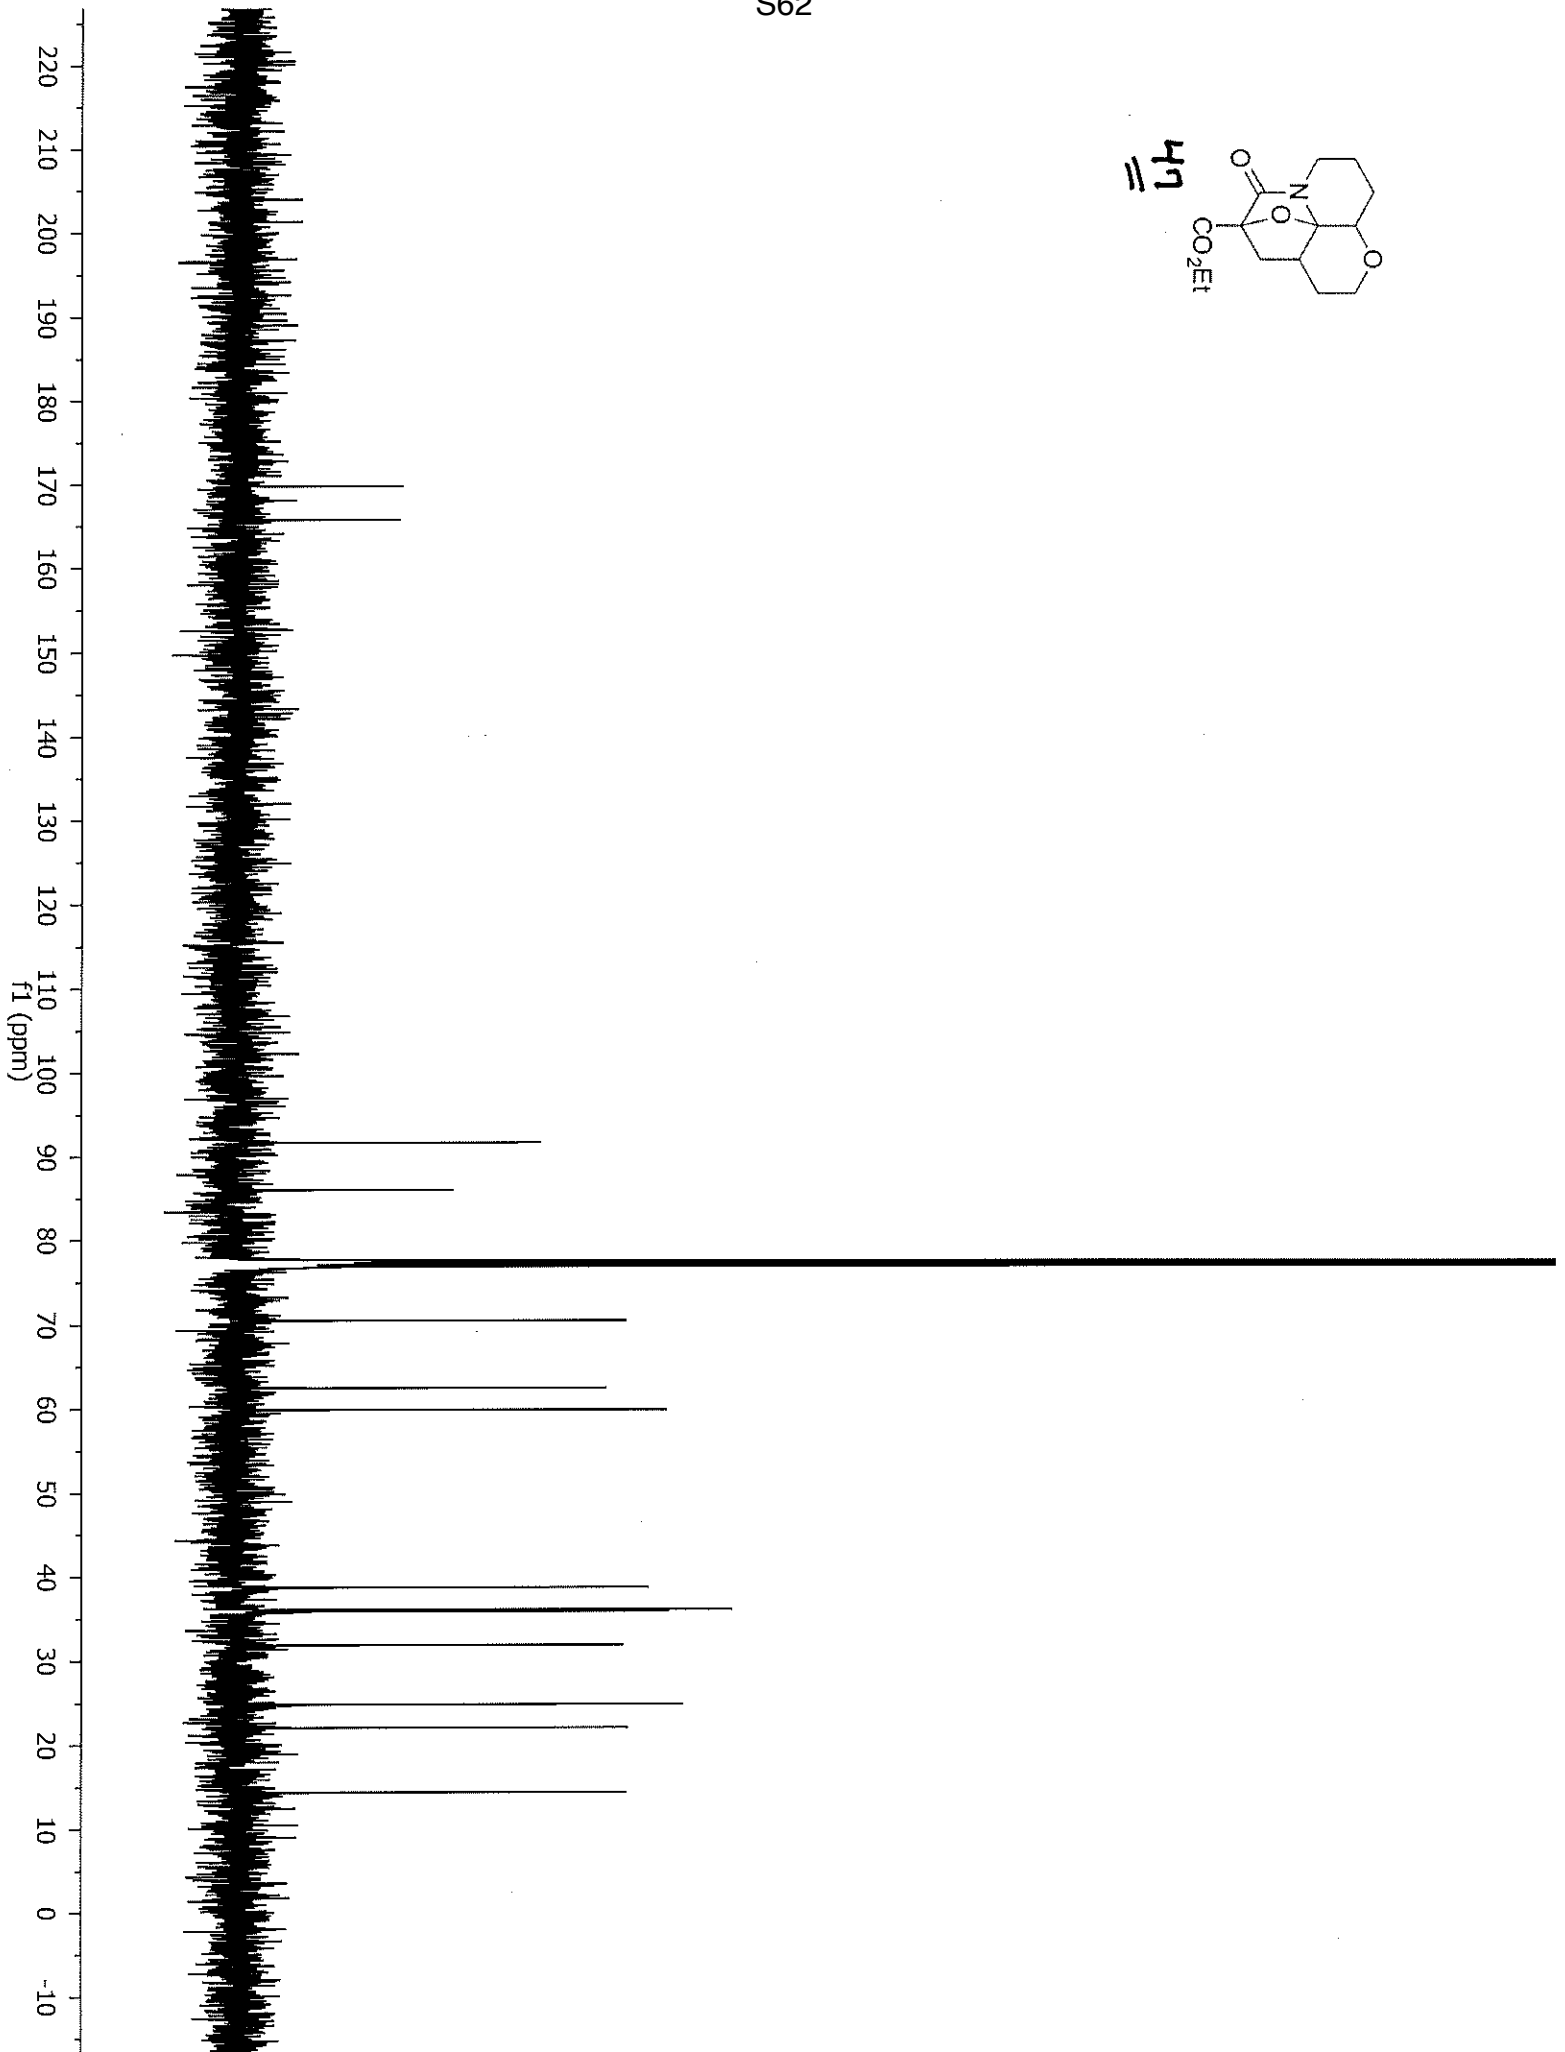

Thermal ellipsoid plot for compound **37**

The ellipsoid contour percent probability level = 50%

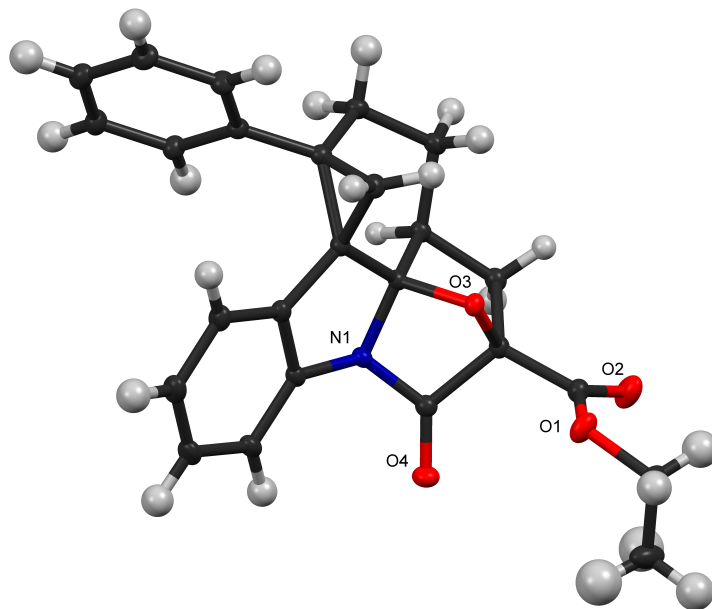

Thermal ellipsoid plot for compound **44**

The ellipsoid contour percent probability level = 50%

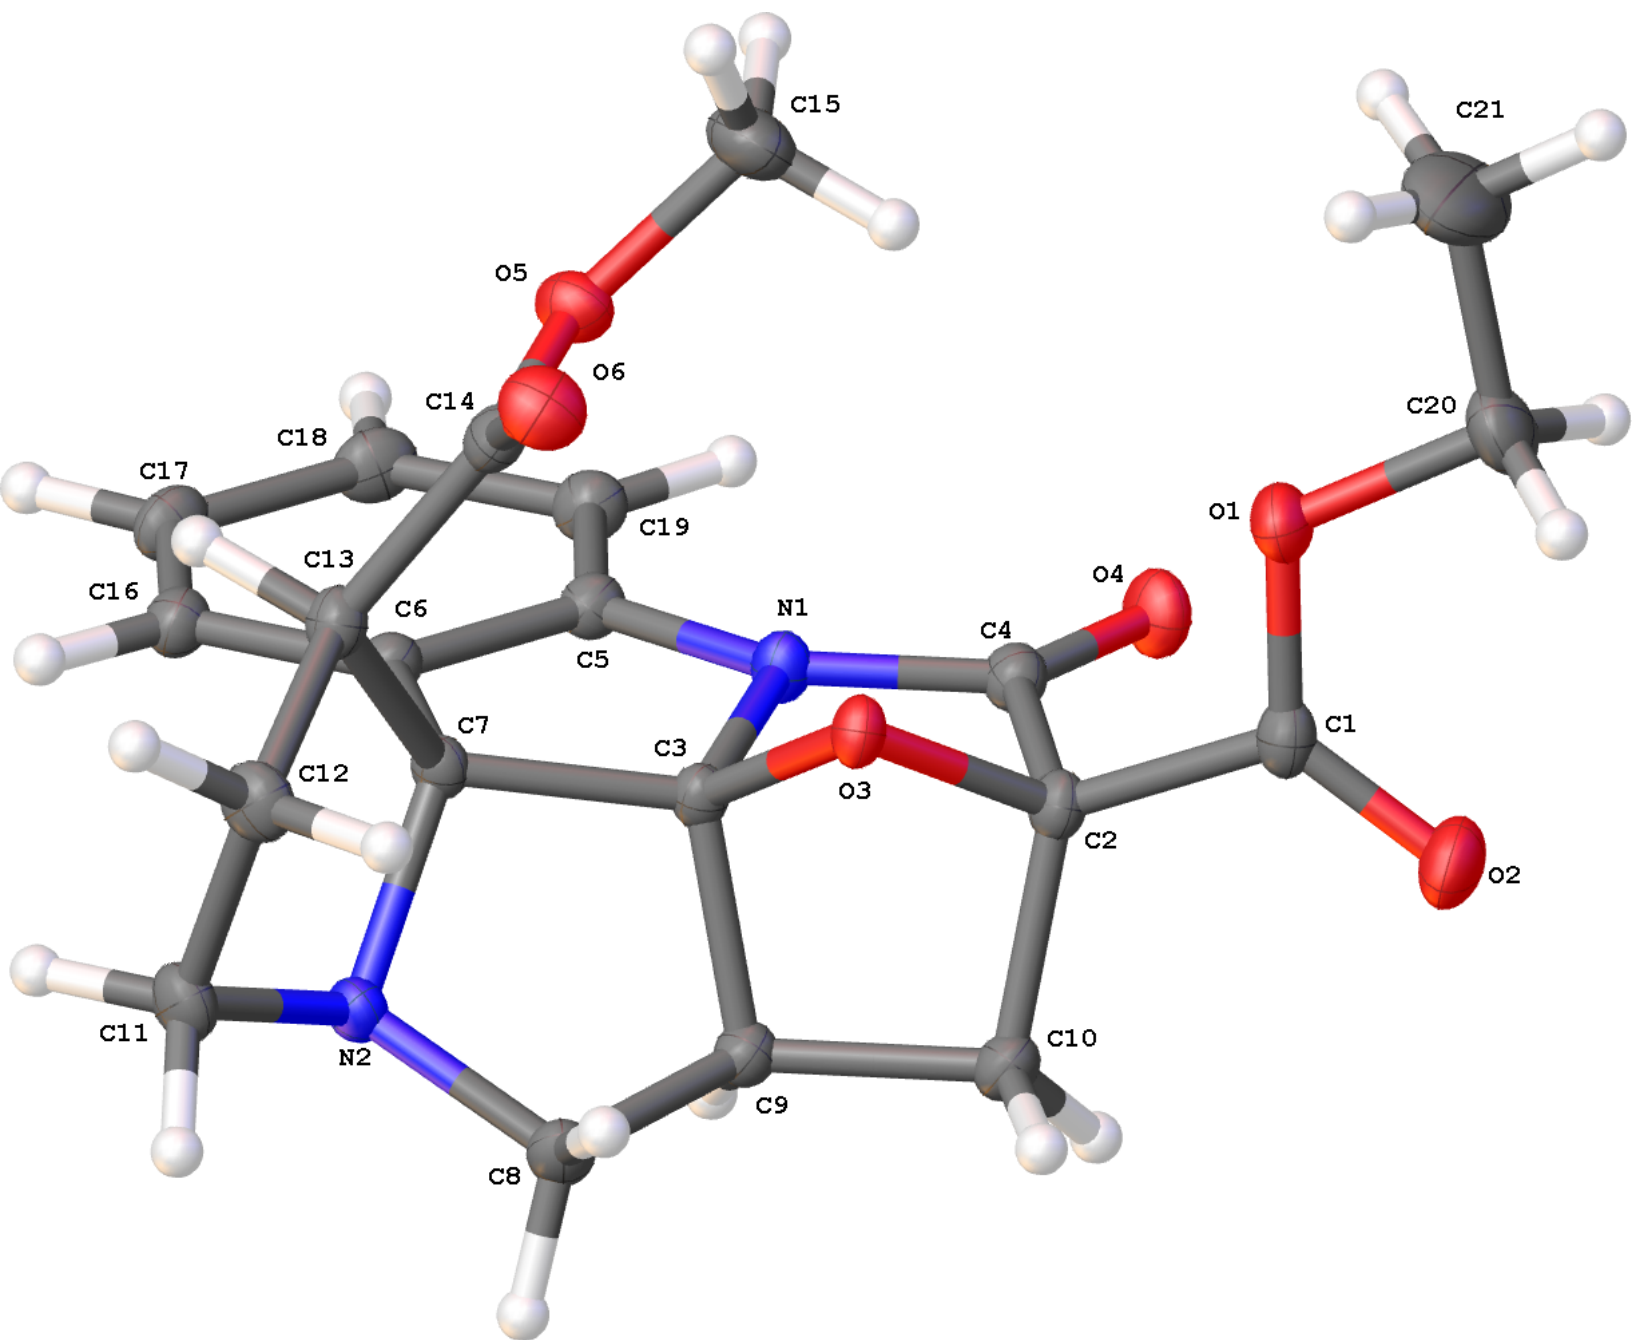



Crystal Data and Experimental for Compounds **37** and **44**

Single clear colorless prism-shaped crystals of both compounds **37** and **44** were crystallised from ether/hexane. A suitable crystal ( $0.73 \times 0.68 \times 0.42 \text{ mm}^3$ ) was selected and mounted on a loop with paratone oil on a Bruker APEX-II CCD diffractometer. The crystal was cooled to  $T = 100(2) \text{ K}$  during data collection. The structures were solved with the **ShelXT-2014/4** (Sheldrick, 2015) structure solution program using the Charge Flipping solution method and by using **Olex2** (Dolomanov et al., 2009) as the graphical interface. The model was refined with version 2014/7 of **ShelXL-2014/7** (Sheldrick, 2014) using Least Squares minimisation.

A clear colourless prism-shaped crystal with dimensions  $0.73 \times 0.68 \times 0.42 \text{ mm}^3$  was mounted on a loop with paratone oil. Data were collected using a Bruker APEX-II CCD diffractometer equipped with a Oxford Cryosystems low-temperature device, operating at  $T = 100(2) \text{ K}$ .

Data were measured using  $f$  and  $w$  scans using  $\text{MoK}_\alpha$  radiation (fine-focus sealed tube, 45 kV, 35 mA). The total number of runs and images was based on the strategy calculation from the program **APEX2** (Bruker). The maximum resolution that was achieved was  $Q = 37.858^\circ$ .

The diffraction patterns were indexed using **SAINT** (Bruker, V8.27A, 2012) and the unit cells were refined using **SAINT** (Bruker, V8.27A, 2012) on 9990 reflections, 24 % of the observed reflections. Data reduction, scaling and absorption corrections were performed using **SAINT** (Bruker, V8.27A, 2012) and **SADABS-2012/1** (Bruker, 2012). The values of  $wR_2(\text{int})$  were 0.0824 before and 0.0598 after correction. The ratio of minimum to maximum transmission is 0.8393. The  $//2$  correction factor is 0.0015. The final completeness is 99.9% out to  $37.858^\circ$  in  $Q$ . The absorption coefficient  $\mu$  of this material is  $0.091 \text{ mm}^{-1}$  at this wavelength ( $\lambda = 0.71073 \text{ \AA}$ ) and the minimum and maximum transmissions are 0.8393 and 1.0000.

The structures were solved and the space group  $P-1$  (# 2) determined by the **ShelXT-2014/4** (Sheldrick, 2015) structure solution program using Charge Flipping and refined by Least Squares using version 2014/7 of **ShelXL-2014/7** (Sheldrick, 2014). All non-hydrogen atoms were refined anisotropically. Hydrogen atom positions were calculated geometrically and refined using the riding model.

Table 1. Crystal data and structure refinement for compound **37**

|                                             |                                                   |
|---------------------------------------------|---------------------------------------------------|
| Empirical formula                           | C <sub>25</sub> H <sub>23</sub> NO <sub>4</sub>   |
| Formula weight                              | 401.44                                            |
| Temperature/K                               | 172.3                                             |
| Crystal system                              | triclinic                                         |
| Space group                                 | P-1                                               |
| a/Å                                         | 9.0316(2)                                         |
| b/Å                                         | 10.4052(2)                                        |
| c/Å                                         | 10.9083(3)                                        |
| $\alpha$ /°                                 | 99.9550(10)                                       |
| $\beta$ /°                                  | 97.1890(10)                                       |
| $\gamma$ /°                                 | 97.4110(10)                                       |
| Volume/Å <sup>3</sup>                       | 989.77(4)                                         |
| Z                                           | 2                                                 |
| $\rho_{\text{calc}}$ /mg/mm <sup>3</sup>    | 1.347                                             |
| m/mm <sup>-1</sup>                          | 0.091                                             |
| F(000)                                      | 424.0                                             |
| Crystal size/mm <sup>3</sup>                | 0.735 × 0.675 × 0.418                             |
| 2 $\Theta$ range for data collection        | 3.834 to 75.716°                                  |
| Index ranges                                | -15 ≤ h ≤ 15, -17 ≤ k ≤ 17, -18 ≤ l ≤ 18          |
| Reflections collected                       | 40859                                             |
| Independent reflections                     | 10498[R(int) = 0.0476]                            |
| Data/restraints/parameters                  | 10498/0/363                                       |
| Goodness-of-fit on F <sup>2</sup>           | 1.028                                             |
| Final R indexes [I ≥ 2 $\sigma$ (I)]        | R <sub>1</sub> = 0.0466, wR <sub>2</sub> = 0.1265 |
| Final R indexes [all data]                  | R <sub>1</sub> = 0.0535, wR <sub>2</sub> = 0.1355 |
| Largest diff. peak/hole / e Å <sup>-3</sup> | 0.74/-0.37                                        |

Table 2. Crystal data and structure refinement for compound **44**

|                                   |                                                               |                               |
|-----------------------------------|---------------------------------------------------------------|-------------------------------|
| Empirical formula                 | C <sub>21</sub> H <sub>22</sub> N <sub>2</sub> O <sub>6</sub> |                               |
| Formula weight                    | 398.40                                                        |                               |
| Temperature                       | 110(2) K                                                      |                               |
| Wavelength                        | 0.71073 Å                                                     |                               |
| Crystal system                    | Monoclinic                                                    |                               |
| Space group                       | P 1 2 <sub>1</sub> /c 1                                       |                               |
| Unit cell dimensions              | a = 12.7648(13) Å                                             | $\alpha = 90^\circ$ .         |
|                                   | b = 9.0440(9) Å                                               | $\beta = 92.9810(10)^\circ$ . |
|                                   | c = 16.8162(18) Å                                             | $\gamma = 90^\circ$ .         |
| Volume                            | 1938.7(3) Å <sup>3</sup>                                      |                               |
| Z                                 | 4                                                             |                               |
| Density (calculated)              | 1.365 Mg/m <sup>3</sup>                                       |                               |
| Absorption coefficient            | 0.101 mm <sup>-1</sup>                                        |                               |
| F(000)                            | 840                                                           |                               |
| Crystal size                      | 0.672 x 0.458 x 0.158 mm <sup>3</sup>                         |                               |
| Theta range for data collection   | 2.426 to 30.995°.                                             |                               |
| Index ranges                      | -18 ≤ h ≤ 18, -12 ≤ k ≤ 13, -24 ≤ l ≤ 24                      |                               |
| Reflections collected             | 22767                                                         |                               |
| Independent reflections           | 6142 [R(int) = 0.0318]                                        |                               |
| Completeness to theta = 25.242°   | 100.0 %                                                       |                               |
| Absorption correction             | Semi-empirical from equivalents                               |                               |
| Max. and min. transmission        | 0.7463 and 0.5813                                             |                               |
| Refinement method                 | Full-matrix least-squares on F <sup>2</sup>                   |                               |
| Data / restraints / parameters    | 6142 / 27 / 337                                               |                               |
| Goodness-of-fit on F <sup>2</sup> | 1.126                                                         |                               |
| Final R indices [I > 2σ(I)]       | R1 = 0.0503, wR2 = 0.1192                                     |                               |
| R indices (all data)              | R1 = 0.0683, wR2 = 0.1451                                     |                               |
| Extinction coefficient            | n/a                                                           |                               |
| Largest diff. peak and hole       | 0.607 and -0.309 e.Å <sup>-3</sup>                            |                               |
